# Supplementary material for: Genomic Characterization of DArT Markers Based on High-Density Linkage Analysis and Physical Mapping to the Eucalyptus Genome
Source: PubMed Central journal article supplement (PMC3439404; doi:10.1371/journal.pone.0044684), 2012-09-11
Supplement: pone.0044684.s001.pdf [file pone.0044684.s001.pdf]

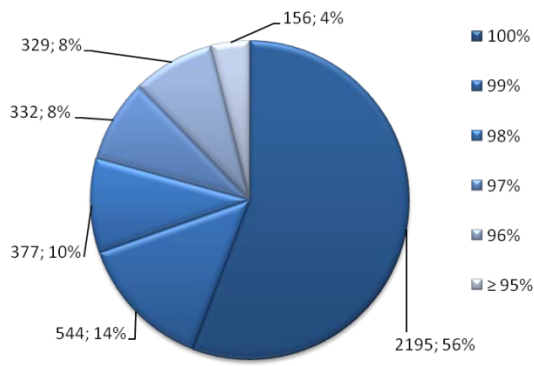

Reproducibility

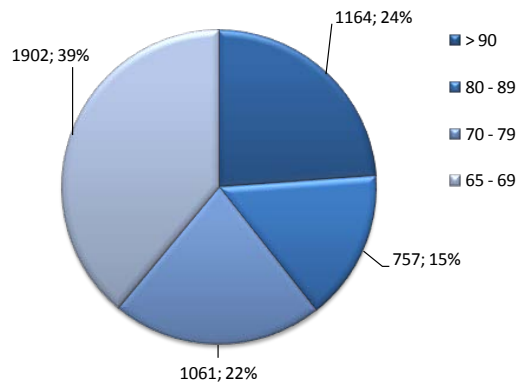

Quality score

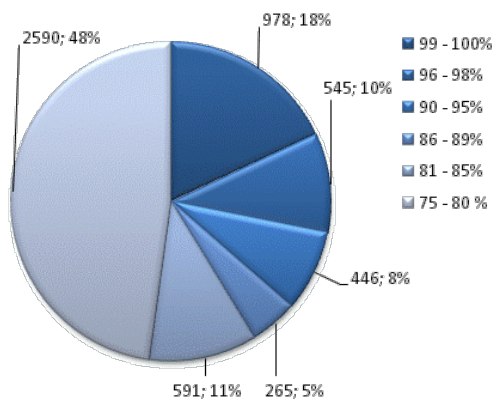

Call rate

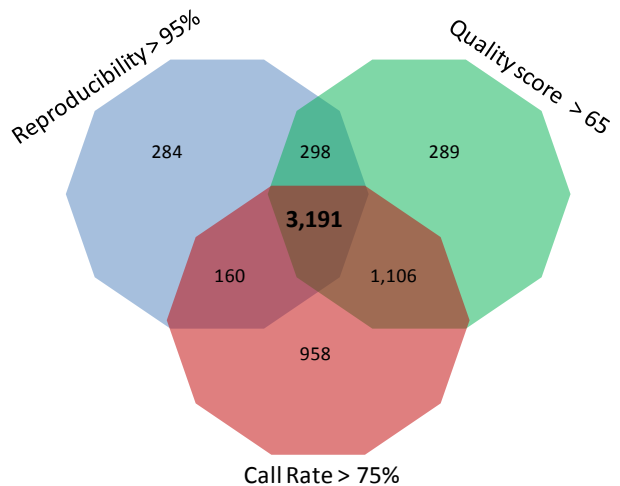

**Figure S1.** Distributions of the number and percentages of DArT markers that passed the filtering thresholds adopted for reproducibility ( $\geq 95\%$ ) quality score ( $Q \geq 65$ ) and call rate ( $\geq 75\%$ ). A Venn diagram consolidates the information showing all possible classifications of the DArT markers according to the three filtering criteria adopted. Only markers that satisfied simultaneously all three criteria were used for linkage mapping.
