# Supplementary material for: Genomic Characterization of DArT Markers Based on High-Density Linkage Analysis and Physical Mapping to the Eucalyptus Genome
Source: PubMed Central journal article supplement (PMC3439404; doi:10.1371/journal.pone.0044684), 2012-09-11
Supplement: pone.0044684.s004.pdf [file pone.0044684.s004.pdf]

**Additional File 4.** List of the 45 DArT markers mapped to the eleven linkage groups and positioned onto small unanchored scaffolds of the current *Eucalyptus grandis* genome assembly available into Phytozome 6.0. These linkage mapped DArT markers allowed assigning 31 small scaffolds (1.4 Mbp of sequence) to the 11 main pseudochromosomes.

| DArT MARKER | DArT MARKER LINKAGE MAP POSITION (cM) | LINKAGE GROUP/ PSEUDOCHROMOSOME | DArT sequence size (bp) | UNANCHORED SCAFFOLD # | SCAFFOLD SIZE (bp) |
|-------------|---------------------------------------|---------------------------------|-------------------------|-----------------------|--------------------|
| ePt-571990  | 39.98                                 | 7                               | 342                     | 24                    | 625,428            |
| ePt-599305  | 45.43                                 | 3                               | 226                     | 50                    | 200,725            |
| ePt-639198  | 60.54                                 | 2                               | 688                     | 118                   | 109,742            |
| ePt-569673  | 36.45                                 | 2                               | 326                     | 134                   | 73,680             |
| ePt-574447  | 77.42                                 | 2                               | 497                     | 134                   |                    |
| ePt-641713  | 36.62                                 | 2                               | 305                     | 134                   |                    |
| ePt-568315  | 30.79                                 | 7                               | 317                     | 207                   | 54,558             |
| ePt-503680  | 85.13                                 | 8                               | 310                     | 207                   |                    |
| ePt-572981  | 92.18                                 | 9                               | 337                     | 460                   | 27,208             |
| ePt-599970  | 69.7                                  | 6                               | 452                     | 491                   | 26,388             |
| ePt-641657  | 69.7                                  | 6                               | 453                     | 491                   |                    |
| ePt-641907  | 69.7                                  | 6                               | 452                     | 491                   |                    |
| ePt-642658  | 69.7                                  | 6                               | 453                     | 491                   |                    |
| ePt-503696  | 47.35                                 | 6                               | 465                     | 499                   | 25,365             |
| ePt-641193  | 26.65                                 | 8                               | 304                     | 556                   | 23,569             |
| ePt-571092  | 93.5                                  | 2                               | 295                     | 578                   | 23,216             |
| ePt-565718  | 7                                     | 6                               | 610                     | 686                   | 22,065             |
| ePt-641578  | 6.55                                  | 6                               | 438                     | 686                   |                    |
| ePt-503229  | 11.76                                 | 10                              | 241                     | 746                   | 18,491             |
| ePt-570410  | 34.11                                 | 9                               | 522                     | 847                   | 16,120             |
| ePt-642696  | 42.73                                 | 9                               | 536                     | 847                   |                    |
| ePt-643222  | 44.55                                 | 11                              | 554                     | 949                   | 14,791             |
| ePt-599337  | 148.04                                | 1                               | 377                     | 958                   | 16,434             |
| ePt-643196  | 148.46                                | 1                               | 376                     | 958                   |                    |
| ePt-567002  | 64.73                                 | 8                               | 445                     | 1033                  |                    |
| ePt-640230  | 44.41                                 | 3                               | 292                     | 1165                  | 12,751             |
| ePt-572676  | 35.65                                 | 10                              | 382                     | 1221                  | 12,304             |
| ePt-575708  | 98.48                                 | 8                               | 549                     | 1340                  | 11,269             |
| ePt-644097  | 98.48                                 | 8                               | 558                     | 1340                  |                    |
| ePt-599556  | 56.67                                 | 2                               | 546                     | 1519                  | 10,167             |
| ePt-599364  | 63.45                                 | 8                               | 245                     | 1533                  | 9,961              |
| ePt-570223  | 30.13                                 | 3                               | 399                     | 1585                  | 10,093             |
| ePt-640659  | 122.09                                | 2                               | 342                     | 1685                  | 9,193              |
| ePt-504097  | 31.65                                 | 8                               | 601                     | 1742                  | 8,856              |
| ePt-565887  | 51.24                                 | 5                               | 580                     | 1843                  | 8,383              |
| ePt-599614  | 50.38                                 | 5                               | 578                     | 1843                  |                    |
| ePt-643170  | 51.28                                 | 5                               | 578                     | 1843                  |                    |
| ePt-570110  | 81.04                                 | 9                               | 229                     | 1891                  | 8,187              |
| ePt-568521  | 59.84                                 | 2                               | 381                     | 1915                  | 8,269              |
| ePt-564907  | 29.1                                  | 9                               | 356                     | 2966                  | 7,743              |
| ePt-573755  | 34.37                                 | 3                               | 383                     | 3233                  | 4,288              |
| ePt-599351  | 34.43                                 | 3                               | 384                     | 3233                  |                    |
| ePt-568568  | 85.77                                 | 5                               | 383                     | 3329                  | 4,170              |
| ePt-572802  | 47.53                                 | 3                               | 263                     | 4064                  | 3,562              |
| ePt-573923  | 47.51                                 | 3                               | 263                     | 4064                  |                    |
