# Supplementary material for: Genomic Characterization of DArT Markers Based on High-Density Linkage Analysis and Physical Mapping to the Eucalyptus Genome
Source: PLoS One. 2012 Sep 11;7(9):e44684. doi: 10.1371/journal.pone.0044684 (PMC3439404; doi:10.1371/journal.pone.0044684)
Supplement: Table S2 — BLASTn hits of DArT marker probes (Genbank accession numbers HR865291-HR872186) searched against the complete NCBI EST database (August 12 2010 build); 3,703 (53.6%) returned with positive BLASTn hits (e value <1e–5). (XLSX) [file pone.0044684.s005.xlsx]

## Sheet: DArT probes ncbiEST best hits
Table S2. BLASTn hits of DArT marker probes (Genbank accession numbers HR865291-HR872186) searched against the complete NCBI EST database (August 12 2010 build); 3,703 (53.6%) returned with positive BLASTn hits (e value < 1e-5).
GSS name	ncbi_EST_others_hit	Lowest e-value	Highest bitscore	ACC Lowest e-value	Description Lowest e-value
ePt_563905	YES	9.78251e-06	60.7975	EC954871	WIN0563.C21_A17 Cab Sauv flower, leaf and root normalized (WIN05) Vitis vinifera cDNA clone WIN0563_A17 3', mRNA sequence.
ePt_562956	YES	9.73916e-06	60.7975	EE097986	S9B01563 Ripening Berries (VvS9) Vitis vinifera cDNA clone S9B01563, mRNA sequence.
ePt_642912	YES	9.71026e-06	60.7975	GW834759	FES026N14_7954 Ficus elastica stem cDNA library (FES) Ficus elastica cDNA clone FES026N14, mRNA sequence.
ePt_572901	YES	9.62356e-06	60.7975	HO793072	vsu-ars_018105_LI10Contig_12814 VSU-ARS-L10 Phaseolus acutifolius cDNA, mRNA sequence.
ePt_642840	YES	9.61862e-06	58.9941	CN523479	GQ015M02.T3_F05 GQ015 Populus trichocarpa x Populus deltoides cDNA clone GQ015M02_F05 5', mRNA sequence.
ePt_570404	YES	9.51737e-06	58.9941	CO087645	GR__Ea06D10.f GR__Ea Gossypium raimondii cDNA clone GR__Ea06D10 5', mRNA sequence.
ePt_639295	YES	9.2942e-06	60.7975	FS244615	FS244615 RPSC Glycyrrhiza uralensis cDNA clone KAN061-N14.F 5', mRNA sequence.
ePt_564868	YES	9.22182e-06	60.7975	FR617747	FR617747 WZOAFSAA Fagus sylvatica cDNA clone WZ0AFSAA25YF08FM1, mRNA sequence.
ePt_641633	YES	9.19286e-06	60.7975	CT989476	CT989476 Eucalyptus globulus microgravity versus gravity subtracted library Eucalyptus globulus subsp. bicostata cDNA, mRNA sequence.
ePt_503770	YES	8.97571e-06	60.7975	BE213477	GF-FV-P6E3 Marsh grapefruit young flavedo Citrus x paradisi cDNA, mRNA sequence.
ePt_637023	YES	8.71512e-06	60.7975	CT981504	CT981504 Eucalyptus gunnii differentiating xylem AFOCEL clone 832 Eucalyptus gunnii cDNA, mRNA sequence.
ePt_640193	YES	8.71512e-06	60.7975	CT981504	CT981504 Eucalyptus gunnii differentiating xylem AFOCEL clone 832 Eucalyptus gunnii cDNA, mRNA sequence.
ePt_563308	YES	8.70065e-06	60.7975	CT981504	CT981504 Eucalyptus gunnii differentiating xylem AFOCEL clone 832 Eucalyptus gunnii cDNA, mRNA sequence.
ePt_564975	YES	8.70065e-06	60.7975	CT981504	CT981504 Eucalyptus gunnii differentiating xylem AFOCEL clone 832 Eucalyptus gunnii cDNA, mRNA sequence.
ePt_570779	YES	8.68617e-06	60.7975	CT981504	CT981504 Eucalyptus gunnii differentiating xylem AFOCEL clone 832 Eucalyptus gunnii cDNA, mRNA sequence.
ePt_641752	YES	8.67169e-06	60.7975	GW828624	FES007B13_1819 Ficus elastica stem cDNA library (FES) Ficus elastica cDNA clone FES007B13, mRNA sequence.
ePt_568631	YES	8.44006e-06	60.7975	CU400282	CU400282 LG0ABA Eucalyptus gunnii cDNA, mRNA sequence.
ePt_503619	YES	8.29529e-06	60.7975	ES594301	000001602952_E11.ab1 Eucalyptus globulus under low temperature Eucalyptus globulus cDNA, mRNA sequence.
ePt_503630	YES	8.15051e-06	58.9941	DV610189	EST1213185 Glossina morsitans morsitans Fat body cDNA Glossina morsitans morsitans cDNA clone GLABQ73 3' end similar to (Q7T2J1) Membrane-type matrix metalloproteinase 1 beta, mRNA sequence.
ePt_643410	YES	8.10709e-06	60.7975	GE542534	CCHS28872.b1_O17.ab1 CCHS Espina Barnadesia spinosa cDNA clone CCHS28872, mRNA sequence.
ePt_575395	YES	7.80308e-06	60.7975	DY025532	53COT2_T3_017_A07_03SEP2004_063 Brassica napus 36hr germinating seed library 53COT2 Brassica napus cDNA 5', mRNA sequence.
ePt_503791	YES	7.47011e-06	60.7975	CT986930	CT986930 Eucalyptus gunnii differentiating xylem AFOCEL clone 832 Eucalyptus gunnii cDNA, mRNA sequence.
ePt_640708	YES	7.0937e-06	60.7975	FN730486	FN730486 WZOAQPAC Quercus petraea cDNA clone WZ0AQPAI11YJ03FM1, mRNA sequence.
ePt_570835	YES	6.94894e-06	60.7975	EH687179	CCIM11950.b1_K11.ab1 CCI(LMS) chicory Cichorium intybus cDNA clone CCIM11950, mRNA sequence.
ePt_504030	YES	6.0948e-06	60.7975	CT980644	CT980644 Eucalyptus gunnii differentiating xylem AFOCEL clone 832 Eucalyptus gunnii cDNA, mRNA sequence.
ePt_638254	YES	6.0948e-06	60.7975	CT980644	CT980644 Eucalyptus gunnii differentiating xylem AFOCEL clone 832 Eucalyptus gunnii cDNA, mRNA sequence.
ePt_571664	YES	5.9645e-06	60.7975	EE097986	S9B01563 Ripening Berries (VvS9) Vitis vinifera cDNA clone S9B01563, mRNA sequence.
ePt_638061	YES	5.16827e-06	60.7975	EG668789	RCRC895TP Castor bean cDNA library from roots, 1.8 kb Ricinus communis cDNA clone RCRC895, mRNA sequence.
ePt_641122	YES	5.0235e-06	60.7975	EH732259	CNMM5175.b1_N21.ab1 CNM(LMS) spotted knapweed Centaurea maculosa cDNA clone CNMM5175, mRNA sequence.
ePt_503840	YES	5.00902e-06	60.7975	GO248062	EgTS_4E11 Eucalyptus globulus C14 clone shoot apex under hydric stress Eucalyptus globulus cDNA, mRNA sequence.
ePt_644495	YES	5.00902e-06	60.7975	GO248062	EgTS_4E11 Eucalyptus globulus C14 clone shoot apex under hydric stress Eucalyptus globulus cDNA, mRNA sequence.
ePt_569121	YES	4.98007e-06	60.7975	FN730486	FN730486 WZOAQPAC Quercus petraea cDNA clone WZ0AQPAI11YJ03FM1, mRNA sequence.
ePt_569404	YES	4.98007e-06	60.7975	GO248062	EgTS_4E11 Eucalyptus globulus C14 clone shoot apex under hydric stress Eucalyptus globulus cDNA, mRNA sequence.
ePt_639161	YES	4.51681e-06	60.7975	DN492462	X021D06.3pR Populus wood cDNA library Populus tremula x Populus tremuloides cDNA clone X021D06 3', mRNA sequence.
ePt_641883	YES	4.51681e-06	60.7975	FN730486	FN730486 WZOAQPAC Quercus petraea cDNA clone WZ0AQPAI11YJ03FM1, mRNA sequence.
ePt_571786	YES	4.50233e-06	60.7975	DV142871	CV03132A2C06.f1 CV03-normalized library Euphorbia esula cDNA clone CV03132A2C06.f1 5, mRNA sequence.
ePt_641542	YES	4.4589e-06	60.7975	FP050940	FP050940 LG0AAC Quercus petraea cDNA clone LG0AAC10YN18RM1, mRNA sequence.
ePt_568164	YES	4.42995e-06	60.7975	FN730486	FN730486 WZOAQPAC Quercus petraea cDNA clone WZ0AQPAI11YJ03FM1, mRNA sequence.
ePt_574816	YES	4.42995e-06	60.7975	AJ762199	AJ762199 G00006 Gerbera hybrid cultivar cDNA clone G0000600009A04F1, mRNA sequence.
ePt_639903	YES	4.42995e-06	60.7975	AJ762199	AJ762199 G00006 Gerbera hybrid cultivar cDNA clone G0000600009A04F1, mRNA sequence.
ePt_575280	YES	4.36574e-06	60.7975	FN730486	FN730486 WZOAQPAC Quercus petraea cDNA clone WZ0AQPAI11YJ03FM1, mRNA sequence.
ePt_564008	YES	4.32222e-06	60.7975	CU396289	CU396289 LG0ABA Eucalyptus gunnii cDNA, mRNA sequence.
ePt_565609	YES	4.26421e-06	60.7975	EY696331	CS00-C3-700-046-D01-CT.F Sweet orange fruit, development stadium (1 of 6) Citrus sinensis cDNA, mRNA sequence.
ePt_503013	YES	4.2497e-06	60.7975	CF205220	RR890915I0004_IVa_Fa_F06 Vitis sp. RR890915I Vitis hybrid cultivar cDNA clone RR890915I0004_IVa_Fa_F06 5', mRNA sequence.
ePt_565027	YES	4.2352e-06	60.7975	GR933143	1443 Cleome spinosa normalized leaf ESTs ES1018 Cleome spinosa cDNA, mRNA sequence.
ePt_564011	YES	3.9909e-06	62.6008	FN749270	FN749270 WZOAQRAP Quercus robur cDNA clone WZ0AQRAP12YN19FM1, mRNA sequence.
ePt_637599	YES	3.9909e-06	62.6008	DT468879	GH_CHX22J15.r GH_CHX Gossypium hirsutum cDNA clone GH_CHX22J15 3', mRNA sequence.
ePt_574580	YES	3.97434e-06	62.6008	GW870527	Pm_1953 Fruits and flowers of Prunus mume cv. Xiyeqing Prunus mume cDNA, mRNA sequence.
ePt_568068	YES	3.71766e-06	62.6008	ES653410	Hops-CTAB15_2007-03-27/Hops-CTAB15_D12_045_1 Humulus lupulus (L. cultivar Phoenix) Trichome isolated from the female flower at mid-developmental stage Humulus lupulus cDNA, mRNA sequence.
ePt_571198	YES	3.62603e-06	60.7975	GT022898	ERB01_09_04_H21_D06_021 Ribes nigrum Ben Hope pooled bud (SCRI_Rn_bud_cDNA) Ribes nigrum cDNA, mRNA sequence.
ePt_503815	YES	3.53136e-06	62.6008	CV002664	nad03-13cs1-g02 Nad03 Nuphar advena cDNA clone nad03-13cs1-g02 5', mRNA sequence.
ePt_574259	YES	3.45198e-06	60.7975	HO117681	BCYL28C02 Black cohosh young leaf library (BCYL) Actaea racemosa cDNA 5', mRNA sequence.
ePt_643917	YES	3.44029e-06	62.6008	DR945021	EST1136560 Aquilegia cDNA library Aquilegia formosa x Aquilegia pubescens cDNA clone CO1QQ33, mRNA sequence.
ePt_571603	YES	3.43201e-06	62.6008	CV002664	nad03-13cs1-g02 Nad03 Nuphar advena cDNA clone nad03-13cs1-g02 5', mRNA sequence.
ePt_642010	YES	3.25399e-06	62.6008	EG028798	AH1255 Shanyou 523 Peanut Cotyledon cDNA Library Arachis hypogaea cDNA 5', mRNA sequence.
ePt_565455	YES	3.21673e-06	62.6008	HS301763	CFNW16403.g1 CFNW Botryococcus braunii UTEX 572 normalized (L) Botryococcus braunii cDNA clone CFNW16403 3', mRNA sequence.
ePt_570052	YES	3.1764e-06	60.7975	EE097986	S9B01563 Ripening Berries (VvS9) Vitis vinifera cDNA clone S9B01563, mRNA sequence.
ePt_636710	YES	3.17533e-06	62.6008	EY676347	CS00-C1-401-021-F08-CT.F Sweet orange leaf, infected with CiLV Citrus sinensis cDNA, mRNA sequence.
ePt_642936	YES	3.14221e-06	62.6008	CB083386	hp96g05.b2 Hedyotis centranthoides flower - Stage 2 (NYBG) Kadua centranthoides cDNA clone hp96g05, mRNA sequence.
ePt_644032	YES	3.09667e-06	62.6008	FR647044	FR647044 WZ0AFEAA Fraxinus excelsior cDNA clone WZ0AFEAA8YE18CM1, mRNA sequence.
ePt_503989	YES	3.07183e-06	62.6008	BX840151	BX840151 Arabidopsis thaliana Hormone Treated Callus Col-0 Arabidopsis thaliana cDNA clone GSLTPGH40ZG07 5PRIM, mRNA sequence.
ePt_569222	YES	2.96419e-06	62.6008	FP041581	FP041581 LG0AAC Quercus petraea cDNA clone LG0AAC9YB08RM1, mRNA sequence.
ePt_504070	YES	2.86483e-06	62.6008	ES596994	000001604452_L14.ab1 Eucalyptus globulus under low temperature Eucalyptus globulus cDNA, mRNA sequence.
ePt_570041	YES	2.78204e-06	62.6008	BP951887	BP951887 Bg05 Burma mangrove cDNA library Bruguiera gymnorhiza cDNA clone Bg05-19_M20 5', mRNA sequence.
ePt_637419	YES	2.77028e-06	60.7975	EY822053	PT11-C1-901-040-D10-CT.F Poncirus trifoliata leaf, infected with CTV Citrus trifoliata cDNA, mRNA sequence.
ePt_575323	YES	2.70846e-06	62.6008	FF534491	CASR337TF CASR Manihot esculenta cDNA 5', mRNA sequence.
ePt_504206	YES	2.65454e-06	62.6008	DW496471	GH_TMIRS_006_D10_F Cotton Normalized Library dT primed Gossypium hirsutum cDNA, mRNA sequence.
ePt_643939	YES	2.65454e-06	62.6008	CV002664	nad03-13cs1-g02 Nad03 Nuphar advena cDNA clone nad03-13cs1-g02 5', mRNA sequence.
ePt_503703	YES	2.62136e-06	62.6008	CJ772527	CJ772527 Ipomoea nil shoot 8-days old seedling Ipomoea nil cDNA clone jmsf45o18 3', mRNA sequence.
ePt_563458	YES	2.62136e-06	62.6008	CN876083	020813AARA008735HT (AARA) Royal Gala partially senescing leaf Malus x domestica cDNA clone AARA008735, mRNA sequence.
ePt_503808	YES	2.60477e-06	62.6008	DW497012	GH_TMIRS_012_B05_F Cotton Normalized Library dT primed Gossypium hirsutum cDNA, mRNA sequence.
ePt_565356	YES	2.59624e-06	60.7975	FG185863	AGN_PNL210af1_g9.trimmed.seq AGN_PNL Nicotiana tabacum cDNA 5', mRNA sequence.
ePt_564406	YES	2.47619e-06	62.6008	CU571542	CU571542 HYPO23I_KZ0AAP Theobroma cacao cDNA clone KZ0AAP10YK20FM1, mRNA sequence.
ePt_503324	YES	2.443e-06	62.6008	FP029541	FP029541 LG0AAA Quercus robur cDNA clone LG0AAA16YG05RM1, mRNA sequence.
ePt_503647	YES	2.38079e-06	62.6008	DW494242	GH_RMIRS_101_C08_R Cotton Normalized Library random primed Gossypium hirsutum cDNA, mRNA sequence.
ePt_599290	YES	2.35175e-06	62.6008	GW834759	FES026N14_7954 Ficus elastica stem cDNA library (FES) Ficus elastica cDNA clone FES026N14, mRNA sequence.
ePt_638962	YES	2.34346e-06	62.6008	DW494242	GH_RMIRS_101_C08_R Cotton Normalized Library random primed Gossypium hirsutum cDNA, mRNA sequence.
ePt_504022	YES	2.33516e-06	62.6008	GT112432	Lv_Cd-PL42.001_J02 Cd-PL42 Litopenaeus vannamei cDNA, mRNA sequence.
ePt_563039	YES	2.33102e-06	62.6008	CN876083	020813AARA008735HT (AARA) Royal Gala partially senescing leaf Malus x domestica cDNA clone AARA008735, mRNA sequence.
ePt_503702	YES	2.28954e-06	62.6008	DY378975	ZO__Eg0005L18.r ZO__Eg Zingiber officinale cDNA clone ZO__Eg0005L18 3', mRNA sequence.
ePt_574478	YES	2.25221e-06	62.6008	CU571542	CU571542 HYPO23I_KZ0AAP Theobroma cacao cDNA clone KZ0AAP10YK20FM1, mRNA sequence.
ePt_640880	YES	2.23147e-06	62.6008	FR629069	FR629069 WZ0AQRAS Quercus robur cDNA clone WZ0AQRAS25YH11CM1, mRNA sequence.
ePt_571922	YES	2.19012e-06	60.7975	GO530387	Mdltx7527M18.g1 Apple_EST_Mdltx Malus x domestica cDNA 5' similar to ref|NP_567847.1| expressed protein [Arabidopsis thaliana] gb|AAM20461.1| putative protein [Arabidopsis thaliana] gb|AAM65515.1| unknown [Arabidopsis thaliana] gb|AAN15584.1| putative protein [Arabidopsis thaliana], mRNA sequence.
ePt_600458	YES	2.16511e-06	62.6008	CT981424	CT981424 Eucalyptus gunnii differentiating xylem AFOCEL clone 832 Eucalyptus gunnii cDNA, mRNA sequence.
ePt_503622	YES	2.1031e-06	60.7975	ES591589	000001601952_F03.ab1 Eucalyptus globulus under low temperature Eucalyptus globulus cDNA, mRNA sequence.
ePt_503645	YES	2.1031e-06	60.7975	ES591589	000001601952_F03.ab1 Eucalyptus globulus under low temperature Eucalyptus globulus cDNA, mRNA sequence.
ePt_564123	YES	2.03653e-06	62.6008	DN798965	Volcani_2_01_C11 Volcani02 Citrus reticulata x Citrus temple cDNA, mRNA sequence.
ePt_563512	YES	2.03238e-06	62.6008	BM525811	sak72b08.y1 Gm-c1036 Glycine max cDNA clone SOYBEAN CLONE ID: Gm-c1036-8512 5' similar to TR:Q9SZ66 Q9SZ66 PUTATIVE DISEASE RESISTANCE PROTEIN ;, mRNA sequence.
ePt_636695	YES	2.00335e-06	62.6008	DW507730	GH_TMIRS_117_B01_F Cotton Normalized Library dT primed Gossypium hirsutum cDNA, mRNA sequence.
ePt_641618	YES	1.9992e-06	62.6008	GO916290	CMFMEb0003F05f CMFMEb Castanea mollissima cDNA, mRNA sequence.
ePt_572306	YES	1.94113e-06	62.6008	FR622472	FR622472 WZOAFSAA Fagus sylvatica cDNA clone WZ0AFSAA48YK16FM1, mRNA sequence.
ePt_575141	YES	1.92454e-06	62.6008	EY724663	CS00-C3-703-079-B02-CT.F Sweet orange fruit, development stadium (4 of 6) Citrus sinensis cDNA, mRNA sequence.
ePt_600558	YES	1.8084e-06	62.6008	EG028798	AH1255 Shanyou 523 Peanut Cotyledon cDNA Library Arachis hypogaea cDNA 5', mRNA sequence.
ePt_568081	YES	1.67153e-06	62.6008	EV255367	MTYCK05TF JCVI-MT1 Medicago truncatula cDNA 5', mRNA sequence.
ePt_570317	YES	1.63005e-06	62.6008	CU401800	CU401800 LG0ABA Eucalyptus gunnii cDNA, mRNA sequence.
ePt_639959	YES	1.60102e-06	62.6008	CX296155	C05134D11SK FerrChloR1 Citrus sinensis x Poncirus trifoliata cDNA clone C05134D11, mRNA sequence.
ePt_572883	YES	1.57198e-06	62.6008	GD060219	KS14030E12 KS14 Capsicum annuum cDNA, mRNA sequence.
ePt_641630	YES	1.54295e-06	62.6008	FG429850	010422KABA016059HT (KABA) A. deliciosa petal Actinidia deliciosa cDNA clone KABAA01605, mRNA sequence.
ePt_639243	YES	1.48027e-06	64.4042	FC882728	IC0AAA99DD10RM1 IVIA1 Citrus clementina cDNA clone IC0AAA99DD10, mRNA sequence.
ePt_575068	YES	1.33971e-06	62.6008	BI973072	sag86e10.y2 Gm-c1084 Glycine max cDNA clone GENOME SYSTEMS CLONE ID: Gm-c1084-1004 5' similar to TR:Q9ZVR7 Q9ZVR7 PUTATIVE RECEPTOR-LIKE PROTEIN KINASE. ;, mRNA sequence.
ePt_565033	YES	1.32312e-06	62.6008	FG642319	TT-16_B17 K326 early senescent leaf library Nicotiana tabacum cDNA, mRNA sequence.
ePt_503614	YES	1.22172e-06	62.6008	ES844262	UFL_108_84 Cotton fiber 0-10 day post anthesis Gossypium hirsutum cDNA, mRNA sequence.
ePt_503830	YES	1.22172e-06	62.6008	ES844262	UFL_108_84 Cotton fiber 0-10 day post anthesis Gossypium hirsutum cDNA, mRNA sequence.
ePt_574219	YES	1.21756e-06	62.6008	DW494242	GH_RMIRS_101_C08_R Cotton Normalized Library random primed Gossypium hirsutum cDNA, mRNA sequence.
ePt_574348	YES	1.21102e-06	64.4042	CA784281	sat96h03.y1 Gm-c1062 Glycine max cDNA clone SOYBEAN CLONE ID: Gm-c1062-6869 5', mRNA sequence.
ePt_567588	YES	1.20509e-06	62.6008	FN735982	FN735982 WZOAQPAC Quercus petraea cDNA clone WZ0AQPAC10YH20FM1, mRNA sequence.
ePt_504698	YES	1.15883e-06	64.4042	GW878025	JC001919 Seed specific Normalized cDNA library from Jatropha curcas L. Jatropha curcas cDNA clone N03466 5' similar to Unknown protein, mRNA sequence.
ePt_574795	YES	1.08874e-06	62.6008	DY640197	PU2_plate19_P23 PU2 Prunus persica cDNA similar to expressed mRNA inferred from Prunus persica hypothetical domain/motif containing IPR007233:Sybindin-like protein, mRNA sequence.
ePt_640126	YES	1.06987e-06	64.4042	FN761735	FN761735 WZOAQPAA Quercus petraea cDNA clone WZ0AQPAH17YI05FM1, mRNA sequence.
ePt_571857	YES	1.04615e-06	64.4042	EG687407	RCRBA15TP Castor bean cDNA library from roots, 1.8 kb Ricinus communis cDNA clone RCRBA15, mRNA sequence.
ePt_571928	YES	1.03785e-06	64.4042	EG687407	RCRBA15TP Castor bean cDNA library from roots, 1.8 kb Ricinus communis cDNA clone RCRBA15, mRNA sequence.
ePt_639379	YES	9.90403e-07	64.4042	CT983556	CT983556 Eucalyptus gunnii differentiating xylem AFOCEL clone 832 Eucalyptus gunnii cDNA, mRNA sequence.
ePt_643557	YES	8.30278e-07	64.4042	DB909867	DB909867 full-length enriched poplar cDNA library, mixture of leaf, bud, stem, root Populus nigra cDNA clone PnFL2-098_N11 3', mRNA sequence.
ePt_564417	YES	8.22788e-07	62.6008	HS269218	CCXA12745.b1 CCXA Euonymus alatus seed tissues collected from 8/14 to 9/19/2007 normalized Euonymus alatus cDNA clone CCXA12745 5', mRNA sequence.
ePt_637958	YES	8.22788e-07	62.6008	CU500531	CU500531 LEAVPAGU_KZ0ACQ Theobroma cacao cDNA clone KZ0ACQ5YJ23FM1, mRNA sequence.
ePt_504325	YES	7.99439e-07	64.4042	ES839014	UFL_049_61 Cotton fiber 0-10 day post anthesis Gossypium hirsutum cDNA, mRNA sequence.
ePt_572860	YES	7.43901e-07	64.4042	BP944172	BP944172 Bg03 Burma mangrove cDNA library Bruguiera gymnorhiza cDNA clone Bg03-09_D17 5', mRNA sequence.
ePt_570479	YES	7.21323e-07	64.4042	EW688412	QSB206 nine-year-old eucalypt xylem library Eucalyptus grandis cDNA, mRNA sequence.
ePt_640855	YES	7.20134e-07	64.4042	CT986874	CT986874 Eucalyptus gunnii differentiating xylem AFOCEL clone 832 Eucalyptus gunnii cDNA, mRNA sequence.
ePt_641471	YES	7.14193e-07	64.4042	CA821219	RA01B09 three-week-old roots incubated in 5uM indole-3-acetic acid 24h before harvesting Populus tremula x Populus alba cDNA 5', mRNA sequence.
ePt_573094	YES	6.61906e-07	64.4042	DY025532	53COT2_T3_017_A07_03SEP2004_063 Brassica napus 36hr germinating seed library 53COT2 Brassica napus cDNA 5', mRNA sequence.
ePt_574857	YES	6.61906e-07	64.4042	CO132369	GR__Eb45C16.f GR__Eb Gossypium raimondii cDNA clone GR__Eb45C16 5', mRNA sequence.
ePt_643795	YES	6.60717e-07	64.4042	FN022979	FN022979 Petunia axillaris subsp. axillaris pool of root and petal tissue Petunia axillaris subsp. axillaris cDNA clone drs12P0001O07_F.ab1 2007-08-10, mRNA sequence.
ePt_569945	YES	6.40515e-07	64.4042	DY025532	53COT2_T3_017_A07_03SEP2004_063 Brassica napus 36hr germinating seed library 53COT2 Brassica napus cDNA 5', mRNA sequence.
ePt_639134	YES	6.39327e-07	64.4042	DY025532	53COT2_T3_017_A07_03SEP2004_063 Brassica napus 36hr germinating seed library 53COT2 Brassica napus cDNA 5', mRNA sequence.
ePt_643336	YES	6.10807e-07	64.4042	GD098047	KS20051G05 KS20 Capsicum annuum cDNA, mRNA sequence.
ePt_566940	YES	5.98391e-07	62.6008	GE508028	CCFT6020.g1_G18.ab1 CCF(STU) sunflower Helianthus annuus cDNA clone CCFT6020, mRNA sequence.
ePt_568151	YES	5.98391e-07	62.6008	GE508028	CCFT6020.g1_G18.ab1 CCF(STU) sunflower Helianthus annuus cDNA clone CCFT6020, mRNA sequence.
ePt_643379	YES	5.81098e-07	64.4042	GD098047	KS20051G05 KS20 Capsicum annuum cDNA, mRNA sequence.
ePt_566500	YES	5.75157e-07	64.4042	CI568755	CI568755 Oryza sativa (japonica cultivar-group) shoot Oryza sativa Japonica Group cDNA clone J01B3051N11T3 5', mRNA sequence.
ePt_569206	YES	5.73968e-07	64.4042	CT981462	CT981462 Eucalyptus gunnii differentiating xylem AFOCEL clone 832 Eucalyptus gunnii cDNA, mRNA sequence.
ePt_640343	YES	5.68027e-07	64.4042	AM837174	AM837174 seedling library, SL Nicotiana tabacum cDNA clone nt002229011, mRNA sequence.
ePt_504176	YES	5.5139e-07	64.4042	AJ627864	AJ627864 Eucalyptus gunnii differentiating xylem Eucalyptus gunnii cDNA clone RTAB DNA-12G08, mRNA sequence.
ePt_504215	YES	5.31188e-07	64.4042	FG917178	UCRVU09_CCNT2102_b1 Cowpea UCR 707 Mixed Tissue and Conditions cDNA Library UCRVU09-1-2 Vigna unguiculata cDNA clone CCNT2102.b1, mRNA sequence.
ePt_638141	YES	5.21681e-07	64.4042	AJ627864	AJ627864 Eucalyptus gunnii differentiating xylem Eucalyptus gunnii cDNA clone RTAB DNA-12G08, mRNA sequence.
ePt_503923	YES	5.09798e-07	64.4042	FN739157	FN739157 WZOAQRAI Quercus robur cDNA clone WZ0AQRAI1YA23FM1, mRNA sequence.
ePt_599402	YES	4.89596e-07	64.4042	AJ627783	AJ627783 Eucalyptus gunnii differentiating xylem Eucalyptus gunnii cDNA clone RTAB DNA-10F04, mRNA sequence.
ePt_563468	YES	4.52758e-07	64.4042	GE540796	CCHS27222.b1_L14.ab1 CCHS Espina Barnadesia spinosa cDNA clone CCHS27222, mRNA sequence.
ePt_564469	YES	4.48004e-07	64.4042	CU401800	CU401800 LG0ABA Eucalyptus gunnii cDNA, mRNA sequence.
ePt_638234	YES	4.45628e-07	64.4042	BW993102	BW993102 Cryptomeria japonica cambium and surrounding tissues Cryptomeria japonica cDNA clone CC10699 3', mRNA sequence.
ePt_644289	YES	4.44439e-07	64.4042	FR629780	FR629780 WZ0AQRAS Quercus robur cDNA clone WZ0AQRAS27YO14CM1, mRNA sequence.
ePt_571428	YES	4.39686e-07	64.4042	AM716695	AM716695 Cucumis melo subsp. agrestis pat81 root 46 days after pollination infected with M. cannonballus Cucumis melo subsp. agrestis cDNA, mRNA sequence.
ePt_574236	YES	4.37309e-07	64.4042	CN941822	010919AVBC018021PG (AVBC) Royal Gala young shoot Malus x domestica cDNA clone AVBC018021, mRNA sequence.
ePt_567464	YES	4.30179e-07	64.4042	DR991588	Mdlr7008L12.g1 Apple_EST_Mdlr Malus x domestica cDNA similar to ref|NP_178423.1| expressed protein [Arabidopsis thaliana] pir|T02702 hypothetical protein At2g03240 [imported] - Arabidopsis thaliana gb|AAC34478.1| unknown protein [Arabidopsis thaliana], mRNA sequence.
ePt_640029	YES	4.30179e-07	64.4042	DR991588	Mdlr7008L12.g1 Apple_EST_Mdlr Malus x domestica cDNA similar to ref|NP_178423.1| expressed protein [Arabidopsis thaliana] pir|T02702 hypothetical protein At2g03240 [imported] - Arabidopsis thaliana gb|AAC34478.1| unknown protein [Arabidopsis thaliana], mRNA sequence.
ePt_503897	YES	4.27803e-07	64.4042	DY653226	PU4_plate35_K20 PU4 Prunus persica cDNA similar to expressed mRNA inferred from CD2-binding protein-related [Arabidopsis thaliana], mRNA sequence.
ePt_574967	YES	4.26614e-07	64.4042	GH166005	Nas37_C11_2005-01-08_091.ab1 Nasturtium 22 days post-anthesis library Tropaeolum majus cDNA, mRNA sequence.
ePt_572568	YES	4.25426e-07	64.4042	GH166005	Nas37_C11_2005-01-08_091.ab1 Nasturtium 22 days post-anthesis library Tropaeolum majus cDNA, mRNA sequence.
ePt_567700	YES	4.09977e-07	64.4042	AM716695	AM716695 Cucumis melo subsp. agrestis pat81 root 46 days after pollination infected with M. cannonballus Cucumis melo subsp. agrestis cDNA, mRNA sequence.
ePt_642956	YES	4.08789e-07	64.4042	CN941822	010919AVBC018021PG (AVBC) Royal Gala young shoot Malus x domestica cDNA clone AVBC018021, mRNA sequence.
ePt_638596	YES	4.05224e-07	64.4042	DY653226	PU4_plate35_K20 PU4 Prunus persica cDNA similar to expressed mRNA inferred from CD2-binding protein-related [Arabidopsis thaliana], mRNA sequence.
ePt_640132	YES	4.04036e-07	64.4042	DT002770	Mdrta1017C13.g1 Apple_EST_Mdrta Malus x domestica cDNA similar to ref|NP_178330.1| leucine-rich repeat transmembrane protein kinase, putative [Arabidopsis thaliana] sp|Q9ZVR7|PSKR_ARATH Putative phytosulfokine receptor precursor (Phytosulfokine LRR receptor kinase) pir|D84434 probable receptor-like protein kinas, mRNA sequence.
ePt_567638	YES	3.98094e-07	64.4042	DY653226	PU4_plate35_K20 PU4 Prunus persica cDNA similar to expressed mRNA inferred from CD2-binding protein-related [Arabidopsis thaliana], mRNA sequence.
ePt_566746	YES	3.45943e-07	66.2076	CK747537	pam01-3ms2-d02 Pam01 Persea americana cDNA clone pam01-3ms2-d02 5', mRNA sequence.
ePt_572142	YES	3.3235e-07	66.2076	CU399222	CU399222 LG0ABA Eucalyptus gunnii cDNA, mRNA sequence.
ePt_565513	YES	3.20263e-07	64.4042	FR634023	FR634023 WZ0AQRAS Quercus robur cDNA clone WZ0AQRAS5YA19CM2, mRNA sequence.
ePt_504202	YES	3.1312e-07	64.4042	DV169655	ZM_BFb0168N15.r ZM_BFb Zea mays cDNA 5', mRNA sequence.
ePt_573637	YES	3.00746e-07	66.2076	CT984989	CT984989 Eucalyptus gunnii differentiating xylem AFOCEL clone 832 Eucalyptus gunnii cDNA, mRNA sequence.
ePt_567794	YES	2.90499e-07	64.4042	FC922919	KN0AAM1CA02RM1 SLH Citrus sinensis cDNA clone KN0AAM1CA02, mRNA sequence.
ePt_644152	YES	2.88173e-07	66.2076	FN711662	FN711662 WZOAQPAB Quercus petraea cDNA clone WZ0AQPAB4YC23FM1, mRNA sequence.
ePt_571616	YES	2.83415e-07	66.2076	EV523454	JB2_48_B04 Castor seed endosperm Ricinus communis cDNA 5', mRNA sequence.
ePt_573137	YES	2.77403e-07	64.4042	EG558747	CR03025E03 Root CR03 cDNA library Catharanthus roseus cDNA clone CR03025E03 5', mRNA sequence.
ePt_640641	YES	2.76619e-07	66.2076	EE105989	SCB01825 Inflorescence with GA3 (VvS12) Vitis vinifera cDNA clone SCB01825, mRNA sequence.
ePt_504287	YES	2.76279e-07	66.2076	EC993941	WIN1149.C21_O09 Muscat Hamburg pre-veraison berry normalized (WIN11) Vitis vinifera cDNA clone WIN1149_O09 3', mRNA sequence.
ePt_571022	YES	2.70259e-07	64.4042	BM320291	rs87g06.y1 Pristionchus pacificus mixed stage SL1 TOPO v1 Murphy Chiapelli McCarter Pristionchus pacificus cDNA 5' similar to TR:Q57170 Q57170 BETA-GALACTOSIDASE ALPHA-PEPTIDE ;, mRNA sequence.
ePt_643662	YES	2.68123e-07	66.2076	ES592394	000001602252_M22.ab1 Eucalyptus globulus under low temperature Eucalyptus globulus cDNA, mRNA sequence.
ePt_641916	YES	2.45257e-07	64.4042	EY822053	PT11-C1-901-040-D10-CT.F Poncirus trifoliata leaf, infected with CTV Citrus trifoliata cDNA, mRNA sequence.
ePt_641155	YES	2.40597e-07	66.2076	DT750510	EST1184359 Aquilegia cDNA library Aquilegia formosa x Aquilegia pubescens cDNA clone CO1WR01, mRNA sequence.
ePt_644114	YES	2.3482e-07	66.2076	CN914413	030107ABNB001406HT (ABNB) Braeburn cultured fruit cells, boron exposed, phytoremediation Malus x domestica cDNA clone ABNB001406, mRNA sequence.
ePt_570113	YES	2.25645e-07	66.2076	EY747722	CS00-C5-003-048-C04-CT.F Sweet orange flower, greenhouse plant Citrus sinensis cDNA, mRNA sequence.
ePt_503560	YES	2.17557e-07	66.2076	GR860207	CCCC23289.b1 CCCC Glycine max callus grown in dark condition Glycine max cDNA clone CCCC23289 5', mRNA sequence.
ePt_567958	YES	2.06662e-07	66.2076	EH674581	CCIL12510.b1_K08.ab1 CCI(LMS) chicory Cichorium intybus cDNA clone CCIL12510, mRNA sequence.
ePt_504220	YES	2.01206e-07	64.4042	GE555201	CCHT13549.b1_J03.ab1 CCHT Niger Seed Guizotia abyssinica cDNA clone CCHT13549, mRNA sequence.
ePt_641589	YES	1.97635e-07	64.4042	GW867023	48F07 Flax fiber enriched Lambda ZapII Library Linum usitatissimum cDNA 3', mRNA sequence.
ePt_564272	YES	1.97129e-07	66.2076	DN490325	UK116TA12.3pR Populus apical shoot cDNA library Populus tremula x Populus tremuloides cDNA clone UK116TA12 3', mRNA sequence.
ePt_565242	YES	1.96448e-07	66.2076	FN730486	FN730486 WZOAQPAC Quercus petraea cDNA clone WZ0AQPAI11YJ03FM1, mRNA sequence.
ePt_641881	YES	1.95767e-07	66.2076	DW494242	GH_RMIRS_101_C08_R Cotton Normalized Library random primed Gossypium hirsutum cDNA, mRNA sequence.
ePt_642841	YES	1.95767e-07	66.2076	DW494242	GH_RMIRS_101_C08_R Cotton Normalized Library random primed Gossypium hirsutum cDNA, mRNA sequence.
ePt_572470	YES	1.87596e-07	66.2076	BE942494	EST422073 MGHG Medicago truncatula cDNA clone pMGHG-8P17, mRNA sequence.
ePt_503042	YES	1.84532e-07	66.2076	ES838647	UFL_045_55 Cotton fiber 0-10 day post anthesis Gossypium hirsutum cDNA, mRNA sequence.
ePt_503899	YES	1.84532e-07	66.2076	ES838647	UFL_045_55 Cotton fiber 0-10 day post anthesis Gossypium hirsutum cDNA, mRNA sequence.
ePt_503957	YES	1.84532e-07	66.2076	ES838647	UFL_045_55 Cotton fiber 0-10 day post anthesis Gossypium hirsutum cDNA, mRNA sequence.
ePt_637352	YES	1.84532e-07	66.2076	ES838647	UFL_045_55 Cotton fiber 0-10 day post anthesis Gossypium hirsutum cDNA, mRNA sequence.
ePt_642125	YES	1.84532e-07	66.2076	ES838647	UFL_045_55 Cotton fiber 0-10 day post anthesis Gossypium hirsutum cDNA, mRNA sequence.
ePt_565402	YES	1.83511e-07	66.2076	GD077222	KS17019A02 KS17 Capsicum annuum cDNA, mRNA sequence.
ePt_641350	YES	1.78404e-07	66.2076	GD077222	KS17019A02 KS17 Capsicum annuum cDNA, mRNA sequence.
ePt_502955	YES	1.78063e-07	66.2076	ES591387	000001601852_K11.ab1 Eucalyptus globulus under low temperature Eucalyptus globulus cDNA, mRNA sequence.
ePt_638583	YES	1.69552e-07	66.2076	GO557478	Mdlr7002K03_e24053.b1 Apple_EST_Mdlr Malus x domestica cDNA 3' similar to emb|CAD36200.1| TIR-NBS disease resistance protein [Populus balsamifera subsp. trichocarpa], mRNA sequence.
ePt_641093	YES	1.61721e-07	66.2076	GW594069	1403923M23.F.ab1_c Coleochaete orbicularis EST library Coleochaete orbicularis cDNA 5', mRNA sequence.
ePt_570691	YES	1.59678e-07	66.2076	FN730486	FN730486 WZOAQPAC Quercus petraea cDNA clone WZ0AQPAI11YJ03FM1, mRNA sequence.
ePt_563135	YES	1.55252e-07	66.2076	CB863874	HH07E15y HH Hordeum vulgare cDNA clone HH07E15 3-PRIME, mRNA sequence.
ePt_638750	YES	1.50145e-07	66.2076	GO332667	VBL6_39_N03_E001.g1 Normalized cDNA library from developing embryos of peanut Arachis hypogaea cDNA, mRNA sequence.
ePt_639142	YES	1.49124e-07	66.2076	DY676124	STRBR65JX cold-stressed Fragaria vesca seedlings cDNA library Fragaria vesca cDNA clone STRBR65, mRNA sequence.
ePt_504289	YES	1.46741e-07	66.2076	CV197118	CGF1003508_G11 Seed coat from mid-season walnut embryos collected Aug 1 Juglans regia cDNA clone WSC0006_IIF_G11 5', mRNA sequence.
ePt_563426	YES	1.44698e-07	66.2076	FK476119	454GmaGlobSeed210751 Soybean Seeds Containing Globular-Stage Embryos Glycine max cDNA, mRNA sequence.
ePt_569753	YES	1.44698e-07	66.2076	FP052336	FP052336 LG0AAD Quercus robur cDNA clone LG0AAD7YD10RM1, mRNA sequence.
ePt_637575	YES	1.39931e-07	66.2076	AJ627783	AJ627783 Eucalyptus gunnii differentiating xylem Eucalyptus gunnii cDNA clone RTAB DNA-10F04, mRNA sequence.
ePt_503672	YES	1.36186e-07	66.2076	ES593277	000001602552_M12.ab1 Eucalyptus globulus under low temperature Eucalyptus globulus cDNA, mRNA sequence.
ePt_566727	YES	1.35505e-07	66.2076	FP052336	FP052336 LG0AAD Quercus robur cDNA clone LG0AAD7YD10RM1, mRNA sequence.
ePt_562873	YES	1.33462e-07	66.2076	HO794540	vsu-ars_019573_LI15contig_2535 VSU-ARS-L15 Phaseolus acutifolius cDNA, mRNA sequence.
ePt_640060	YES	1.26653e-07	66.2076	DY973424	CLSM7117.b1_I04.ab1 CLS(LMS) lettuce sativa Lactuca sativa cDNA clone CLSM7117, mRNA sequence.
ePt_641611	YES	1.26653e-07	66.2076	DY670166	STRBK30JX cold-stressed Fragaria vesca seedlings cDNA library Fragaria vesca cDNA clone STRBK30, mRNA sequence.
ePt_640773	YES	1.1664e-07	68.0109	GR874759	Pq_R_02242 American ginseng Root cDNA Library Panax quinquefolius cDNA 5', mRNA sequence.
ePt_571015	YES	1.16099e-07	66.2076	GR025875	CCIC11991.g1 CCIC Mimulus guttatus IM62 roots (H) Mimulus guttatus cDNA clone CCIC11991 3', mRNA sequence.
ePt_564666	YES	1.15418e-07	66.2076	DV167140	ZM_BFb0165B04.r ZM_BFb Zea mays cDNA 5', mRNA sequence.
ePt_568891	YES	1.15418e-07	66.2076	DV167140	ZM_BFb0165B04.r ZM_BFb Zea mays cDNA 5', mRNA sequence.
ePt_566671	YES	1.14056e-07	66.2076	CT987043	CT987043 Eucalyptus gunnii differentiating xylem AFOCEL clone 832 Eucalyptus gunnii cDNA, mRNA sequence.
ePt_637659	YES	1.14056e-07	66.2076	DY653226	PU4_plate35_K20 PU4 Prunus persica cDNA similar to expressed mRNA inferred from CD2-binding protein-related [Arabidopsis thaliana], mRNA sequence.
ePt_574070	YES	1.11332e-07	66.2076	FS329487	FS329487 LjFL3 Lotus japonicus cDNA clone LjFL3-034-BB01 5', mRNA sequence.
ePt_569994	YES	1.10992e-07	66.2076	FS329487	FS329487 LjFL3 Lotus japonicus cDNA clone LjFL3-034-BB01 5', mRNA sequence.
ePt_642586	YES	1.10651e-07	66.2076	FS329487	FS329487 LjFL3 Lotus japonicus cDNA clone LjFL3-034-BB01 5', mRNA sequence.
ePt_641659	YES	1.08268e-07	66.2076	DW496480	GH_TMIRS_006_E08_F Cotton Normalized Library dT primed Gossypium hirsutum cDNA, mRNA sequence.
ePt_502892	YES	9.44858e-08	66.2076	BP135113	BP135113 MAT001 Nicotiana tabacum cDNA clone BY7586, mRNA sequence.
ePt_503680	YES	9.41447e-08	66.2076	FP033920	FP033920 LG0AAB Quercus robur cDNA clone LG0AAB4YA03RM1 similar to PplGI.3|TC48454 similar to UP|Q676U0_PINSY Disease resistance gene, mRNA sequence.
ePt_574961	YES	9.27803e-08	66.2076	EH776861	CNSM9161.b1_B12.ab1 CNS(LMS) yellow starthistle Centaurea solstitialis cDNA clone CNSM9161, mRNA sequence.
ePt_567873	YES	9.24392e-08	66.2076	ES591403	000001601852_L08.ab1 Eucalyptus globulus under low temperature Eucalyptus globulus cDNA, mRNA sequence.
ePt_567537	YES	8.84046e-08	68.0109	CT987205	CT987205 Eucalyptus gunnii differentiating xylem AFOCEL clone 832 Eucalyptus gunnii cDNA, mRNA sequence.
ePt_566405	YES	8.05005e-08	66.2076	GE549087	CCHS7933.b1_I16.ab1 CCHS Espina Barnadesia spinosa cDNA clone CCHS7933, mRNA sequence.
ePt_572354	YES	7.60662e-08	66.2076	ES591403	000001601852_L08.ab1 Eucalyptus globulus under low temperature Eucalyptus globulus cDNA, mRNA sequence.
ePt_574209	YES	7.55529e-08	68.0109	DW345634	PP_LEc0002O20f Peach shoot Prunus persica cDNA clone PP_LEc0002O20f, mRNA sequence.
ePt_643107	YES	7.40195e-08	66.2076	EY708603	CS00-C3-701-084-H05-CT.F Sweet orange fruit, development stadium (2 of 6) Citrus sinensis cDNA, mRNA sequence.
ePt_563495	YES	7.29962e-08	66.2076	HS269218	CCXA12745.b1 CCXA Euonymus alatus seed tissues collected from 8/14 to 9/19/2007 normalized Euonymus alatus cDNA clone CCXA12745 5', mRNA sequence.
ePt_568361	YES	7.17557e-08	68.0109	FP036067	FP036067 LG0AAB Quercus robur cDNA clone LG0AAB25YH09RM1, mRNA sequence.
ePt_639533	YES	6.81533e-08	68.0109	FG533996	MERIP0023G12.B MeriP Pisum sativum Shoot apical meristem ESTs Pisum sativum cDNA clone MERIP0023G12.B, mRNA sequence.
ePt_574214	YES	6.61087e-08	68.0109	GE513546	CCFT9010.b1_D21.ab1 CCF(STU) sunflower Helianthus annuus cDNA clone CCFT9010, mRNA sequence.
ePt_504826	YES	6.10631e-08	68.0109	FC882728	IC0AAA99DD10RM1 IVIA1 Citrus clementina cDNA clone IC0AAA99DD10, mRNA sequence.
ePt_637592	YES	6.06729e-08	68.0109	BJ315424	BJ315424 Y. Ogihara unpublished cDNA library, Wh_yf Triticum aestivum cDNA clone whyf18f05 5', mRNA sequence.
ePt_640349	YES	5.52104e-08	68.0109	FK476119	454GmaGlobSeed210751 Soybean Seeds Containing Globular-Stage Embryos Glycine max cDNA, mRNA sequence.
ePt_571091	YES	5.49178e-08	68.0109	CO816853	FA_SEa0003F01r Fragaria x ananassa 'Strawberry Festival' cultivar 24h after treatment with salicylic acid Fragaria x ananassa cDNA clone FA_SEa0003F01r, mRNA sequence.
ePt_641723	YES	5.49178e-08	68.0109	DN490325	UK116TA12.3pR Populus apical shoot cDNA library Populus tremula x Populus tremuloides cDNA clone UK116TA12 3', mRNA sequence.
ePt_640156	YES	5.47227e-08	68.0109	FS446889	FS446889 full-length enriched Striga hermonthica cDNA library Striga hermonthica cDNA clone SHAA-aaf45h12 3', mRNA sequence.
ePt_562982	YES	5.46252e-08	68.0109	CB821773	EST 2624 Half-Ripe Apricot Fruit Lambda Zap II Library Prunus armeniaca cDNA clone be003o16 3', mRNA sequence.
ePt_637032	YES	5.36497e-08	68.0109	DW345365	PP_LEc0022K22f Peach shoot Prunus persica cDNA clone PP_LEc0022K22f, mRNA sequence.
ePt_563205	YES	5.25767e-08	68.0109	CU571542	CU571542 HYPO23I_KZ0AAP Theobroma cacao cDNA clone KZ0AAP10YK20FM1, mRNA sequence.
ePt_643834	YES	5.24792e-08	68.0109	CT986874	CT986874 Eucalyptus gunnii differentiating xylem AFOCEL clone 832 Eucalyptus gunnii cDNA, mRNA sequence.
ePt_642561	YES	5.13086e-08	68.0109	CU399187	CU399187 LG0ABA Eucalyptus gunnii cDNA, mRNA sequence.
ePt_562838	YES	5.08209e-08	68.0109	DV850119	GH_LSL28C06.f GH_LSL Gossypium hirsutum cDNA clone GH_LSL28C06 5', mRNA sequence.
ePt_639045	YES	4.74068e-08	68.0109	HS266403	CCXA11154.g1 CCXA Euonymus alatus seed tissues collected from 8/14 to 9/19/2007 normalized Euonymus alatus cDNA clone CCXA11154 3', mRNA sequence.
ePt_642562	YES	4.46756e-08	68.0109	DW240974	GH_TS_1-03-02_B11_LibSeq2_26Nov03_093 Stem - 3-5 weeks after planting Gossypium hirsutum cDNA, mRNA sequence.
ePt_639703	YES	4.19443e-08	68.0109	FP026037	FP026037 LG0AAA Quercus robur cDNA clone LG0AAA6YB09RM1 similar to A2Q4B8_MEDTR CMP/dCMP deaminase, zinc-binding. - Medicago truncatula, mRNA sequence.
ePt_504751	YES	3.77499e-08	68.0109	FL016901	22209960 CERES-504 Zea mays cDNA clone 1598341 5', mRNA sequence.
ePt_638818	YES	3.77499e-08	68.0109	FL016901	22209960 CERES-504 Zea mays cDNA clone 1598341 5', mRNA sequence.
ePt_574959	YES	3.65793e-08	68.0109	EX168145	E01_R15_003 Cotton 1-14 day post anthesis Lambda Zap Express Library Gossypium hirsutum cDNA, mRNA sequence.
ePt_503273	YES	3.5799e-08	68.0109	HS271845	CCXA14180.g1 CCXA Euonymus alatus seed tissues collected from 8/14 to 9/19/2007 normalized Euonymus alatus cDNA clone CCXA14180 3', mRNA sequence.
ePt_567747	YES	3.56039e-08	68.0109	EX275473	1456637_5_I11_040 PY06 Carica papaya cDNA, mRNA sequence.
ePt_600181	YES	3.56039e-08	68.0109	EX275473	1456637_5_I11_040 PY06 Carica papaya cDNA, mRNA sequence.
ePt_569880	YES	3.46284e-08	68.0109	CF543301	S014665-024-029-O23-SP6 MPIZ-ADIS-024-leaf Beta vulgaris cDNA clone 024-029-O23 5-PRIME, mRNA sequence.
ePt_641333	YES	3.4516e-08	66.2076	DB888468	DB888468 full-length enriched poplar cDNA library, mixture of leaf, bud, stem, root Populus nigra cDNA clone PnFL2-077_B06 5', mRNA sequence.
ePt_574377	YES	3.33604e-08	68.0109	FG438541	010304KADA029224HT (KADA) A. deliciosa ripe fruit inner cortex Actinidia deliciosa cDNA clone KADAA02922, mRNA sequence.
ePt_637123	YES	3.12144e-08	68.0109	GR333919	CCOU1407.g1 CCOU Avena barbata leaf, pooled from different levels of rain and nitrogen (H) Avena barbata cDNA clone CCOU1407 3', mRNA sequence.
ePt_571120	YES	3.0434e-08	68.0109	FN735476	FN735476 WZOAQPAC Quercus petraea cDNA clone WZ0AQPAC7YN24CM1, mRNA sequence.
ePt_563220	YES	3.01414e-08	68.0109	CU399743	CU399743 LG0ABA Eucalyptus gunnii cDNA, mRNA sequence.
ePt_504040	YES	2.88297e-08	68.0109	FP034043	FP034043 LG0AAB Quercus robur cDNA clone LG0AAB3YK08RM1 similar to PplGI.3|TC63938 similar to UP|Q5ZDJ3_ORYSA Acetyltransferase 1-like, mRNA sequence.
ePt_640786	YES	2.86199e-08	69.8143	EX270343	1450943_5_L05_021 PY06 Carica papaya cDNA, mRNA sequence.
ePt_642215	YES	2.84804e-08	69.8143	GE636210	LINN_XX_013_N19_LINN13.CR_N19 R. communis developing seed Ricinus communis cDNA, mRNA sequence.
ePt_642121	YES	2.84388e-08	68.0109	EL624075	EST1581 3-9 DAP Brassica Napus seed cDNA library Brassica napus cDNA clone B067C071, mRNA sequence.
ePt_600156	YES	2.82434e-08	68.0109	DV455700	CV02019B1B02.f1 CV02-normalized library Manihot esculenta cDNA clone CV02019B1B02.f1, mRNA sequence.
ePt_643213	YES	2.58305e-08	69.8143	CF606766	GEMMA01_000160 Grape Bud pSPORT1 Library Vitis vinifera cDNA 5', mRNA sequence.
ePt_569576	YES	2.29573e-08	69.8143	EC936839	WIN0513.C21_K19 Cab Sauv flower, leaf and root normalized (WIN05) Vitis vinifera cDNA clone WIN0513_K19 3', mRNA sequence.
ePt_637643	YES	2.03352e-08	69.8143	AM724334	AM724334 Cucumis melo subsp. melo Cantaloupe C-35 leaf 15 days after pollination healthy Cucumis melo subsp. melo cDNA, mRNA sequence.
ePt_575750	YES	1.95456e-08	68.0109	GE550460	CCHS9231.b1_M03.ab1 CCHS Espina Barnadesia spinosa cDNA clone CCHS9231, mRNA sequence.
ePt_569904	YES	1.91078e-08	69.8143	DY652762	PU4_plate12_J07 PU4 Prunus persica cDNA similar to weakly similar to Ku70-like protein [Arabidopsis thaliana] contains InterProScan IPR003034: DNA-binding SAP, IPR005160: Ku70/Ku80 C-terminal arm, mRNA sequence.
ePt_567143	YES	1.90569e-08	68.0109	CB343568	CA32EN0005_IVaF_A02 Cabernet Sauvignon Leaf - CA32EN Vitis vinifera cDNA clone CA32EN0005_IVaF_A02 5', mRNA sequence.
ePt_503932	YES	1.87173e-08	69.8143	GT969085	TeaEST_295 TEASSHUBKV Camellia sinensis var. assamica cDNA clone FS700, mRNA sequence.
ePt_599632	YES	1.86057e-08	69.8143	GO613481	571 ethophon treated Ophiopogon japonicus ( L. f . ) KerGawl cDNA library Ophiopogon japonicus cDNA 3', mRNA sequence.
ePt_570592	YES	1.83053e-08	69.8143	CU569584	CU569584 MIRIDUFS_KZ0ACAD Theobroma cacao cDNA clone KZ0ACAD8YN09FM1, mRNA sequence.
ePt_504270	YES	1.76626e-08	69.8143	CJ772527	CJ772527 Ipomoea nil shoot 8-days old seedling Ipomoea nil cDNA clone jmsf45o18 3', mRNA sequence.
ePt_571689	YES	1.66285e-08	69.8143	DT515323	WS02427.B21_E02 PTxD-ICC-N-A-14 Populus trichocarpa x Populus deltoides cDNA clone WS02427_E02 3', mRNA sequence.
ePt_637416	YES	1.63211e-08	69.8143	GO034651	LJNAY12TF JCVI-LJ3 Lotus japonicus cDNA 5', mRNA sequence.
ePt_637545	YES	1.60416e-08	69.8143	GT044355	CLS_cLiFproots_55a2_1_g04cLibkit5LD_D02 CLS_cLiFproots_plant Festuca arundinacea cDNA clone 55g04 5', mRNA sequence.
ePt_505038	YES	1.59578e-08	69.8143	GT044355	CLS_cLiFproots_55a2_1_g04cLibkit5LD_D02 CLS_cLiFproots_plant Festuca arundinacea cDNA clone 55g04 5', mRNA sequence.
ePt_563476	YES	1.59298e-08	69.8143	GT044355	CLS_cLiFproots_55a2_1_g04cLibkit5LD_D02 CLS_cLiFproots_plant Festuca arundinacea cDNA clone 55g04 5', mRNA sequence.
ePt_637185	YES	1.58181e-08	69.8143	EX669635	JS3BD80JG Heat stressed Fragaria vesca (strain Hawaii-4) cDNA library Fragaria vesca cDNA clone JS3BD80, mRNA sequence.
ePt_642539	YES	1.52032e-08	69.8143	CU401938	CU401938 LG0ABA Eucalyptus gunnii cDNA, mRNA sequence.
ePt_600263	YES	1.51753e-08	69.8143	CU401938	CU401938 LG0ABA Eucalyptus gunnii cDNA, mRNA sequence.
ePt_639472	YES	1.4812e-08	69.8143	FR600092	FR600092 WZOAFSCA Fagus sylvatica cDNA clone WZ0AFSCA19YJ09NM1, mRNA sequence.
ePt_568434	YES	1.4253e-08	69.8143	CO115409	GR__Eb017C07.r GR__Eb Gossypium raimondii cDNA clone GR__Eb017C07 3', mRNA sequence.
ePt_504167	YES	1.42251e-08	69.8143	AM836373	AM836373 DL, diurnal library Nicotiana tabacum cDNA clone nt005222071, mRNA sequence.
ePt_570515	YES	1.34984e-08	69.8143	CT981462	CT981462 Eucalyptus gunnii differentiating xylem AFOCEL clone 832 Eucalyptus gunnii cDNA, mRNA sequence.
ePt_503993	YES	1.33159e-08	68.0109	FK000674	GLPAI03TR JCVI-SOY1 Glycine max cDNA 5', mRNA sequence.
ePt_566392	YES	1.33159e-08	68.0109	FK000674	GLPAI03TR JCVI-SOY1 Glycine max cDNA 5', mRNA sequence.
ePt_599975	YES	1.33028e-08	69.8143	FC864976	PPN023H05-T7 PPN Prunus persica cDNA clone PPN023H05, mRNA sequence.
ePt_564622	YES	1.3219e-08	69.8143	HS080186	KYERRC001_45-H06-T3.ab1 Panax ginseng in vitro-cultured adventitious root cDNA library Panax ginseng cDNA, mRNA sequence.
ePt_504104	YES	1.30792e-08	69.8143	CU399074	CU399074 LG0ABA Eucalyptus gunnii cDNA, mRNA sequence.
ePt_504766	YES	1.23247e-08	69.8143	FD381314	CeSi_F10_T3_C03_027 Ceratonia siliqua flowers cDNA library Ceratonia siliqua cDNA clone CeSi_F10_C03_027, mRNA sequence.
ePt_567405	YES	1.22967e-08	69.8143	FD381314	CeSi_F10_T3_C03_027 Ceratonia siliqua flowers cDNA library Ceratonia siliqua cDNA clone CeSi_F10_C03_027, mRNA sequence.
ePt_567691	YES	1.22967e-08	69.8143	FD381314	CeSi_F10_T3_C03_027 Ceratonia siliqua flowers cDNA library Ceratonia siliqua cDNA clone CeSi_F10_C03_027, mRNA sequence.
ePt_503696	YES	1.20172e-08	69.8143	CJ772527	CJ772527 Ipomoea nil shoot 8-days old seedling Ipomoea nil cDNA clone jmsf45o18 3', mRNA sequence.
ePt_563890	YES	1.08435e-08	69.8143	GW878327	JC002704 Seed specific Normalized cDNA library from Jatropha curcas L. Jatropha curcas cDNA clone N05116 5' similar to Unknown protein, mRNA sequence.
ePt_571763	YES	1.07596e-08	69.8143	HO055504	Cp0486 Cuphea paucipetala PI 534875 embryo Cuphea paucipetala cDNA clone Cp0486, mRNA sequence.
ePt_574194	YES	1.02845e-08	69.8143	AM716695	AM716695 Cucumis melo subsp. agrestis pat81 root 46 days after pollination infected with M. cannonballus Cucumis melo subsp. agrestis cDNA, mRNA sequence.
ePt_574308	YES	1.00889e-08	69.8143	EY110081	CAZI6615.rev CAZI Artemisia annua normalized leaf library Artemisia annua cDNA clone CAZI6615 3', mRNA sequence.
ePt_599330	YES	9.97711e-09	69.8143	EY110081	CAZI6615.rev CAZI Artemisia annua normalized leaf library Artemisia annua cDNA clone CAZI6615 3', mRNA sequence.
ePt_643127	YES	9.5579e-09	69.8143	FL804718	CCGG5271.b1 CCGG Panicum virgatum late flowering buds + seed development (H) Panicum virgatum cDNA clone CCGG5271 5', mRNA sequence.
ePt_566966	YES	9.44611e-09	69.8143	DT002770	Mdrta1017C13.g1 Apple_EST_Mdrta Malus x domestica cDNA similar to ref|NP_178330.1| leucine-rich repeat transmembrane protein kinase, putative [Arabidopsis thaliana] sp|Q9ZVR7|PSKR_ARATH Putative phytosulfokine receptor precursor (Phytosulfokine LRR receptor kinase) pir|D84434 probable receptor-like protein kinas, mRNA sequence.
ePt_570972	YES	9.44611e-09	69.8143	DB935504	DB935504 full-length enriched cassava cDNA library Manihot esculenta cDNA clone CAS01_043_J22 5', mRNA sequence.
ePt_573717	YES	9.44611e-09	69.8143	DT002770	Mdrta1017C13.g1 Apple_EST_Mdrta Malus x domestica cDNA similar to ref|NP_178330.1| leucine-rich repeat transmembrane protein kinase, putative [Arabidopsis thaliana] sp|Q9ZVR7|PSKR_ARATH Putative phytosulfokine receptor precursor (Phytosulfokine LRR receptor kinase) pir|D84434 probable receptor-like protein kinas, mRNA sequence.
ePt_574325	YES	9.44611e-09	69.8143	DT002770	Mdrta1017C13.g1 Apple_EST_Mdrta Malus x domestica cDNA similar to ref|NP_178330.1| leucine-rich repeat transmembrane protein kinase, putative [Arabidopsis thaliana] sp|Q9ZVR7|PSKR_ARATH Putative phytosulfokine receptor precursor (Phytosulfokine LRR receptor kinase) pir|D84434 probable receptor-like protein kinas, mRNA sequence.
ePt_503636	YES	9.02691e-09	69.8143	BM061402	KS01030B12 KS01 Capsicum annuum cDNA, mRNA sequence.
ePt_639713	YES	8.11986e-09	69.8143	FK019312	GLND919TF JCVI-SOY3 Glycine max cDNA 5', mRNA sequence.
ePt_640846	YES	8.00786e-09	69.8143	CD668929	eef1c.pk001.l22 eef1c Eucalyptus tereticornis cDNA clone eef1c.pk001.l22 5' end, mRNA sequence.
ePt_565892	YES	7.97986e-09	69.8143	CD668929	eef1c.pk001.l22 eef1c Eucalyptus tereticornis cDNA clone eef1c.pk001.l22 5' end, mRNA sequence.
ePt_642141	YES	7.95186e-09	69.8143	FS182603	FS182603 Solanum lycopersicum cv Micro-Tom root Solanum lycopersicum cDNA clone LEFL3017N15 5', mRNA sequence.
ePt_573577	YES	7.53187e-09	69.8143	EX264625	1445141_5_J11_040 PY06 Carica papaya cDNA, mRNA sequence.
ePt_503889	YES	7.19587e-09	69.8143	DV850119	GH_LSL28C06.f GH_LSL Gossypium hirsutum cDNA clone GH_LSL28C06 5', mRNA sequence.
ePt_503508	YES	7.0489e-09	71.6177	AM741449	AM741449 Cucumis melo subsp. melo Piel de Sapo T-111 fruit 46 days after pollination Cucumis melo subsp. melo cDNA, mRNA sequence.
ePt_503618	YES	6.60789e-09	69.8143	FL676283	CIRGN002A12 CiRG Cichorium intybus cDNA 3', mRNA sequence.
ePt_504258	YES	6.56939e-09	71.6177	EX170811	H04_F12_032 Cotton 1-14 day post anthesis Lambda Zap Express Library Gossypium hirsutum cDNA, mRNA sequence.
ePt_503947	YES	6.31364e-09	71.6177	CO818805	CSECS119H09_PREn0028 CabSau Normalised Berry Fruit Set Stage 28 (PREn0028) Vitis vinifera cDNA clone CSECS119H09 3', mRNA sequence.
ePt_572110	YES	6.27189e-09	69.8143	FS089150	FS089150 library SmFL Solanum melongena cDNA clone SmFL33I22 3', mRNA sequence.
ePt_566035	YES	5.91405e-09	71.6177	AJ827743	AJ827743 S3 Prunus persica cDNA clone S315O15, mRNA sequence.
ePt_563461	YES	5.89806e-09	71.6177	CF403384	CSECS005E01_PREu0032 CabSau Berry Preveraison Stage 32 (PREu0032) Vitis vinifera cDNA clone CSECS005E01 3', mRNA sequence.
ePt_568634	YES	5.78617e-09	71.6177	GD100168	KS21010P19 KS21 Capsicum annuum cDNA, mRNA sequence.
ePt_504199	YES	5.37858e-09	71.6177	CN914026	030120ABMA006487HT (ABMA) M9 phloem Malus x domestica cDNA clone ABMA006487, mRNA sequence.
ePt_600543	YES	5.2766e-09	71.6177	CJ762922	CJ762922 Ipomoea nil shoot 8-days old seedling Ipomoea nil cDNA clone jmsf2b20 3', mRNA sequence.
ePt_641594	YES	4.57999e-09	71.6177	BJ857573	BJ857573 Marchantia polymorpha thallus E Marchantia polymorpha cDNA clone lwa9l03 5', mRNA sequence.
ePt_566625	YES	4.52394e-09	71.6177	FR605675	FR605675 WZOAFSCA Fagus sylvatica cDNA clone WZ0AFSCA2YK24NM1, mRNA sequence.
ePt_644210	YES	4.49191e-09	71.6177	FP027581	FP027581 LG0AAA Quercus robur cDNA clone LG0AAA20YN16RM1 similar to PplGI.3|TC43802 similar to UP|Q9FH96_ARATH Gb|AAD41995.1, mRNA sequence.
ePt_504317	YES	4.33978e-09	71.6177	ES838647	UFL_045_55 Cotton fiber 0-10 day post anthesis Gossypium hirsutum cDNA, mRNA sequence.
ePt_567590	YES	4.06754e-09	71.6177	ES591387	000001601852_K11.ab1 Eucalyptus globulus under low temperature Eucalyptus globulus cDNA, mRNA sequence.
ePt_569057	YES	3.96345e-09	71.6177	CD668584	eec1c.pk004.c4 eec1c Eucalyptus tereticornis cDNA clone eec1c.pk004.c4 5' end, mRNA sequence.
ePt_637165	YES	3.94744e-09	71.6177	DW345365	PP_LEc0022K22f Peach shoot Prunus persica cDNA clone PP_LEc0022K22f, mRNA sequence.
ePt_503690	YES	3.79531e-09	71.6177	GW828094	FES015A08_1289 Ficus elastica stem cDNA library (FES) Ficus elastica cDNA clone FES015A08, mRNA sequence.
ePt_637861	YES	3.68321e-09	71.6177	EY844608	CA26-C1-002-036-H01-CT.F Sour orange leaf, field plant Citrus aurantium cDNA, mRNA sequence.
ePt_639890	YES	3.61115e-09	71.6177	FG470827	021002KALA013335HT (KALA) Dormant kiwifruit buds three days after hydrogen cyanamide treatment Actinidia deliciosa cDNA clone KALAA01333, mRNA sequence.
ePt_563528	YES	3.49905e-09	71.6177	CB185840	EST01031 Arabidopsis virulent Pseudomonas syringae subtracted library Arabidopsis thaliana cDNA clone DC2-F4 similar to sucrose-phosphate synthase-like protein, mRNA sequence.
ePt_504143	YES	3.25884e-09	71.6177	FC876020	C31304E02EF CTVMacrop1 Citrus macrophylla cDNA clone C31304E02, mRNA sequence.
ePt_565994	YES	3.25083e-09	71.6177	BI270658	NF056D05FL1F1046 Developing flower Medicago truncatula cDNA clone NF056D05FL 5', mRNA sequence.
ePt_643850	YES	3.13873e-09	71.6177	EH702492	CCIS14491.b1_E24.ab1 CCI(LMS) chicory Cichorium intybus cDNA clone CCIS14491, mRNA sequence.
ePt_504110	YES	3.0987e-09	71.6177	DV115128	CV03010B2D04.f1 CV03-normalized library Euphorbia esula cDNA clone CV03010B2D04.f1 5, mRNA sequence.
ePt_503888	YES	3.00262e-09	71.6177	EX168145	E01_R15_003 Cotton 1-14 day post anthesis Lambda Zap Express Library Gossypium hirsutum cDNA, mRNA sequence.
ePt_504448	YES	3.00262e-09	71.6177	EX168145	E01_R15_003 Cotton 1-14 day post anthesis Lambda Zap Express Library Gossypium hirsutum cDNA, mRNA sequence.
ePt_571991	YES	2.84248e-09	71.6177	FF538955	MOPAQ91TF MOP Vigna unguiculata cDNA 5', mRNA sequence.
ePt_641696	YES	2.83325e-09	69.8143	FN749424	FN749424 WZOAQRAP Quercus robur cDNA clone WZ0AQRAP13YO11FM1, mRNA sequence.
ePt_505072	YES	2.82646e-09	71.6177	FF538955	MOPAQ91TF MOP Vigna unguiculata cDNA 5', mRNA sequence.
ePt_644195	YES	2.82646e-09	71.6177	FF538955	MOPAQ91TF MOP Vigna unguiculata cDNA 5', mRNA sequence.
ePt_567703	YES	2.73839e-09	71.6177	AM716695	AM716695 Cucumis melo subsp. agrestis pat81 root 46 days after pollination infected with M. cannonballus Cucumis melo subsp. agrestis cDNA, mRNA sequence.
ePt_570473	YES	2.73839e-09	71.6177	DT023707	VVI113E09_600542 CabSau Flower Stage 12 (FLOu0012) Vitis vinifera cDNA clone VVI113E09 5, mRNA sequence.
ePt_504063	YES	2.51419e-09	71.6177	CT981865	CT981865 Eucalyptus gunnii differentiating xylem AFOCEL clone 832 Eucalyptus gunnii cDNA, mRNA sequence.
ePt_574817	YES	2.51419e-09	71.6177	FN735982	FN735982 WZOAQPAC Quercus petraea cDNA clone WZ0AQPAC10YH20FM1, mRNA sequence.
ePt_571179	YES	2.4101e-09	71.6177	DV134479	CV03108B1G04.f1 CV03-normalized library Euphorbia esula cDNA clone CV03108B1G04.f1 5, mRNA sequence.
ePt_636848	YES	2.35842e-09	73.4211	EX660567	JS1BB15JG Salt stressed Fragaria vesca (strain Hawaii-4) cDNA library Fragaria vesca cDNA clone JS1BB15, mRNA sequence.
ePt_574810	YES	2.3344e-09	71.6177	ES591403	000001601852_L08.ab1 Eucalyptus globulus under low temperature Eucalyptus globulus cDNA, mRNA sequence.
ePt_567818	YES	2.32638e-09	71.6177	ES591403	000001601852_L08.ab1 Eucalyptus globulus under low temperature Eucalyptus globulus cDNA, mRNA sequence.
ePt_642710	YES	2.32638e-09	71.6177	ES591403	000001601852_L08.ab1 Eucalyptus globulus under low temperature Eucalyptus globulus cDNA, mRNA sequence.
ePt_574405	YES	2.29429e-09	71.6177	DV134479	CV03108B1G04.f1 CV03-normalized library Euphorbia esula cDNA clone CV03108B1G04.f1 5, mRNA sequence.
ePt_575525	YES	2.25418e-09	71.6177	EE628801	CHEL11387.b1_E16.ab1 CHE(LMS) serpentine sunflower Helianthus exilis cDNA clone CHEL11387, mRNA sequence.
ePt_565531	YES	2.07908e-09	73.4211	EL415692	CHCL4344.b1_P05.ab1 CHC(LMS) Texas blueweed Helianthus ciliaris cDNA clone CHCL4344, mRNA sequence.
ePt_640470	YES	2.04244e-09	73.4211	DC883829	DC883829 ANT Citrus unshiu cDNA clone ANT0590 5', mRNA sequence.
ePt_567548	YES	2.02183e-09	73.4211	AM741449	AM741449 Cucumis melo subsp. melo Piel de Sapo T-111 fruit 46 days after pollination Cucumis melo subsp. melo cDNA, mRNA sequence.
ePt_563377	YES	2.00581e-09	73.4211	ES592394	000001602252_M22.ab1 Eucalyptus globulus under low temperature Eucalyptus globulus cDNA, mRNA sequence.
ePt_504324	YES	1.99748e-09	71.6177	CU399804	CU399804 LG0ABA Eucalyptus gunnii cDNA, mRNA sequence.
ePt_566054	YES	1.97341e-09	71.6177	CT987747	CT987747 Eucalyptus gunnii differentiating xylem AFOCEL clone 832 Eucalyptus gunnii cDNA, mRNA sequence.
ePt_575720	YES	1.90923e-09	71.6177	EH776861	CNSM9161.b1_B12.ab1 CNS(LMS) yellow starthistle Centaurea solstitialis cDNA clone CNSM9161, mRNA sequence.
ePt_503670	YES	1.88445e-09	73.4211	EG490449	AYBKH55TR pooled cDNA populations Arabidopsis thaliana cDNA, mRNA sequence.
ePt_563442	YES	1.87715e-09	71.6177	FL714354	CCGB2162.b1 CCGB Panicum virgatum apex + stem (L) Panicum virgatum cDNA clone CCGB2162 5', mRNA sequence.
ePt_600690	YES	1.79515e-09	73.4211	EY116012	CAZI9664.fwd CAZI Artemisia annua normalized leaf library Artemisia annua cDNA clone CAZI9664 5', mRNA sequence.
ePt_638284	YES	1.77683e-09	73.4211	FG475657	020308KALA006894HT (KALA) Dormant kiwifruit buds three days after hydrogen cyanamide treatment Actinidia deliciosa cDNA clone KALAA00689, mRNA sequence.
ePt_643855	YES	1.66693e-09	73.4211	DB921892	DB921892 full-length enriched cassava cDNA library Manihot esculenta cDNA clone CAS01_006_C16 5', mRNA sequence.
ePt_573790	YES	1.59638e-09	71.6177	EL396877	CFFM8165.b1_J01.ab1 CFF(LMS) safflower Carthamus tinctorius cDNA clone CFFM8165, mRNA sequence.
ePt_641744	YES	1.55627e-09	71.6177	DY649703	PU4_plate35_H13 PU4 Prunus persica cDNA similar to similar to calcium-transporting ATPase, plasma membrane-type, putative / Ca2+-ATPase, putative (ACA10) [Arabidopsis thaliana], mRNA sequence.
ePt_566619	YES	1.52496e-09	73.4211	GO613481	571 ethophon treated Ophiopogon japonicus ( L. f . ) KerGawl cDNA library Ophiopogon japonicus cDNA 3', mRNA sequence.
ePt_570801	YES	1.50489e-09	73.4211	BU760600	sas55h01.y1 Gm-c1023 Glycine max cDNA clone SOYBEAN CLONE ID: Gm-c1023-4945 5' similar to SW:SOT1_SPIOL Q41364 2-OXOGLUTARATE/MALATE TRANSLOCATOR PRECURSOR. ;, mRNA sequence.
ePt_574512	YES	1.50489e-09	73.4211	BU760600	sas55h01.y1 Gm-c1023 Glycine max cDNA clone SOYBEAN CLONE ID: Gm-c1023-4945 5' similar to SW:SOT1_SPIOL Q41364 2-OXOGLUTARATE/MALATE TRANSLOCATOR PRECURSOR. ;, mRNA sequence.
ePt_641778	YES	1.5003e-09	73.4211	BU760600	sas55h01.y1 Gm-c1023 Glycine max cDNA clone SOYBEAN CLONE ID: Gm-c1023-4945 5' similar to SW:SOT1_SPIOL Q41364 2-OXOGLUTARATE/MALATE TRANSLOCATOR PRECURSOR. ;, mRNA sequence.
ePt_643620	YES	1.5003e-09	73.4211	BU760600	sas55h01.y1 Gm-c1023 Glycine max cDNA clone SOYBEAN CLONE ID: Gm-c1023-4945 5' similar to SW:SOT1_SPIOL Q41364 2-OXOGLUTARATE/MALATE TRANSLOCATOR PRECURSOR. ;, mRNA sequence.
ePt_572875	YES	1.43836e-09	73.4211	GT973719	GJCCJC2051F11.b Jatropha curcas L. developing seeds (mixed stages) Jatropha curcas cDNA clone GJCCJC2051F11 similar to AT5G27730.1 | Symbols: | similar to unknown protein, mRNA sequence.
ePt_599574	YES	1.4223e-09	73.4211	GT969820	GJCCJC2002F07.b Jatropha curcas L. developing seeds (mixed stages) Jatropha curcas cDNA clone GJCCJC2002F07 similar to Retrotransposon protein, putative, mRNA sequence.
ePt_563076	YES	1.42001e-09	73.4211	EG666493	RCRBV60TP Castor bean cDNA library from roots, 1.8 kb Ricinus communis cDNA clone RCRBV60, mRNA sequence.
ePt_568201	YES	1.33742e-09	73.4211	FN731238	FN731238 WZOAQPAC Quercus petraea cDNA clone WZ0AQPAI14YM01FM2, mRNA sequence.
ePt_503621	YES	1.31448e-09	73.4211	CJ772527	CJ772527 Ipomoea nil shoot 8-days old seedling Ipomoea nil cDNA clone jmsf45o18 3', mRNA sequence.
ePt_599740	YES	1.29956e-09	71.6177	EV768310	AGENCOURT_109865669 NIH_MGC_418 Rattus norvegicus cDNA clone IMAGE:9022452 5', mRNA sequence.
ePt_504116	YES	1.24341e-09	71.6177	CU657441	CU657441 Quercus petraea SSH4 Quercus petraea cDNA clone SSH4PL3D07, mRNA sequence.
ePt_642712	YES	1.11506e-09	71.6177	GW872762	Pm_4188 Fruits and flowers of Prunus mume cv. Xiyeqing Prunus mume cDNA, mRNA sequence.
ePt_503669	YES	1.10802e-09	73.4211	CU487266	CU487266 DROUGHTLS_KZ0ACAF Theobroma cacao cDNA clone KZ0ACAF1YB22FM1, mRNA sequence.
ePt_568520	YES	1.05984e-09	73.4211	AM716695	AM716695 Cucumis melo subsp. agrestis pat81 root 46 days after pollination infected with M. cannonballus Cucumis melo subsp. agrestis cDNA, mRNA sequence.
ePt_640315	YES	1.04379e-09	73.4211	GT711998	CA00-XX-LV9-036-A11-BM.F Coffea arabica LV9 Coffea arabica cDNA clone CA00-XX-LV9-036-A11-BM, mRNA sequence.
ePt_563209	YES	9.26791e-10	73.4211	EE068254	C3B00423 Clusters 4 cm (VvC3) Vitis vinifera cDNA clone C3B00423, mRNA sequence.
ePt_568378	YES	8.37323e-10	73.4211	GO945601	CCII1929.b1 CCII Mimulus nasutus SF floral buds (H) Mimulus guttatus var. nasutus cDNA clone CCII1929 5', mRNA sequence.
ePt_643171	YES	8.35029e-10	73.4211	EH706605	CCIS6053.b1_J02.ab1 CCI(LMS) chicory Cichorium intybus cDNA clone CCIS6053, mRNA sequence.
ePt_639316	YES	7.91443e-10	73.4211	AM716695	AM716695 Cucumis melo subsp. agrestis pat81 root 46 days after pollination infected with M. cannonballus Cucumis melo subsp. agrestis cDNA, mRNA sequence.
ePt_638042	YES	7.70796e-10	73.4211	HO858812	vsubiol_008191_96561.1_c8194 vsubiol_000001_96561.1 Dioscorea alata cDNA, mRNA sequence.
ePt_575183	YES	7.54738e-10	73.4211	GO248012	EgTS_3G6 Eucalyptus globulus C14 clone shoot apex under hydric stress Eucalyptus globulus cDNA, mRNA sequence.
ePt_637539	YES	7.44582e-10	75.2244	ES978354	FNYFDA_UP_010_F09_16MAR2004_069 Brassica napus FNYFDA Brassica napus cDNA 5', mRNA sequence.
ePt_503814	YES	7.36054e-10	75.2244	ES978354	FNYFDA_UP_010_F09_16MAR2004_069 Brassica napus FNYFDA Brassica napus cDNA 5', mRNA sequence.
ePt_636491	YES	6.67828e-10	75.2244	EY726853	CS00-C3-703-093-B09-CT.F Sweet orange fruit, development stadium (4 of 6) Citrus sinensis cDNA, mRNA sequence.
ePt_503706	YES	6.66519e-10	73.4211	GH627346	HYS09840 Hybrid poplar cambium cDNA library during tension wood formation Populus simonii x Populus nigra cDNA clone 23_B12.ab1, mRNA sequence.
ePt_504442	YES	6.41237e-10	73.4211	FC289669	CAGN5123.fwd CAGN Nematostella vectensis Nemve mixed stages unfert eggs to primary polyps Nematostella vectensis cDNA clone CAGN5123 5', mRNA sequence.
ePt_599702	YES	5.92972e-10	73.4211	GH623151	PCF0767x184 PAMP-elicited tomato leaf Solanum lycopersicum cDNA 5', mRNA sequence.
ePt_568571	YES	5.74585e-10	73.4211	DW231593	GH_OVFIB_01-01-03R_C01_InvR_22Jan04_011_F Ovules - day of anthesis Gossypium hirsutum cDNA, mRNA sequence.
ePt_565691	YES	5.60795e-10	73.4211	EY720768	CS00-C3-703-014-A09-CT.F Sweet orange fruit, development stadium (4 of 6) Citrus sinensis cDNA, mRNA sequence.
ePt_642371	YES	5.60241e-10	75.2244	EC936839	WIN0513.C21_K19 Cab Sauv flower, leaf and root normalized (WIN05) Vitis vinifera cDNA clone WIN0513_K19 3', mRNA sequence.
ePt_564839	YES	5.11039e-10	75.2244	EC936839	WIN0513.C21_K19 Cab Sauv flower, leaf and root normalized (WIN05) Vitis vinifera cDNA clone WIN0513_K19 3', mRNA sequence.
ePt_575357	YES	5.05635e-10	73.4211	AJ627704	AJ627704 Eucalyptus gunnii differentiating xylem Eucalyptus gunnii cDNA clone RTAB DNA-07C11, mRNA sequence.
ePt_571431	YES	4.81518e-10	75.2244	EH717721	CNML4335.b1_N03.ab1 CNM(LMS) spotted knapweed Centaurea maculosa cDNA clone CNML4335, mRNA sequence.
ePt_564380	YES	4.80862e-10	75.2244	FS352074	FS352074 LjFL3 Lotus japonicus cDNA clone LjFL3-022-DA02.r0 3', mRNA sequence.
ePt_568875	YES	4.80206e-10	75.2244	FS352074	FS352074 LjFL3 Lotus japonicus cDNA clone LjFL3-022-DA02.r0 3', mRNA sequence.
ePt_571456	YES	4.80206e-10	75.2244	FS352074	FS352074 LjFL3 Lotus japonicus cDNA clone LjFL3-022-DA02.r0 3', mRNA sequence.
ePt_600321	YES	4.7955e-10	75.2244	FS352074	FS352074 LjFL3 Lotus japonicus cDNA clone LjFL3-022-DA02.r0 3', mRNA sequence.
ePt_570546	YES	4.55934e-10	75.2244	GE513546	CCFT9010.b1_D21.ab1 CCF(STU) sunflower Helianthus annuus cDNA clone CCFT9010, mRNA sequence.
ePt_563469	YES	4.48176e-10	73.4211	CB343568	CA32EN0005_IVaF_A02 Cabernet Sauvignon Leaf - CA32EN Vitis vinifera cDNA clone CA32EN0005_IVaF_A02 5', mRNA sequence.
ePt_641507	YES	4.45878e-10	73.4211	FG936993	UCRVU09_CCNT14966_g1 Cowpea UCR 707 Mixed Tissue and Conditions cDNA Library UCRVU09-1-2 Vigna unguiculata cDNA clone CCNT14966.g1, mRNA sequence.
ePt_599641	YES	4.39533e-10	75.2244	ES589480	000001480352_J05.ab1 Eucalyptus globulus under low temperature Eucalyptus globulus cDNA, mRNA sequence.
ePt_572017	YES	4.38877e-10	75.2244	CT983789	CT983789 Eucalyptus gunnii differentiating xylem AFOCEL clone 832 Eucalyptus gunnii cDNA, mRNA sequence.
ePt_567637	YES	4.37565e-10	75.2244	GO613481	571 ethophon treated Ophiopogon japonicus ( L. f . ) KerGawl cDNA library Ophiopogon japonicus cDNA 3', mRNA sequence.
ePt_640555	YES	4.32088e-10	73.4211	FG936993	UCRVU09_CCNT14966_g1 Cowpea UCR 707 Mixed Tissue and Conditions cDNA Library UCRVU09-1-2 Vigna unguiculata cDNA clone CCNT14966.g1, mRNA sequence.
ePt_571009	YES	4.06806e-10	73.4211	GE530295	CCHS17096.b1_O02.ab1 CCHS Espina Barnadesia spinosa cDNA clone CCHS17096, mRNA sequence.
ePt_504309	YES	4.02209e-10	73.4211	DY944131	CHPY12034.b1_D09.ab1 CHP(XYZ) plains sunflower Helianthus petiolaris cDNA clone CHPY12034, mRNA sequence.
ePt_568178	YES	4.00267e-10	75.2244	BB911137	BB911137 Trifolium pratense three week-old plant Trifolium pratense cDNA clone RCE10207, mRNA sequence.
ePt_637995	YES	3.97638e-10	75.2244	HS271845	CCXA14180.g1 CCXA Euonymus alatus seed tissues collected from 8/14 to 9/19/2007 normalized Euonymus alatus cDNA clone CCXA14180 3', mRNA sequence.
ePt_568354	YES	3.93694e-10	75.2244	CX171630	C01_69-22_05.ab1 leaf inoculated with Marssonia pathogen of Populus deltoides Populus deltoides cDNA, mRNA sequence.
ePt_504530	YES	3.9238e-10	75.2244	CT985858	CT985858 Eucalyptus gunnii differentiating xylem AFOCEL clone 832 Eucalyptus gunnii cDNA, mRNA sequence.
ePt_563298	YES	3.9238e-10	75.2244	CT985858	CT985858 Eucalyptus gunnii differentiating xylem AFOCEL clone 832 Eucalyptus gunnii cDNA, mRNA sequence.
ePt_640623	YES	3.83178e-10	75.2244	DT008833	VVG060A04_762581 CabSau Cell Culture (CELu0001) Vitis vinifera cDNA clone VVG060A04 5, mRNA sequence.
ePt_505011	YES	3.7792e-10	75.2244	GR515209	ELPLPH1003H07-g1RSP_20010521 Perennial ryegrass 3 wk seedlings, heat-stressed for 8 hrs at 37 deg. library (LPH1) Lolium perenne cDNA 5', mRNA sequence.
ePt_566766	YES	3.76606e-10	75.2244	DV850119	GH_LSL28C06.f GH_LSL Gossypium hirsutum cDNA clone GH_LSL28C06 5', mRNA sequence.
ePt_639599	YES	3.75948e-10	75.2244	GR515209	ELPLPH1003H07-g1RSP_20010521 Perennial ryegrass 3 wk seedlings, heat-stressed for 8 hrs at 37 deg. library (LPH1) Lolium perenne cDNA 5', mRNA sequence.
ePt_565486	YES	3.70033e-10	75.2244	DY676124	STRBR65JX cold-stressed Fragaria vesca seedlings cDNA library Fragaria vesca cDNA clone STRBR65, mRNA sequence.
ePt_569944	YES	3.5163e-10	75.2244	DV448658	CV01025A2F11.f1 CV01-normalized library Manihot esculenta cDNA clone CV01025A2F11.f1, mRNA sequence.
ePt_566373	YES	3.49001e-10	75.2244	BQ797532	EST 6470 Ripening Grape berries Lambda Zap II Library Vitis vinifera cDNA clone RT074F05 3', mRNA sequence.
ePt_504927	YES	3.33884e-10	75.2244	ES591387	000001601852_K11.ab1 Eucalyptus globulus under low temperature Eucalyptus globulus cDNA, mRNA sequence.
ePt_565621	YES	3.16138e-10	75.2244	HS266403	CCXA11154.g1 CCXA Euonymus alatus seed tissues collected from 8/14 to 9/19/2007 normalized Euonymus alatus cDNA clone CCXA11154 3', mRNA sequence.
ePt_570390	YES	3.1316e-10	73.4211	BM358122	GA__Ea0005G22r Gossypium arboreum 7-10 dpa fiber library Gossypium arboreum cDNA clone GA__Ea0005G22r, mRNA sequence.
ePt_567348	YES	3.12852e-10	75.2244	FC864976	PPN023H05-T7 PPN Prunus persica cDNA clone PPN023H05, mRNA sequence.
ePt_638739	YES	3.12852e-10	75.2244	FC864976	PPN023H05-T7 PPN Prunus persica cDNA clone PPN023H05, mRNA sequence.
ePt_503596	YES	2.98393e-10	75.2244	CT981746	CT981746 Eucalyptus gunnii differentiating xylem AFOCEL clone 832 Eucalyptus gunnii cDNA, mRNA sequence.
ePt_637189	YES	2.95764e-10	75.2244	DB922103	DB922103 full-length enriched cassava cDNA library Manihot esculenta cDNA clone CAS01_006_L24 5', mRNA sequence.
ePt_505048	YES	2.9182e-10	75.2244	GT011713	TransId-245568 CACAT36FR31 Coffea arabica cDNA clone CACAT36FR31-CAFS040TVB similar to Hypothetical protein - Hordeum vulgare var. distichum (Two-rowed barley), mRNA sequence.
ePt_567820	YES	2.85248e-10	75.2244	DB922103	DB922103 full-length enriched cassava cDNA library Manihot esculenta cDNA clone CAS01_006_L24 5', mRNA sequence.
ePt_568266	YES	2.85248e-10	75.2244	DB922103	DB922103 full-length enriched cassava cDNA library Manihot esculenta cDNA clone CAS01_006_L24 5', mRNA sequence.
ePt_568436	YES	2.81961e-10	75.2244	ES595866	000001603752_D03.ab1 Eucalyptus globulus under low temperature Eucalyptus globulus cDNA, mRNA sequence.
ePt_574205	YES	2.73417e-10	75.2244	EY888014	TS27-C2-300-010-B03-CT.F Sunki mandarin bark, greenhouse plant Citrus sunki cDNA, mRNA sequence.
ePt_574893	YES	2.64215e-10	75.2244	GR376794	CCBH5656.b1 CCBH Cryphonectria parasitica pool of mycelia - H Cryphonectria parasitica cDNA clone CCBH5656 5', mRNA sequence.
ePt_566165	YES	2.583e-10	75.2244	HO801403	vsu-ars_026436_LI15contig_10558 VSU-ARS-L15 Phaseolus acutifolius cDNA, mRNA sequence.
ePt_503061	YES	2.57896e-10	73.4211	CK752307	eca01-10cs4-g11 Eca01 Eschscholzia californica cDNA clone eca01-10cs4-g11 5', mRNA sequence.
ePt_569311	YES	2.57643e-10	75.2244	AM826120	AM826120 DL, diurnal library Nicotiana tabacum cDNA clone nt005171053, mRNA sequence.
ePt_568382	YES	2.43183e-10	75.2244	HS271845	CCXA14180.g1 CCXA Euonymus alatus seed tissues collected from 8/14 to 9/19/2007 normalized Euonymus alatus cDNA clone CCXA14180 3', mRNA sequence.
ePt_575122	YES	2.41212e-10	75.2244	CU395096	CU395096 LG0ABA Eucalyptus gunnii cDNA, mRNA sequence.
ePt_638863	YES	2.25438e-10	75.2244	GE632304	LINN_XX_112_I09_LINN112.CR_I09 R. communis developing seed Ricinus communis cDNA, mRNA sequence.
ePt_638267	YES	2.2018e-10	75.2244	GO550560	Mdfrt3034A07_e8467.g1 Mdfrt Malus x domestica cDNA 5' similar to ref|NP_194332.1| hypothetical protein [Arabidopsis thaliana] pir|T04257 hypothetical protein F20B18.130 - Arabidopsis thaliana emb|CAB39667.1| hypothetical protein [Arabidopsis thaliana] emb|CAB79457.1| hypothetical protein [Arabidopsis thaliana], mRNA sequence.
ePt_574914	YES	2.13607e-10	75.2244	FP052336	FP052336 LG0AAD Quercus robur cDNA clone LG0AAD7YD10RM1, mRNA sequence.
ePt_570931	YES	2.09191e-10	77.0278	FC861525	PPN033B12-T7 PPN Prunus persica cDNA clone PPN033B12, mRNA sequence.
ePt_599625	YES	2.07035e-10	75.2244	EV271019	GLMB231TF JCVI-SOY2 Glycine max cDNA 5', mRNA sequence.
ePt_572570	YES	2.01777e-10	75.2244	CD719025	VVB156G02_409957 An expressed sequence tag database for abiotic stressed leaves of Vitis vinifera var. Chardonnay Vitis vinifera cDNA clone VVB156G02 5, mRNA sequence.
ePt_573976	YES	2.01777e-10	75.2244	CD719025	VVB156G02_409957 An expressed sequence tag database for abiotic stressed leaves of Vitis vinifera var. Chardonnay Vitis vinifera cDNA clone VVB156G02 5, mRNA sequence.
ePt_638220	YES	1.96229e-10	75.2244	FC069606	sT7aVVM025E17075 VVM Vitis vinifera cDNA clone VVM025E17075 5' similar to emb_CAO41461.1 unnamed protein product [Vitis vinifera]. Expect = 2e-112, mRNA sequence.
ePt_503655	YES	1.9557e-10	75.2244	CB010077	EP2102P02 Pisolithus microcarpus cDNA after 21 days contact between symbiotic partners Pisolithus microcarpus/Eucalyptus globulus Pisolithus microcarpus cDNA 5', mRNA sequence.
ePt_574039	YES	1.91619e-10	75.2244	ES588937	000001480252_A12.ab1 Eucalyptus globulus under low temperature Eucalyptus globulus cDNA, mRNA sequence.
ePt_641165	YES	1.91619e-10	75.2244	ES588937	000001480252_A12.ab1 Eucalyptus globulus under low temperature Eucalyptus globulus cDNA, mRNA sequence.
ePt_574883	YES	1.89644e-10	75.2244	CV281590	WS0182.B21_F09 PTxD-IL-N-A-9 Populus trichocarpa x Populus deltoides cDNA clone WS0182_F09 3', mRNA sequence.
ePt_574501	YES	1.88327e-10	75.2244	CN926083	000430AEPA001144HT (AEPA) Pinkie expanding leaf Malus x domestica cDNA clone AEPA001144, mRNA sequence.
ePt_574925	YES	1.84758e-10	77.0278	FC873252	KN0AAI2DG11FM1 AbsDev Citrus clementina cDNA clone KN0AAI2DG11, mRNA sequence.
ePt_600173	YES	1.83059e-10	75.2244	FF393535	MOODO01TF MOO Vigna unguiculata cDNA 5', mRNA sequence.
ePt_562941	YES	1.70548e-10	75.2244	CU624704	CU624704 LEAVES_KZ0ABE Theobroma cacao cDNA clone KZ0ABE1YO05RM1, mRNA sequence.
ePt_641704	YES	1.70473e-10	77.0278	FS474096	FS474096 full-length enriched Striga hermonthica cDNA library Striga hermonthica cDNA clone SHAA-aah72c03 3', mRNA sequence.
ePt_640944	YES	1.66338e-10	77.0278	EE455874	BNBS4DCT_UP_033_H06_26MAR2005_034 Brassica napus seeds BNBS4DCT Brassica napus cDNA 5', mRNA sequence.
ePt_641747	YES	1.6528e-10	75.2244	FL714354	CCGB2162.b1 CCGB Panicum virgatum apex + stem (L) Panicum virgatum cDNA clone CCGB2162 5', mRNA sequence.
ePt_565980	YES	1.4355e-10	75.2244	CU629856	CU629856 COTYLEI_KZ0ABB Theobroma cacao cDNA clone KZ0ABB2YE11FM1, mRNA sequence.
ePt_570278	YES	1.37769e-10	77.0278	CU402487	CU402487 LG0ABA Eucalyptus gunnii cDNA, mRNA sequence.
ePt_570701	YES	1.37769e-10	77.0278	CU402487	CU402487 LG0ABA Eucalyptus gunnii cDNA, mRNA sequence.
ePt_503739	YES	1.29875e-10	77.0278	CT983095	CT983095 Eucalyptus gunnii differentiating xylem AFOCEL clone 832 Eucalyptus gunnii cDNA, mRNA sequence.
ePt_640845	YES	1.27996e-10	77.0278	BM412491	EST586818 tomato breaker fruit Solanum lycopersicum cDNA clone cLEG60A12 5' end, mRNA sequence.
ePt_640719	YES	1.27808e-10	77.0278	FR622682	FR622682 WZOAFSAA Fagus sylvatica cDNA clone WZ0AFSAA49YL16FM1, mRNA sequence.
ePt_571292	YES	1.27244e-10	77.0278	AW720336	LjNEST21b3r Lotus japonicus nodule library 5 and 7 week-old Lotus japonicus cDNA 5', mRNA sequence.
ePt_504099	YES	1.2574e-10	77.0278	CK651033	m.03.M11.5 MPer183 cassava lambda zap Manihot esculenta cDNA 5', mRNA sequence.
ePt_564343	YES	1.24989e-10	77.0278	FD756773	Afi04_156_E02_C014.g1 Aristolochia fimbriata flower bud library Aristolochia fimbriata cDNA clone 122I9v_J03 5', mRNA sequence.
ePt_504484	YES	1.22964e-10	77.0278	ES594065	000001602852_I03.ab1 Eucalyptus globulus under low temperature Eucalyptus globulus cDNA, mRNA sequence.
ePt_642118	YES	1.22211e-10	77.0278	ES594065	000001602852_I03.ab1 Eucalyptus globulus under low temperature Eucalyptus globulus cDNA, mRNA sequence.
ePt_642207	YES	1.17126e-10	77.0278	CD668855	eec1c.pk007.j6 eec1c Eucalyptus tereticornis cDNA clone eec1c.pk007.j6 5' end, mRNA sequence.
ePt_503464	YES	1.1675e-10	77.0278	EG666493	RCRBV60TP Castor bean cDNA library from roots, 1.8 kb Ricinus communis cDNA clone RCRBV60, mRNA sequence.
ePt_640460	YES	1.16561e-10	77.0278	EG666493	RCRBV60TP Castor bean cDNA library from roots, 1.8 kb Ricinus communis cDNA clone RCRBV60, mRNA sequence.
ePt_572356	YES	1.13737e-10	77.0278	EG666493	RCRBV60TP Castor bean cDNA library from roots, 1.8 kb Ricinus communis cDNA clone RCRBV60, mRNA sequence.
ePt_570692	YES	1.11101e-10	77.0278	GR140650	CCBX20692.g1 CCBX Mimulus guttatus IM62 floral buds (N) Mimulus guttatus cDNA clone CCBX20692 3', mRNA sequence.
ePt_640780	YES	1.08276e-10	77.0278	CU399187	CU399187 LG0ABA Eucalyptus gunnii cDNA, mRNA sequence.
ePt_504427	YES	1.08088e-10	77.0278	CU399187	CU399187 LG0ABA Eucalyptus gunnii cDNA, mRNA sequence.
ePt_504535	YES	1.07523e-10	77.0278	CU399187	CU399187 LG0ABA Eucalyptus gunnii cDNA, mRNA sequence.
ePt_643185	YES	1.04886e-10	77.0278	FL918956	CCGO12100.g1 CCGO Panicum virgatum root (H) Panicum virgatum cDNA clone CCGO12100 3', mRNA sequence.
ePt_643513	YES	1.04886e-10	77.0278	FL918956	CCGO12100.g1 CCGO Panicum virgatum root (H) Panicum virgatum cDNA clone CCGO12100 3', mRNA sequence.
ePt_572492	YES	1.0225e-10	77.0278	EH734551	CNMM7624.b1_P10.ab1 CNM(LMS) spotted knapweed Centaurea maculosa cDNA clone CNMM7624, mRNA sequence.
ePt_504140	YES	1.01309e-10	77.0278	GW829876	FES018K23_3071 Ficus elastica stem cDNA library (FES) Ficus elastica cDNA clone FES018K23, mRNA sequence.
ePt_571510	YES	9.67893e-11	77.0278	EL351840	CCEL8465.b1_A05.ab1 CCE(LMS) endive Cichorium endivia cDNA clone CCEL8465, mRNA sequence.
ePt_642723	YES	9.67893e-11	77.0278	EL351840	CCEL8465.b1_A05.ab1 CCE(LMS) endive Cichorium endivia cDNA clone CCEL8465, mRNA sequence.
ePt_570597	YES	9.37764e-11	77.0278	EL351840	CCEL8465.b1_A05.ab1 CCE(LMS) endive Cichorium endivia cDNA clone CCEL8465, mRNA sequence.
ePt_567286	YES	9.11401e-11	77.0278	EV206442	0175149 Brassica napus Leaf - drought Brassica napus cDNA, mRNA sequence.
ePt_504580	YES	8.9257e-11	77.0278	CU639538	CU639538 Quercus robur SSH1 Quercus robur cDNA clone SSH1GFPL1G04, mRNA sequence.
ePt_504355	YES	7.90885e-11	77.0278	BI097321	SCUM08-DS5-1 Melaleuca alternifolia (Cheel) mRNA Melaleuca alternifolia cDNA, mRNA sequence.
ePt_641509	YES	7.62639e-11	77.0278	CK853569	14405 Stolon Solanum tuberosum cDNA, mRNA sequence.
ePt_569622	YES	7.40043e-11	77.0278	FN716807	FN716807 WZOAQRAQ Quercus robur cDNA clone WZ0AQRAQ3YF07FM1, mRNA sequence.
ePt_639604	YES	6.77902e-11	77.0278	DW231161	GH_OVfbl_01-01-21R_G03_InvR_11Feb04_019_R Ovules - day of anthesis from a fiberless mutant Gossypium hirsutum cDNA, mRNA sequence.
ePt_599337	YES	6.44006e-11	77.0278	ES594065	000001602852_I03.ab1 Eucalyptus globulus under low temperature Eucalyptus globulus cDNA, mRNA sequence.
ePt_643196	YES	6.42123e-11	77.0278	ES594065	000001602852_I03.ab1 Eucalyptus globulus under low temperature Eucalyptus globulus cDNA, mRNA sequence.
ePt_641826	YES	6.13877e-11	77.0278	ES591387	000001601852_K11.ab1 Eucalyptus globulus under low temperature Eucalyptus globulus cDNA, mRNA sequence.
ePt_568938	YES	6.02579e-11	77.0278	EX168145	E01_R15_003 Cotton 1-14 day post anthesis Lambda Zap Express Library Gossypium hirsutum cDNA, mRNA sequence.
ePt_575592	YES	5.93164e-11	77.0278	EY763256	CR05-C1-100-065-B05-CT.F Mandarin leaf, greenhouse plant Citrus reticulata cDNA, mRNA sequence.
ePt_572555	YES	5.76216e-11	77.0278	DW240974	GH_TS_1-03-02_B11_LibSeq2_26Nov03_093 Stem - 3-5 weeks after planting Gossypium hirsutum cDNA, mRNA sequence.
ePt_566841	YES	5.7245e-11	77.0278	DW240974	GH_TS_1-03-02_B11_LibSeq2_26Nov03_093 Stem - 3-5 weeks after planting Gossypium hirsutum cDNA, mRNA sequence.
ePt_505128	YES	5.52772e-11	77.0278	DC603283	DC603283 Castanopsis sieboldii inner bark cDNA library Castanopsis sieboldii cDNA clone Cc_TUM05_11F09 5', mRNA sequence.
ePt_504024	YES	5.24473e-11	77.0278	CK071715	69516rsicem_14836.y1 Oryza sativa cv. PA64s panicle ferile cDNA library Oryza sativa Indica Group cDNA 5', mRNA sequence.
ePt_599304	YES	4.84854e-11	77.0278	CT980416	CT980416 Eucalyptus gunnii differentiating xylem AFOCEL clone 832 Eucalyptus gunnii cDNA, mRNA sequence.
ePt_574248	YES	4.70643e-11	78.8312	CU398812	CU398812 LG0ABA Eucalyptus gunnii cDNA, mRNA sequence.
ePt_565708	YES	4.5772e-11	78.8312	CN579217	Mdfw2032j16.y1 Mdfw Malus x domestica cDNA clone Mdfw2032j16 5' similar to TR:O82604 O82604 T2L5.6 PROTEIN. ;, mRNA sequence.
ePt_574152	YES	4.42642e-11	78.8312	CU398812	CU398812 LG0ABA Eucalyptus gunnii cDNA, mRNA sequence.
ePt_564654	YES	4.13164e-11	77.0278	DN907207	22141.3 Developing Tubers Solanum tuberosum cDNA clone 22141 3', mRNA sequence.
ePt_640149	YES	4.08717e-11	78.8312	CU399973	CU399973 LG0ABA Eucalyptus gunnii cDNA, mRNA sequence.
ePt_575741	YES	3.95254e-11	78.8312	EH717721	CNML4335.b1_N03.ab1 CNM(LMS) spotted knapweed Centaurea maculosa cDNA clone CNML4335, mRNA sequence.
ePt_599667	YES	3.88792e-11	78.8312	FN012143	FN012143 Petunia axillaris subsp. axillaris pool of root and petal tissue Petunia axillaris subsp. axillaris cDNA clone dr004P0015N03_F.ab1 2007-08-10, mRNA sequence.
ePt_571274	YES	3.87715e-11	78.8312	CO498734	G.h.fbr-sw08124 G.h.fbr-sw Gossypium hirsutum cDNA, mRNA sequence.
ePt_567238	YES	3.87177e-11	78.8312	CT982071	CT982071 Eucalyptus gunnii differentiating xylem AFOCEL clone 832 Eucalyptus gunnii cDNA, mRNA sequence.
ePt_642470	YES	3.85023e-11	78.8312	CV301309	MM5_G07 Young roots probed with 3 and 7 week old root enriched transcripts Beta vulgaris cDNA, mRNA sequence.
ePt_566522	YES	3.73545e-11	77.0278	EC924300	WIN024.C21_O23 Cab Sauv flower, leaf and root non-normalized (WIN02) Vitis vinifera cDNA clone WIN024_O23 3', mRNA sequence.
ePt_503716	YES	3.64022e-11	78.8312	CO088245	GR__Ea07B21.f GR__Ea Gossypium raimondii cDNA clone GR__Ea07B21 5', mRNA sequence.
ePt_637610	YES	3.58098e-11	78.8312	EY844608	CA26-C1-002-036-H01-CT.F Sour orange leaf, field plant Citrus aurantium cDNA, mRNA sequence.
ePt_504092	YES	3.52297e-11	78.8312	DT513175	WS02421.B21_F08 PTxD-ICC-N-A-14 Populus trichocarpa x Populus deltoides cDNA clone WS02421_F08 3', mRNA sequence.
ePt_637743	YES	3.52297e-11	78.8312	DT513175	WS02421.B21_F08 PTxD-ICC-N-A-14 Populus trichocarpa x Populus deltoides cDNA clone WS02421_F08 3', mRNA sequence.
ePt_503982	YES	3.47442e-11	78.8312	GW947360	Dur25.seed.ADAA-aaa98h10.b1 DUR25-seed Arachis duranensis cDNA 5', mRNA sequence.
ePt_640660	YES	3.45823e-11	78.8312	HO856945	vsubiol_006324_96561.1_c6326 vsubiol_000001_96561.1 Dioscorea alata cDNA, mRNA sequence.
ePt_639286	YES	3.42586e-11	78.8312	DT513175	WS02421.B21_F08 PTxD-ICC-N-A-14 Populus trichocarpa x Populus deltoides cDNA clone WS02421_F08 3', mRNA sequence.
ePt_638457	YES	3.1669e-11	78.8312	FN012143	FN012143 Petunia axillaris subsp. axillaris pool of root and petal tissue Petunia axillaris subsp. axillaris cDNA clone dr004P0015N03_F.ab1 2007-08-10, mRNA sequence.
ePt_572718	YES	3.10755e-11	78.8312	DY833357	CTOY9281.b1_A17.ab1 CTO(XYZ) dandelion Taraxacum officinale cDNA clone CTOY9281, mRNA sequence.
ePt_642415	YES	3.10755e-11	78.8312	HO861587	vsubiol_010966_96561.1_c10973 vsubiol_000001_96561.1 Dioscorea alata cDNA, mRNA sequence.
ePt_504671	YES	3.08597e-11	78.8312	GR515209	ELPLPH1003H07-g1RSP_20010521 Perennial ryegrass 3 wk seedlings, heat-stressed for 8 hrs at 37 deg. library (LPH1) Lolium perenne cDNA 5', mRNA sequence.
ePt_568497	YES	3.08597e-11	78.8312	GR515209	ELPLPH1003H07-g1RSP_20010521 Perennial ryegrass 3 wk seedlings, heat-stressed for 8 hrs at 37 deg. library (LPH1) Lolium perenne cDNA 5', mRNA sequence.
ePt_503174	YES	2.94031e-11	78.8312	EY844608	CA26-C1-002-036-H01-CT.F Sour orange leaf, field plant Citrus aurantium cDNA, mRNA sequence.
ePt_572204	YES	2.94031e-11	78.8312	GE635079	LINN_XX_014_B15_LINN14.CR_B15 R. communis developing seed Ricinus communis cDNA, mRNA sequence.
ePt_566554	YES	2.75148e-11	78.8312	HO809013	vsu-ars_034046_LI15contig_12102 VSU-ARS-L15 Phaseolus acutifolius cDNA, mRNA sequence.
ePt_504203	YES	2.73556e-11	77.0278	GD857296	454GmaGlobSeed599945 Soybean Seeds Containing Globular-Stage Embryos Glycine max cDNA, mRNA sequence.
ePt_504242	YES	2.70832e-11	78.8312	BI097300	SCUM04-DS1-1 Melaleuca alternifolia (Cheel) mRNA Melaleuca alternifolia cDNA, mRNA sequence.
ePt_644337	YES	2.70832e-11	78.8312	HO856945	vsubiol_006324_96561.1_c6326 vsubiol_000001_96561.1 Dioscorea alata cDNA, mRNA sequence.
ePt_504127	YES	2.62739e-11	78.8312	EE487923	SD2MrF8 YG/PR Prunus cerasus cDNA, mRNA sequence.
ePt_570845	YES	2.56805e-11	78.8312	FC864976	PPN023H05-T7 PPN Prunus persica cDNA clone PPN023H05, mRNA sequence.
ePt_637656	YES	2.48173e-11	78.8312	FP033888	FP033888 LG0AAB Quercus robur cDNA clone LG0AAB4YC04RM1 similar to PplGI.3|TC83616 similar to UP|O04794_9ROSI Acyl-ACP thioesterase, mRNA sequence.
ePt_639763	YES	2.44396e-11	78.8312	DB922103	DB922103 full-length enriched cassava cDNA library Manihot esculenta cDNA clone CAS01_006_L24 5', mRNA sequence.
ePt_504151	YES	2.43857e-11	78.8312	GW930035	Dur25.root.ADAA-aae77a07.b1 DUR25-root Arachis duranensis cDNA 5', mRNA sequence.
ePt_570269	YES	2.43857e-11	78.8312	CU398904	CU398904 LG0ABA Eucalyptus gunnii cDNA, mRNA sequence.
ePt_565601	YES	2.43317e-11	78.8312	DB922103	DB922103 full-length enriched cassava cDNA library Manihot esculenta cDNA clone CAS01_006_L24 5', mRNA sequence.
ePt_638531	YES	2.39001e-11	78.8312	GT011713	TransId-245568 CACAT36FR31 Coffea arabica cDNA clone CACAT36FR31-CAFS040TVB similar to Hypothetical protein - Hordeum vulgare var. distichum (Two-rowed barley), mRNA sequence.
ePt_503683	YES	2.22816e-11	78.8312	CV084371	Mddb5027n20.y1 Mddb Malus x domestica cDNA clone Mddb5027n20 5' similar to TR:O49665 O49665 PREDICTED PROTEIN. ;, mRNA sequence.
ePt_599616	YES	2.06737e-11	80.6345	CT983795	CT983795 Eucalyptus gunnii differentiating xylem AFOCEL clone 832 Eucalyptus gunnii cDNA, mRNA sequence.
ePt_600610	YES	2.05012e-11	78.8312	FG194527	AGN_PNL221dr1_h2.trimmed.seq AGN_PNL Nicotiana tabacum cDNA 3', mRNA sequence.
ePt_564292	YES	2.02315e-11	78.8312	FD416886	LB00006R_T3_006_A06_15JUN2004_048_ab1 CrUniGene leaf Catharanthus roseus cDNA similar to Polyadenylation factor I complex subunit FIP1, mRNA sequence.
ePt_643987	YES	2.02315e-11	78.8312	FD416886	LB00006R_T3_006_A06_15JUN2004_048_ab1 CrUniGene leaf Catharanthus roseus cDNA similar to Polyadenylation factor I complex subunit FIP1, mRNA sequence.
ePt_566455	YES	2.00157e-11	78.8312	FG194527	AGN_PNL221dr1_h2.trimmed.seq AGN_PNL Nicotiana tabacum cDNA 3', mRNA sequence.
ePt_643122	YES	1.9638e-11	78.8312	FG486310	021104KAUB001267HT (KAUB) Actinidia chinensis CK51-05 petal Actinidia chinensis cDNA clone KAUBB00126, mRNA sequence.
ePt_568413	YES	1.95301e-11	78.8312	FP042527	FP042527 LG0AAC Quercus petraea cDNA clone LG0AAC6YE21RM1 similar to LAC14_ARATH Laccase-14 precursor . - Arabidopsis thaliana, mRNA sequence.
ePt_573754	YES	1.95301e-11	78.8312	FP042527	FP042527 LG0AAC Quercus petraea cDNA clone LG0AAC6YE21RM1 similar to LAC14_ARATH Laccase-14 precursor . - Arabidopsis thaliana, mRNA sequence.
ePt_566267	YES	1.88287e-11	78.8312	ES592218	000001602252_D22.ab1 Eucalyptus globulus under low temperature Eucalyptus globulus cDNA, mRNA sequence.
ePt_567445	YES	1.78576e-11	78.8312	FN743145	FN743145 WZOAQPAG Quercus petraea cDNA clone WZ0AQPAG13YC10CM1, mRNA sequence.
ePt_639146	YES	1.77497e-11	78.8312	FG486310	021104KAUB001267HT (KAUB) Actinidia chinensis CK51-05 petal Actinidia chinensis cDNA clone KAUBB00126, mRNA sequence.
ePt_574558	YES	1.75339e-11	78.8312	ES592218	000001602252_D22.ab1 Eucalyptus globulus under low temperature Eucalyptus globulus cDNA, mRNA sequence.
ePt_573641	YES	1.71563e-11	78.8312	GW870352	Pm_1778 Fruits and flowers of Prunus mume cv. Xiyeqing Prunus mume cDNA, mRNA sequence.
ePt_562930	YES	1.67786e-11	78.8312	BJ569444	BJ569444 Ipomoea nil mixture of flower and flower bud Ipomoea nil cDNA clone jm5j22 3', mRNA sequence.
ePt_565741	YES	1.67786e-11	78.8312	GT315531	iag04-6-i14.ab1 Iag04 Ipomopsis aggregata cDNA clone iag04-6-i14.ab1, mRNA sequence.
ePt_567565	YES	1.61074e-11	78.8312	EC956692	WIN0574.C21_I01 Cab Sauv flower, leaf and root normalized (WIN05) Vitis vinifera cDNA clone WIN0574_I01 3', mRNA sequence.
ePt_641288	YES	1.57831e-11	78.8312	FG486310	021104KAUB001267HT (KAUB) Actinidia chinensis CK51-05 petal Actinidia chinensis cDNA clone KAUBB00126, mRNA sequence.
ePt_571041	YES	1.57291e-11	78.8312	CN926083	000430AEPA001144HT (AEPA) Pinkie expanding leaf Malus x domestica cDNA clone AEPA001144, mRNA sequence.
ePt_567610	YES	1.50578e-11	80.6345	FE690086	Pv013A_M13F_A06.ab1 Phaseolus vulgaris cv Early gallatin Phaseolus vulgaris cDNA, mRNA sequence.
ePt_503981	YES	1.34589e-11	78.8312	HO778841	vsu-ars_003874_LI10Contig_7492 VSU-ARS-L10 Phaseolus acutifolius cDNA, mRNA sequence.
ePt_639625	YES	1.22962e-11	80.6345	HO858773	vsubiol_008152_96561.1_c8155 vsubiol_000001_96561.1 Dioscorea alata cDNA, mRNA sequence.
ePt_639661	YES	1.22345e-11	80.6345	DV449348	CV01027B1E08.f1 CV01-normalized library Manihot esculenta cDNA clone CV01027B1E08.f1, mRNA sequence.
ePt_564055	YES	1.19413e-11	80.6345	AJ827743	AJ827743 S3 Prunus persica cDNA clone S315O15, mRNA sequence.
ePt_599612	YES	1.18373e-11	78.8312	DN907207	22141.3 Developing Tubers Solanum tuberosum cDNA clone 22141 3', mRNA sequence.
ePt_643026	YES	1.14322e-11	80.6345	AJ827743	AJ827743 S3 Prunus persica cDNA clone S315O15, mRNA sequence.
ePt_639802	YES	1.02597e-11	80.6345	GT044616	CLS_cLiFproots_56a1_1_e01cLibkit5LD_C01 CLS_cLiFproots_plant Festuca arundinacea cDNA clone 56e01 5', mRNA sequence.
ePt_570784	YES	1.02443e-11	80.6345	EG397113	BG01036B2F05.f1 BG01 - normalized library Leymus cinereus x Leymus triticoides cDNA clone BG01036B2F05.f1, mRNA sequence.
ePt_562899	YES	1.01862e-11	80.6345	EG397113	BG01036B2F05.f1 BG01 - normalized library Leymus cinereus x Leymus triticoides cDNA clone BG01036B2F05.f1, mRNA sequence.
ePt_567628	YES	1.01671e-11	80.6345	EG397113	BG01036B2F05.f1 BG01 - normalized library Leymus cinereus x Leymus triticoides cDNA clone BG01036B2F05.f1, mRNA sequence.
ePt_504120	YES	1.01399e-11	80.6345	EY765026	CR05-C1-100-085-A04-CT.F Mandarin leaf, greenhouse plant Citrus reticulata cDNA, mRNA sequence.
ePt_644154	YES	1.01399e-11	80.6345	EY765026	CR05-C1-100-085-A04-CT.F Mandarin leaf, greenhouse plant Citrus reticulata cDNA, mRNA sequence.
ePt_567923	YES	1.01089e-11	80.6345	GT689118	CA00-XX-CA1-008-F11-BG.F Coffea arabica CA1 Coffea arabica cDNA clone CA00-XX-CA1-008-F11-BG, mRNA sequence.
ePt_503895	YES	9.89254e-12	80.6345	CT981954	CT981954 Eucalyptus gunnii differentiating xylem AFOCEL clone 832 Eucalyptus gunnii cDNA, mRNA sequence.
ePt_504678	YES	9.87708e-12	80.6345	GT689118	CA00-XX-CA1-008-F11-BG.F Coffea arabica CA1 Coffea arabica cDNA clone CA00-XX-CA1-008-F11-BG, mRNA sequence.
ePt_562957	YES	9.59886e-12	80.6345	FC325318	P00461_C6-B8_M13-F_E12_088.ab1 Onu-Ua-pathc Ulmus americana cDNA, mRNA sequence.
ePt_641586	YES	9.45906e-12	78.8312	EH738471	CNMS11922.b1_C05.ab1 CNM(LMS) spotted knapweed Centaurea maculosa cDNA clone CNMS11922, mRNA sequence.
ePt_638055	YES	9.367e-12	80.6345	GE543757	CCHS30024.b1_O17.ab1 CCHS Espina Barnadesia spinosa cDNA clone CCHS30024, mRNA sequence.
ePt_639199	YES	9.32063e-12	80.6345	EG666493	RCRBV60TP Castor bean cDNA library from roots, 1.8 kb Ricinus communis cDNA clone RCRBV60, mRNA sequence.
ePt_640931	YES	9.2588e-12	80.6345	CU550133	CU550133 EPIC23I_KZ0AAS Theobroma cacao cDNA clone KZ0AAS9YK08FM1, mRNA sequence.
ePt_566492	YES	9.19697e-12	80.6345	EG397113	BG01036B2F05.f1 BG01 - normalized library Leymus cinereus x Leymus triticoides cDNA clone BG01036B2F05.f1, mRNA sequence.
ePt_573996	YES	8.9342e-12	80.6345	FR600870	FR600870 WZOAFSCA Fagus sylvatica cDNA clone WZ0AFSCA20YA18NM1, mRNA sequence.
ePt_575718	YES	8.74872e-12	80.6345	DC603283	DC603283 Castanopsis sieboldii inner bark cDNA library Castanopsis sieboldii cDNA clone Cc_TUM05_11F09 5', mRNA sequence.
ePt_570754	YES	8.42412e-12	80.6345	EY170239	CBTI2598.b1_L02.ab1:P Triphysaria pusilla root tip normalized cDNA library Triphysaria pusilla cDNA, mRNA sequence.
ePt_574454	YES	8.40866e-12	80.6345	GR171722	CBPG2556.g1 CBPG Mimulus guttatus IM62 roots, seedlings, fruits, callus (L) Mimulus guttatus cDNA clone CBPG2556 3', mRNA sequence.
ePt_574937	YES	8.40866e-12	80.6345	EY170239	CBTI2598.b1_L02.ab1:P Triphysaria pusilla root tip normalized cDNA library Triphysaria pusilla cDNA, mRNA sequence.
ePt_643108	YES	8.22318e-12	80.6345	GE651807	EST2134 Tender roots cDNA library of tea plant Camellia sinensis cDNA clone 07102311-CHAG_22_72.M13+_H09.ab1, mRNA sequence.
ePt_568104	YES	8.03769e-12	80.6345	EY170239	CBTI2598.b1_L02.ab1:P Triphysaria pusilla root tip normalized cDNA library Triphysaria pusilla cDNA, mRNA sequence.
ePt_504059	YES	7.92949e-12	80.6345	FG896698	UCRVU08_CCNS14507_g1 Cowpea IT97K-461-4 Mixed Tissue and Conditions cDNA Library UCRVU08-1-2 Vigna unguiculata cDNA clone CCNS14507.g1, mRNA sequence.
ePt_503457	YES	7.75946e-12	80.6345	DB922230	DB922230 full-length enriched cassava cDNA library Manihot esculenta cDNA clone CAS01_007_B08 5', mRNA sequence.
ePt_564482	YES	7.75946e-12	80.6345	DB922230	DB922230 full-length enriched cassava cDNA library Manihot esculenta cDNA clone CAS01_007_B08 5', mRNA sequence.
ePt_562806	YES	7.63581e-12	80.6345	CD668584	eec1c.pk004.c4 eec1c Eucalyptus tereticornis cDNA clone eec1c.pk004.c4 5' end, mRNA sequence.
ePt_566700	YES	7.45032e-12	80.6345	FM888046	FM888046 Jatropha curcas embryo 35-55 (DAF) Jatropha curcas cDNA clone rjcfea0_001361, mRNA sequence.
ePt_566724	YES	7.45032e-12	80.6345	FM888046	FM888046 Jatropha curcas embryo 35-55 (DAF) Jatropha curcas cDNA clone rjcfea0_001361, mRNA sequence.
ePt_567122	YES	7.45032e-12	80.6345	FM888046	FM888046 Jatropha curcas embryo 35-55 (DAF) Jatropha curcas cDNA clone rjcfea0_001361, mRNA sequence.
ePt_503238	YES	7.20301e-12	80.6345	DT511838	WS02417.B21_J09 PTxD-ICC-N-A-14 Populus trichocarpa x Populus deltoides cDNA clone WS02417_J09 3', mRNA sequence.
ePt_599708	YES	7.20301e-12	80.6345	FP026037	FP026037 LG0AAA Quercus robur cDNA clone LG0AAA6YB09RM1 similar to A2Q4B8_MEDTR CMP/dCMP deaminase, zinc-binding. - Medicago truncatula, mRNA sequence.
ePt_599344	YES	6.72384e-12	80.6345	CD668855	eec1c.pk007.j6 eec1c Eucalyptus tereticornis cDNA clone eec1c.pk007.j6 5' end, mRNA sequence.
ePt_599676	YES	6.70838e-12	80.6345	CD668855	eec1c.pk007.j6 eec1c Eucalyptus tereticornis cDNA clone eec1c.pk007.j6 5' end, mRNA sequence.
ePt_567916	YES	6.67747e-12	80.6345	EY652086	CS00-C1-100-029-D05-CT.F Sweet orange leaf, greenhouse plant Citrus sinensis cDNA, mRNA sequence.
ePt_570591	YES	6.58472e-12	80.6345	FD496032	Ltu01b_146_F02_C012.g1 Liriodendron Flower Bud Library Liriodendron tulipifera cDNA clone 122Mkh_K04 5', mRNA sequence.
ePt_641369	YES	6.39924e-12	80.6345	EY652086	CS00-C1-100-029-D05-CT.F Sweet orange leaf, greenhouse plant Citrus sinensis cDNA, mRNA sequence.
ePt_574738	YES	6.27558e-12	80.6345	EY652086	CS00-C1-100-029-D05-CT.F Sweet orange leaf, greenhouse plant Citrus sinensis cDNA, mRNA sequence.
ePt_566269	YES	5.67275e-12	80.6345	FR603563	FR603563 WZOAFSCA Fagus sylvatica cDNA clone WZ0AFSCA26YH14FM1, mRNA sequence.
ePt_565453	YES	5.64184e-12	80.6345	CU396036	CU396036 LG0ABA Eucalyptus gunnii cDNA, mRNA sequence.
ePt_567185	YES	5.64184e-12	80.6345	EX107553	BR093843 whole plant cDNA library KFYP Brassica rapa subsp. pekinensis cDNA clone KFYP-016D12 5', mRNA sequence.
ePt_565438	YES	5.61093e-12	80.6345	DT487053	WS02532.B21_K11 PT-MB-N-A-15 Populus trichocarpa cDNA clone WS02532_K11 3', mRNA sequence.
ePt_573483	YES	5.3327e-12	80.6345	BF585645	FM1_23_H04.b1_A003 Floral-Induced Meristem 1 (FM1) Sorghum propinquum cDNA, mRNA sequence.
ePt_575634	YES	5.3327e-12	80.6345	BF585645	FM1_23_H04.b1_A003 Floral-Induced Meristem 1 (FM1) Sorghum propinquum cDNA, mRNA sequence.
ePt_569513	YES	5.20904e-12	80.6345	DT502608	WS0133.BR_J10 PTxD-IL-FL-A-4 Populus trichocarpa x Populus deltoides cDNA clone WS0133_J10 5', mRNA sequence.
ePt_503556	YES	5.02356e-12	80.6345	EG560103	CR03012D04 Root CR03 cDNA library Catharanthus roseus cDNA clone CR03012D04 5', mRNA sequence.
ePt_504282	YES	5.0081e-12	80.6345	GT979480	JGCCJG2032H03.b Jatropha curcas L. germinating seeds (mixed stages) Jatropha curcas cDNA clone JGCCJG2032H03 similar to cell cycle control protein-related, mRNA sequence.
ePt_642890	YES	4.91971e-12	82.4379	DT030112	VVL042E06_681850 CabSau Berry Postveraison Mixed Stages 36-38 (Brix > 15) under water deficit stress Vitis vinifera cDNA clone VVL042E06 5, mRNA sequence.
ePt_641660	YES	4.83807e-12	80.6345	DT519148	WS02440.B21_G24 PTxD-ICC-N-A-14 Populus trichocarpa x Populus deltoides cDNA clone WS02440_G24 3', mRNA sequence.
ePt_641749	YES	4.82261e-12	80.6345	GE633347	LINN_XX_114_D21_LINN114.CR_D21 R. communis developing seed Ricinus communis cDNA, mRNA sequence.
ePt_504263	YES	4.45999e-12	80.6345	CN926083	000430AEPA001144HT (AEPA) Pinkie expanding leaf Malus x domestica cDNA clone AEPA001144, mRNA sequence.
ePt_599572	YES	4.45999e-12	80.6345	ES591264	000001601852_D24.ab1 Eucalyptus globulus under low temperature Eucalyptus globulus cDNA, mRNA sequence.
ePt_504273	YES	4.19673e-12	80.6345	DB888475	DB888475 full-length enriched poplar cDNA library, mixture of leaf, bud, stem, root Populus nigra cDNA clone PnFL2-077_B23 5', mRNA sequence.
ePt_599918	YES	4.08833e-12	80.6345	CT987747	CT987747 Eucalyptus gunnii differentiating xylem AFOCEL clone 832 Eucalyptus gunnii cDNA, mRNA sequence.
ePt_573127	YES	3.99541e-12	80.6345	FC870699	KN0AAA3DH05ZM1 AbsAOv1 Citrus clementina cDNA clone KN0AAA3DH05, mRNA sequence.
ePt_637070	YES	3.96444e-12	80.6345	CU629856	CU629856 COTYLEI_KZ0ABB Theobroma cacao cDNA clone KZ0ABB2YE11FM1, mRNA sequence.
ePt_574581	YES	3.85604e-12	80.6345	CU629856	CU629856 COTYLEI_KZ0ABB Theobroma cacao cDNA clone KZ0ABB2YE11FM1, mRNA sequence.
ePt_568110	YES	3.76312e-12	80.6345	AM826120	AM826120 DL, diurnal library Nicotiana tabacum cDNA clone nt005171053, mRNA sequence.
ePt_573980	YES	3.24444e-12	82.4379	FR633318	FR633318 WZ0AQRAS Quercus robur cDNA clone WZ0AQRAS39YH13CM1, mRNA sequence.
ePt_638396	YES	3.23659e-12	80.6345	HO801195	vsu-ars_026228_LI15contig_16536 VSU-ARS-L15 Phaseolus acutifolius cDNA, mRNA sequence.
ePt_504624	YES	3.20024e-12	82.4379	FR633318	FR633318 WZ0AQRAS Quercus robur cDNA clone WZ0AQRAS39YH13CM1, mRNA sequence.
ePt_637121	YES	3.17465e-12	80.6345	BE611180	sq76h10.y1 Gm-c1048 Glycine max cDNA clone GENOME SYSTEMS CLONE ID: Gm-c1048-1436 5' similar to TR:O22659 O22659 ADP-GLUCOSE PYROPHOSPHORYLASE LARGE SUBUNIT 2 ;, mRNA sequence.
ePt_565967	YES	3.08974e-12	82.4379	CN495055	Mdfw2028d20.y1 Mdfw Malus x domestica cDNA clone Mdfw2028d20 5' similar to SW:KDSB_ECOLI P04951 3-DEOXY-MANNO-OCTULOSONATE CYTIDYLYLTRANSFERASE ;, mRNA sequence.
ePt_565639	YES	2.88041e-12	80.6345	CU424581	CU424581 Clytia hemisphaerica library Clytia hemisphaerica cDNA clone SA0AAB9YM01 5', mRNA sequence.
ePt_573829	YES	2.86526e-12	82.4379	FN708146	FN708146 WZOAQPAB Quercus petraea cDNA clone WZ0AQPAB9YB17FM1, mRNA sequence.
ePt_640988	YES	2.84755e-12	82.4379	HO799986	vsu-ars_025019_LI15contig_6460 VSU-ARS-L15 Phaseolus acutifolius cDNA, mRNA sequence.
ePt_567203	YES	2.75455e-12	82.4379	EG666493	RCRBV60TP Castor bean cDNA library from roots, 1.8 kb Ricinus communis cDNA clone RCRBV60, mRNA sequence.
ePt_563201	YES	2.73683e-12	82.4379	CD011740	VVB015G10_393087 An expressed sequence tag database for abiotic stressed leaves of Vitis vinifera var. Chardonnay Vitis vinifera cDNA clone VVB015G10 3, mRNA sequence.
ePt_641568	YES	2.69458e-12	80.6345	EX107553	BR093843 whole plant cDNA library KFYP Brassica rapa subsp. pekinensis cDNA clone KFYP-016D12 5', mRNA sequence.
ePt_638874	YES	2.68812e-12	82.4379	DT459188	GH_ON37E15.r GH_ON Gossypium hirsutum cDNA clone GH_ON37E15 3', mRNA sequence.
ePt_641712	YES	2.68369e-12	82.4379	FG123511	4690-97-D05 Oenothera strain hookeri de Vries leaf library Oenothera elata subsp. hookeri cDNA 5' similar to Arabidopsis homolog (blastX): At3g14420; glycolate oxidase like protein, mRNA sequence.
ePt_503707	YES	2.65269e-12	82.4379	GH719951	TNI.004B05F020611 TNI Pisum sativum cDNA clone TNI004B05, mRNA sequence.
ePt_643126	YES	2.60398e-12	82.4379	CD011740	VVB015G10_393087 An expressed sequence tag database for abiotic stressed leaves of Vitis vinifera var. Chardonnay Vitis vinifera cDNA clone VVB015G10 3, mRNA sequence.
ePt_571805	YES	2.50875e-12	80.6345	FD030404	CBCZ3039.b1 CBCZ: cDNA library made from Channel catfish mixed leukocyte culture MLC52-1(IpCGJx13) Ictalurus punctatus cDNA 5' similar to zebrafish RefSeq, XP_001335127.1, PREDICTED: similar to Pfn2l protein isoform 1 [Danio rerio], mRNA sequence.
ePt_575563	YES	2.50875e-12	80.6345	ES591716	000001601952_L19.ab1 Eucalyptus globulus under low temperature Eucalyptus globulus cDNA, mRNA sequence.
ePt_639634	YES	2.32055e-12	82.4379	CD011740	VVB015G10_393087 An expressed sequence tag database for abiotic stressed leaves of Vitis vinifera var. Chardonnay Vitis vinifera cDNA clone VVB015G10 3, mRNA sequence.
ePt_504990	YES	2.10798e-12	82.4379	HS266403	CCXA11154.g1 CCXA Euonymus alatus seed tissues collected from 8/14 to 9/19/2007 normalized Euonymus alatus cDNA clone CCXA11154 3', mRNA sequence.
ePt_504920	YES	2.09912e-12	82.4379	CU404972	CU404972 LG0ABA Eucalyptus gunnii cDNA, mRNA sequence.
ePt_565337	YES	2.06812e-12	82.4379	GT007069	TransId-234249 CAET42MIX Coffea arabica cDNA clone CAET42MIX-CFEWS74TV similar to AT4g15940/dl4011w - Arabidopsis thaliana (Mouse-ear cress), mRNA sequence.
ePt_504487	YES	2.02827e-12	82.4379	CU404972	CU404972 LG0ABA Eucalyptus gunnii cDNA, mRNA sequence.
ePt_575267	YES	2.02827e-12	82.4379	CU404972	CU404972 LG0ABA Eucalyptus gunnii cDNA, mRNA sequence.
ePt_565599	YES	2.00613e-12	82.4379	CU404972	CU404972 LG0ABA Eucalyptus gunnii cDNA, mRNA sequence.
ePt_572286	YES	1.99727e-12	82.4379	DT511838	WS02417.B21_J09 PTxD-ICC-N-A-14 Populus trichocarpa x Populus deltoides cDNA clone WS02417_J09 3', mRNA sequence.
ePt_503445	YES	1.91313e-12	82.4379	EY652275	CS00-C1-100-031-D12-CT.F Sweet orange leaf, greenhouse plant Citrus sinensis cDNA, mRNA sequence.
ePt_637084	YES	1.90427e-12	82.4379	FD536718	RR2EH86JQ RR2(MS) Raphanus raphanistrum subsp. raphanistrum cDNA 3', mRNA sequence.
ePt_571502	YES	1.89984e-12	82.4379	FE521520	li0678551 Radiata pine mature earlywood cDNA library Pinus radiata cDNA clone 42669 E9, mRNA sequence.
ePt_565694	YES	1.85998e-12	82.4379	GT007069	TransId-234249 CAET42MIX Coffea arabica cDNA clone CAET42MIX-CFEWS74TV similar to AT4g15940/dl4011w - Arabidopsis thaliana (Mouse-ear cress), mRNA sequence.
ePt_573003	YES	1.76698e-12	82.4379	FC904116	IC0AAA22BB02RM1 IVIA1 Citrus clementina cDNA clone IC0AAA22BB02, mRNA sequence.
ePt_569485	YES	1.76256e-12	82.4379	CF068395	EST669116 MTUS Medicago truncatula cDNA clone MTUS-7D10, mRNA sequence.
ePt_571007	YES	1.75813e-12	82.4379	CN845627	PG07003B08 Ginseng cDNA library from MeJA treated hairy root Panax ginseng cDNA clone PG07003B08 5', mRNA sequence.
ePt_504322	YES	1.68284e-12	82.4379	EY814499	PT11-C1-900-056-C11-CT.F Poncirus trifoliata leaf, greenhouse plant Citrus trifoliata cDNA, mRNA sequence.
ePt_639040	YES	1.66513e-12	82.4379	CU396036	CU396036 LG0ABA Eucalyptus gunnii cDNA, mRNA sequence.
ePt_640469	YES	1.65627e-12	82.4379	CU540287	CU540287 CORTINS_KZ0AAV Theobroma cacao cDNA clone KZ0AAV14YM11FM1, mRNA sequence.
ePt_641730	YES	1.63413e-12	82.4379	FN750426	FN750426 WZOAQRAP Quercus robur cDNA clone WZ0AQRAP28YJ10FM1, mRNA sequence.
ePt_503418	YES	1.61199e-12	82.4379	GO945601	CCII1929.b1 CCII Mimulus nasutus SF floral buds (H) Mimulus guttatus var. nasutus cDNA clone CCII1929 5', mRNA sequence.
ePt_504297	YES	1.60313e-12	82.4379	FR633343	FR633343 WZ0AQRAS Quercus robur cDNA clone WZ0AQRAS39YJ01CM1, mRNA sequence.
ePt_573696	YES	1.52342e-12	82.4379	FR606820	FR606820 WZOAFSCA Fagus sylvatica cDNA clone WZ0AFSCA31YN04FM1, mRNA sequence.
ePt_599434	YES	1.49242e-12	82.4379	DK462659	DK462659 full-length kale cDNA library (flowers) Brassica oleracea var. acephala cDNA clone KALE-018J12 5', mRNA sequence.
ePt_564971	YES	1.39499e-12	82.4379	EV279865	GLNAM90TF JCVI-SOY3 Glycine max cDNA 5', mRNA sequence.
ePt_600635	YES	1.39499e-12	82.4379	ES812561	UFL_313_14 Cotton fiber 0-10 day post anthesis Gossypium hirsutum cDNA, mRNA sequence.
ePt_639952	YES	1.39179e-12	84.2413	CN189777	UCRCS06_0002G12_r Washington Navel Orange Stored Fruit Rind cDNA Library Citrus sinensis cDNA clone CS_WEc0002G12, mRNA sequence.
ePt_565291	YES	1.35513e-12	82.4379	GT315531	iag04-6-i14.ab1 Iag04 Ipomopsis aggregata cDNA clone iag04-6-i14.ab1, mRNA sequence.
ePt_504738	YES	1.34747e-12	84.2413	CU399536	CU399536 LG0ABA Eucalyptus gunnii cDNA, mRNA sequence.
ePt_575137	YES	1.34185e-12	82.4379	FG486310	021104KAUB001267HT (KAUB) Actinidia chinensis CK51-05 petal Actinidia chinensis cDNA clone KAUBB00126, mRNA sequence.
ePt_573837	YES	1.30567e-12	84.2413	CU399536	CU399536 LG0ABA Eucalyptus gunnii cDNA, mRNA sequence.
ePt_570392	YES	1.29999e-12	82.4379	GO945601	CCII1929.b1 CCII Mimulus nasutus SF floral buds (H) Mimulus guttatus var. nasutus cDNA clone CCII1929 5', mRNA sequence.
ePt_567067	YES	1.29112e-12	82.4379	GO945601	CCII1929.b1 CCII Mimulus nasutus SF floral buds (H) Mimulus guttatus var. nasutus cDNA clone CCII1929 5', mRNA sequence.
ePt_641511	YES	1.28668e-12	82.4379	EY676059	CS00-C1-401-018-C03-CT.F Sweet orange leaf, infected with CiLV Citrus sinensis cDNA, mRNA sequence.
ePt_570788	YES	1.22013e-12	82.4379	DT764187	EST1198036 Aquilegia cDNA library Aquilegia formosa x Aquilegia pubescens cDNA clone CO1Z103, mRNA sequence.
ePt_599385	YES	1.19795e-12	82.4379	CX175024	C07_69-24_05.ab1 leaf inoculated with Marssonia pathogen of Populus deltoides Populus deltoides cDNA, mRNA sequence.
ePt_503585	YES	1.08259e-12	82.4379	GR180653	CBPG7790.g1 CBPG Mimulus guttatus IM62 roots, seedlings, fruits, callus (L) Mimulus guttatus cDNA clone CBPG7790 3', mRNA sequence.
ePt_572976	YES	1.00173e-12	84.2413	FS358051	FS358051 LjFL3 Lotus japonicus cDNA clone LjFL3-041-CA01.r0 3', mRNA sequence.
ePt_503819	YES	9.71341e-13	84.2413	CU399973	CU399973 LG0ABA Eucalyptus gunnii cDNA, mRNA sequence.
ePt_641111	YES	9.53611e-13	84.2413	DT757616	EST1191465 Aquilegia cDNA library Aquilegia formosa x Aquilegia pubescens cDNA clone CO1XY14, mRNA sequence.
ePt_637484	YES	9.44746e-13	84.2413	CU615957	CU615957 TPFERMI_A_KZ0AAN Theobroma cacao cDNA clone KZ0AAN6YA23FM1, mRNA sequence.
ePt_641555	YES	9.10553e-13	84.2413	CV301309	MM5_G07 Young roots probed with 3 and 7 week old root enriched transcripts Beta vulgaris cDNA, mRNA sequence.
ePt_641458	YES	9.05115e-13	82.4379	DT459188	GH_ON37E15.r GH_ON Gossypium hirsutum cDNA clone GH_ON37E15 3', mRNA sequence.
ePt_639119	YES	8.96622e-13	84.2413	EY848586	CA26-C1-002-080-C05-CT.F Sour orange leaf, field plant Citrus aurantium cDNA, mRNA sequence.
ePt_642055	YES	8.96622e-13	84.2413	EY848586	CA26-C1-002-080-C05-CT.F Sour orange leaf, field plant Citrus aurantium cDNA, mRNA sequence.
ePt_639585	YES	8.89024e-13	84.2413	CV301309	MM5_G07 Young roots probed with 3 and 7 week old root enriched transcripts Beta vulgaris cDNA, mRNA sequence.
ePt_563776	YES	8.87368e-13	82.4379	ES590747	000001601652_K08.ab1 Eucalyptus globulus under low temperature Eucalyptus globulus cDNA, mRNA sequence.
ePt_570065	YES	8.82692e-13	84.2413	CU402487	CU402487 LG0ABA Eucalyptus gunnii cDNA, mRNA sequence.
ePt_640401	YES	8.52298e-13	84.2413	FP027219	FP027219 LG0AAA Quercus robur cDNA clone LG0AAA2YN16RM1 similar to PplGI.3|TC61727 similar to UP|Q9LF43_ARATH Spindle pole body protein-like, mRNA sequence.
ePt_643793	YES	8.45966e-13	84.2413	EY883674	LT33-C1-003-087-B03-CT.F Tahiti lime leaf, greenhouse plant Citrus latifolia cDNA, mRNA sequence.
ePt_643652	YES	8.409e-13	84.2413	CO131417	GR__Eb43L05.f GR__Eb Gossypium raimondii cDNA clone GR__Eb43L05 5', mRNA sequence.
ePt_570716	YES	8.27255e-13	84.2413	FD491223	Ltu01b_73_F08_C012.g2 Liriodendron Flower Bud Library Liriodendron tulipifera cDNA clone 122Mhi_K15 5', mRNA sequence.
ePt_568455	YES	8.20911e-13	84.2413	CT981865	CT981865 Eucalyptus gunnii differentiating xylem AFOCEL clone 832 Eucalyptus gunnii cDNA, mRNA sequence.
ePt_572724	YES	7.45389e-13	82.4379	BW673130	BW673130 GMFL01 Glycine max cDNA clone GMFL01-35-L05 5', mRNA sequence.
ePt_571492	YES	7.29558e-13	84.2413	DY833357	CTOY9281.b1_A17.ab1 CTO(XYZ) dandelion Taraxacum officinale cDNA clone CTOY9281, mRNA sequence.
ePt_503332	YES	7.25751e-13	84.2413	FR605675	FR605675 WZOAFSCA Fagus sylvatica cDNA clone WZ0AFSCA2YK24NM1, mRNA sequence.
ePt_643135	YES	7.23214e-13	84.2413	DT546427	EST1057067 GH_TMO Gossypium hirsutum cDNA, mRNA sequence.
ePt_569173	YES	7.1687e-13	84.2413	DY833357	CTOY9281.b1_A17.ab1 CTO(XYZ) dandelion Taraxacum officinale cDNA clone CTOY9281, mRNA sequence.
ePt_599819	YES	7.15601e-13	84.2413	DT601375	wmi03-2ms3-d11 Wmi03 Welwitschia mirabilis cDNA clone wmi03-2ms3-d11 5', mRNA sequence.
ePt_569425	YES	6.90225e-13	84.2413	DT513877	WS02423.B21_E02 PTxD-ICC-N-A-14 Populus trichocarpa x Populus deltoides cDNA clone WS02423_E02 3', mRNA sequence.
ePt_564481	YES	6.83881e-13	84.2413	GO526025	Mdwdb7506F05.g1 Apple_EST_Mdwdb Malus x domestica cDNA 5' similar to emb|CAD41131.1| OSJNBa0084K20.11 [Oryza sativa (japonica cultivar-group)], mRNA sequence.
ePt_639025	YES	6.77537e-13	84.2413	GR472875	TTB7_CS30_H10 Sterility mosaic disease (SMD) challenged (45 DAS) pigeonpea genotype TTB7 leaf cDNA library Cajanus cajan cDNA clone TTB7_CS30_H10 5', mRNA sequence.
ePt_639957	YES	6.58505e-13	84.2413	EE487923	SD2MrF8 YG/PR Prunus cerasus cDNA, mRNA sequence.
ePt_569828	YES	6.54699e-13	84.2413	FP050900	FP050900 LG0AAC Quercus petraea cDNA clone LG0AAC10YP14RM1, mRNA sequence.
ePt_566821	YES	6.50892e-13	84.2413	CA764686	AF53-Rpf_04_I14_T7_053.ab1 IRRI Drought Stress Panicle Library Oryza sativa Indica Group cDNA clone C0001358 5' similar to Meiotic recombination protein DMC1 homolog., mRNA sequence.
ePt_570946	YES	6.50892e-13	84.2413	FS092901	FS092901 library SmFL Solanum melongena cDNA clone SmFL38O07 5', mRNA sequence.
ePt_573785	YES	6.30591e-13	84.2413	HO809013	vsu-ars_034046_LI15contig_12102 VSU-ARS-L15 Phaseolus acutifolius cDNA, mRNA sequence.
ePt_567320	YES	6.15366e-13	84.2413	BI097300	SCUM04-DS1-1 Melaleuca alternifolia (Cheel) mRNA Melaleuca alternifolia cDNA, mRNA sequence.
ePt_571682	YES	6.15366e-13	84.2413	BI097300	SCUM04-DS1-1 Melaleuca alternifolia (Cheel) mRNA Melaleuca alternifolia cDNA, mRNA sequence.
ePt_638276	YES	5.8999e-13	84.2413	EL369164	CCES5234.b1_C14.ab1 CCE(LMS) endive Cichorium endivia cDNA clone CCES5234, mRNA sequence.
ePt_636824	YES	5.88721e-13	84.2413	FS250083	FS250083 RPSC Glycyrrhiza uralensis cDNA clone KAN078-D19.F 5', mRNA sequence.
ePt_574130	YES	5.35432e-13	84.2413	EX292114	1579942_5_G04_010 PY06 Carica papaya cDNA, mRNA sequence.
ePt_571737	YES	5.32894e-13	84.2413	FN700402	FN700402 WZOAQRAR Quercus robur cDNA clone WZ0AQRAR5YD04NM1, mRNA sequence.
ePt_641972	YES	5.17669e-13	84.2413	CU404932	CU404932 LG0ABA Eucalyptus gunnii cDNA, mRNA sequence.
ePt_640185	YES	5.06249e-13	84.2413	FN698878	FN698878 WZOAQRAR Quercus robur cDNA clone WZ0AQRAR11YF19CM1, mRNA sequence.
ePt_638822	YES	4.88486e-13	84.2413	BI097300	SCUM04-DS1-1 Melaleuca alternifolia (Cheel) mRNA Melaleuca alternifolia cDNA, mRNA sequence.
ePt_641073	YES	4.82142e-13	84.2413	DT487053	WS02532.B21_K11 PT-MB-N-A-15 Populus trichocarpa cDNA clone WS02532_K11 3', mRNA sequence.
ePt_504111	YES	4.75798e-13	84.2413	EC926934	WIN0214.TB24_A06 Cab Sauv flower, leaf and root non-normalized (WIN02) Vitis vinifera cDNA clone WIN0214_A06 3', mRNA sequence.
ePt_571084	YES	4.73261e-13	84.2413	FG194527	AGN_PNL221dr1_h2.trimmed.seq AGN_PNL Nicotiana tabacum cDNA 3', mRNA sequence.
ePt_637563	YES	4.73261e-13	84.2413	CU618055	CU618055 TPFERMI_A_KZ0AAN Theobroma cacao cDNA clone KZ0AAN8YE17FM1, mRNA sequence.
ePt_564358	YES	4.26315e-13	84.2413	AM826120	AM826120 DL, diurnal library Nicotiana tabacum cDNA clone nt005171053, mRNA sequence.
ePt_570578	YES	4.06015e-13	84.2413	FD491223	Ltu01b_73_F08_C012.g2 Liriodendron Flower Bud Library Liriodendron tulipifera cDNA clone 122Mhi_K15 5', mRNA sequence.
ePt_573974	YES	3.95864e-13	84.2413	DT757123	EST1190972 Aquilegia cDNA library Aquilegia formosa x Aquilegia pubescens cDNA clone CO1XU95, mRNA sequence.
ePt_636480	YES	3.7517e-13	86.0446	AI974393	T110336e KV0 Medicago truncatula cDNA clone pKV0-1O5, mRNA sequence.
ePt_638561	YES	3.66462e-13	86.0446	BP137191	BP137191 MAT001 Nicotiana tabacum cDNA clone BY9862, mRNA sequence.
ePt_565722	YES	3.61014e-13	84.2413	FN731576	FN731576 WZOAQPAC Quercus petraea cDNA clone WZ0AQPAC1YN06CM1, mRNA sequence.
ePt_503604	YES	3.55929e-13	84.2413	HO055504	Cp0486 Cuphea paucipetala PI 534875 embryo Cuphea paucipetala cDNA clone Cp0486, mRNA sequence.
ePt_641713	YES	3.44489e-13	84.2413	HO055504	Cp0486 Cuphea paucipetala PI 534875 embryo Cuphea paucipetala cDNA clone Cp0486, mRNA sequence.
ePt_643470	YES	3.41946e-13	84.2413	CU579883	CU579883 MONILIOU_KZ0ABV Theobroma cacao cDNA clone KZ0ABV1YE20FM1, mRNA sequence.
ePt_570488	YES	3.26551e-13	86.0446	EE105895	SCB01636 Inflorescence with GA3 (VvS12) Vitis vinifera cDNA clone SCB01636, mRNA sequence.
ePt_600503	YES	3.17117e-13	86.0446	DW513603	GH_TMIRS_174_E06_F Cotton Normalized Library dT primed Gossypium hirsutum cDNA, mRNA sequence.
ePt_565633	YES	3.16523e-13	84.2413	EX268133	1448522_5_G08_026 PY06 Carica papaya cDNA, mRNA sequence.
ePt_637457	YES	3.16029e-13	86.0446	EY842105	PT11-C9-005-047-D07-CT.F Poncirus trifoliata seed, field plant Citrus trifoliata cDNA, mRNA sequence.
ePt_564735	YES	3.15666e-13	86.0446	CN847708	PG07040H07 Ginseng cDNA library from MeJA treated hairy root Panax ginseng cDNA clone PG07040H07 5', mRNA sequence.
ePt_643998	YES	2.97455e-13	84.2413	FR617106	FR617106 WZOAFSAA Fagus sylvatica cDNA clone WZ0AFSAA21YO22FM1, mRNA sequence.
ePt_504039	YES	2.91719e-13	86.0446	EL891107	CGF2003236_H09 WLN-02: walnut leaf from plants infected with Pratylenchus vulnus Juglans hindsii x Juglans regia cDNA clone WLN-02-1_III_H09 5', mRNA sequence.
ePt_564887	YES	2.84462e-13	86.0446	HO802032	vsu-ars_027065_LI15contig_10957 VSU-ARS-L15 Phaseolus acutifolius cDNA, mRNA sequence.
ePt_640825	YES	2.56161e-13	86.0446	CF512371	CAbud0003_IIF_F04 Vitis vinifera cv. cabernet sauvignon (Clone 8) Bud - CABUD Vitis vinifera cDNA clone CAbud0003_IIF_F04 5', mRNA sequence.
ePt_641549	YES	2.38103e-13	86.0446	EY836210	PT11-C2-301-044-A03-CT.F Poncirus trifoliata bark, infected with Phytophthora parasitica Citrus trifoliata cDNA, mRNA sequence.
ePt_563449	YES	2.31923e-13	86.0446	DT033661	VVL084C02_688948 CabSau Berry Postveraison Mixed Stages 36-38 (Brix > 15) under water deficit stress Vitis vinifera cDNA clone VVL084C02 5, mRNA sequence.
ePt_564299	YES	2.15202e-13	86.0446	DY833357	CTOY9281.b1_A17.ab1 CTO(XYZ) dandelion Taraxacum officinale cDNA clone CTOY9281, mRNA sequence.
ePt_566609	YES	2.14111e-13	86.0446	GO526025	Mdwdb7506F05.g1 Apple_EST_Mdwdb Malus x domestica cDNA 5' similar to emb|CAD41131.1| OSJNBa0084K20.11 [Oryza sativa (japonica cultivar-group)], mRNA sequence.
ePt_572120	YES	2.14111e-13	86.0446	GO526025	Mdwdb7506F05.g1 Apple_EST_Mdwdb Malus x domestica cDNA 5' similar to emb|CAD41131.1| OSJNBa0084K20.11 [Oryza sativa (japonica cultivar-group)], mRNA sequence.
ePt_567252	YES	2.09744e-13	84.2413	ES432337	EST1232544 ESTSYN-F Musa acuminata AAA Group cDNA clone pESTSYNF-6J8 5', mRNA sequence.
ePt_568063	YES	2.03205e-13	86.0446	FE672185	mh1_0015_A11 Drought-stressed chickpea leave library Cicer arietinum cDNA clone mh1_0015_A11 5', mRNA sequence.
ePt_574763	YES	2.01024e-13	86.0446	FC911297	IC0AAA63DC04RM1 IVIA1 Citrus clementina cDNA clone IC0AAA63DC04, mRNA sequence.
ePt_642150	YES	2.01024e-13	86.0446	FC911297	IC0AAA63DC04RM1 IVIA1 Citrus clementina cDNA clone IC0AAA63DC04, mRNA sequence.
ePt_638611	YES	1.94845e-13	86.0446	FC911297	IC0AAA63DC04RM1 IVIA1 Citrus clementina cDNA clone IC0AAA63DC04, mRNA sequence.
ePt_565085	YES	1.93754e-13	86.0446	EH776226	CNSM8518.b1_K17.ab1 CNS(LMS) yellow starthistle Centaurea solstitialis cDNA clone CNSM8518, mRNA sequence.
ePt_567706	YES	1.93391e-13	86.0446	ES796936	UFL_542_95 Cotton fiber 0-10 day post anthesis Gossypium hirsutum cDNA, mRNA sequence.
ePt_573261	YES	1.7193e-13	84.2413	CU639538	CU639538 Quercus robur SSH1 Quercus robur cDNA clone SSH1GFPL1G04, mRNA sequence.
ePt_600429	YES	1.70489e-13	86.0446	BI926188	EST546077 tomato flower, buds 0-3 mm Solanum lycopersicum cDNA clone cTOA28P8 5' end, mRNA sequence.
ePt_502872	YES	1.66127e-13	86.0446	EC948694	WIN0536.C21_G14 Cab Sauv flower, leaf and root normalized (WIN05) Vitis vinifera cDNA clone WIN0536_G14 3', mRNA sequence.
ePt_564991	YES	1.66127e-13	86.0446	EC948694	WIN0536.C21_G14 Cab Sauv flower, leaf and root normalized (WIN05) Vitis vinifera cDNA clone WIN0536_G14 3', mRNA sequence.
ePt_571207	YES	1.66127e-13	86.0446	EC948694	WIN0536.C21_G14 Cab Sauv flower, leaf and root normalized (WIN05) Vitis vinifera cDNA clone WIN0536_G14 3', mRNA sequence.
ePt_563983	YES	1.64673e-13	86.0446	CU405436	CU405436 LG0ABA Eucalyptus gunnii cDNA, mRNA sequence.
ePt_599683	YES	1.62492e-13	86.0446	EY820234	PT11-C1-901-014-H12-CT.F Poncirus trifoliata leaf, infected with CTV Citrus trifoliata cDNA, mRNA sequence.
ePt_565885	YES	1.59947e-13	86.0446	CU533184	CU533184 TEGPULI_KZ0AAI_K Theobroma cacao cDNA clone KZ0AAK7YI09FM1, mRNA sequence.
ePt_641580	YES	1.59584e-13	86.0446	EW688278	QSB072 nine-year-old eucalypt xylem library Eucalyptus grandis cDNA, mRNA sequence.
ePt_570145	YES	1.52677e-13	86.0446	CB340021	CA23EI02IVFb_A04 Cabernet Sauvignon Leaf - CA23EI Vitis vinifera cDNA clone CA23EI02IVFb_A04 5', mRNA sequence.
ePt_570729	YES	1.52677e-13	86.0446	CB340021	CA23EI02IVFb_A04 Cabernet Sauvignon Leaf - CA23EI Vitis vinifera cDNA clone CA23EI02IVFb_A04 5', mRNA sequence.
ePt_566249	YES	1.4577e-13	86.0446	FR665254	FR665254 WZ0AQSAA Quercus suber cDNA clone WZ0AQSAA7YD19CM3, mRNA sequence.
ePt_575743	YES	1.45043e-13	86.0446	CU508976	CU508976 PODSSHWB2Sb_KZ0ACF Theobroma cacao cDNA clone KZ0ACF5YA09FM1, mRNA sequence.
ePt_503857	YES	1.44679e-13	86.0446	DN923166	45368.3 Common Scab-Challenged Tubers Solanum tuberosum cDNA clone 45368 3', mRNA sequence.
ePt_575424	YES	1.44679e-13	86.0446	FG498546	030417KAWC010262HT (KAWC) Actinidia chinensis - active meristems Actinidia chinensis cDNA clone KAWCC01026, mRNA sequence.
ePt_638218	YES	1.35228e-13	86.0446	FG194527	AGN_PNL221dr1_h2.trimmed.seq AGN_PNL Nicotiana tabacum cDNA 3', mRNA sequence.
ePt_641666	YES	1.33774e-13	86.0446	ES595505	000001603352_P17.ab1 Eucalyptus globulus under low temperature Eucalyptus globulus cDNA, mRNA sequence.
ePt_642372	YES	1.21778e-13	86.0446	CV288528	aof01-5ms3-a12 Aof01 Asparagus officinalis cDNA clone aof01-5ms3-a12 5', mRNA sequence.
ePt_600528	YES	1.15962e-13	86.0446	CV046502	EST 8209 Green Apricot Fruit Lambda Zap II Library Prunus armeniaca cDNA clone bga009a16q 5', mRNA sequence.
ePt_564530	YES	1.14508e-13	86.0446	ES812561	UFL_313_14 Cotton fiber 0-10 day post anthesis Gossypium hirsutum cDNA, mRNA sequence.
ePt_641804	YES	1.13417e-13	86.0446	CN876911	020815AARA010053HT (AARA) Royal Gala partially senescing leaf Malus x domestica cDNA clone AARA010053, mRNA sequence.
ePt_503818	YES	1.1269e-13	86.0446	GR052626	CCIC26335.b1 CCIC Mimulus guttatus IM62 roots (H) Mimulus guttatus cDNA clone CCIC26335 5', mRNA sequence.
ePt_639529	YES	1.12326e-13	86.0446	FR601535	FR601535 WZOAFSCA Fagus sylvatica cDNA clone WZ0AFSCA22YE19FM1, mRNA sequence.
ePt_640919	YES	1.12326e-13	86.0446	CN926083	000430AEPA001144HT (AEPA) Pinkie expanding leaf Malus x domestica cDNA clone AEPA001144, mRNA sequence.
ePt_641838	YES	1.12062e-13	87.848	GE580597	CCPU4836.b1_G10.ab1 CCP(UWX) Globe Artichoke Cynara cardunculus var. scolymus cDNA clone CCPU4836, mRNA sequence.
ePt_574403	YES	1.11236e-13	86.0446	CN926083	000430AEPA001144HT (AEPA) Pinkie expanding leaf Malus x domestica cDNA clone AEPA001144, mRNA sequence.
ePt_575303	YES	1.05982e-13	86.0446	FG492513	030610KAWC012506HT (KAWC) Actinidia chinensis - active meristems Actinidia chinensis cDNA clone KAWCC01250, mRNA sequence.
ePt_504225	YES	1.01247e-13	86.0446	BI921685	EST541577 tomato callus Solanum lycopersicum cDNA clone cLEC74C10 5' end, mRNA sequence.
ePt_564398	YES	1.00519e-13	86.0446	FF393535	MOODO01TF MOO Vigna unguiculata cDNA 5', mRNA sequence.
ePt_564748	YES	1.00519e-13	86.0446	FF393535	MOODO01TF MOO Vigna unguiculata cDNA 5', mRNA sequence.
ePt_566994	YES	1.00519e-13	86.0446	FF393535	MOODO01TF MOO Vigna unguiculata cDNA 5', mRNA sequence.
ePt_642152	YES	1.00519e-13	86.0446	FF393535	MOODO01TF MOO Vigna unguiculata cDNA 5', mRNA sequence.
ePt_567981	YES	9.17911e-14	87.848	EE105895	SCB01636 Inflorescence with GA3 (VvS12) Vitis vinifera cDNA clone SCB01636, mRNA sequence.
ePt_641815	YES	8.85001e-14	86.0446	BU892290	P061G07 Populus petioles cDNA library Populus tremula cDNA 5 prime, mRNA sequence.
ePt_569611	YES	8.0852e-14	86.0446	CD716073	VVB220D08_435413 An expressed sequence tag database for abiotic stressed leaves of Vitis vinifera var. Chardonnay Vitis vinifera cDNA clone VVB220D08 5, mRNA sequence.
ePt_641034	YES	7.48467e-14	87.848	ES839014	UFL_049_61 Cotton fiber 0-10 day post anthesis Gossypium hirsutum cDNA, mRNA sequence.
ePt_568916	YES	7.45348e-14	87.848	CF512371	CAbud0003_IIF_F04 Vitis vinifera cv. cabernet sauvignon (Clone 8) Bud - CABUD Vitis vinifera cDNA clone CAbud0003_IIF_F04 5', mRNA sequence.
ePt_503545	YES	7.4119e-14	87.848	ES830930	UFL_431_19 Cotton fiber 0-10 day post anthesis Gossypium hirsutum cDNA, mRNA sequence.
ePt_564938	YES	7.24557e-14	87.848	FN709784	FN709784 WZOAQPAB Quercus petraea cDNA clone WZ0AQPAB2YL14FM1, mRNA sequence.
ePt_643263	YES	7.20399e-14	87.848	EX245260	PY04012X1F02.f1 PY04 Carica papaya cDNA, mRNA sequence.
ePt_572160	YES	7.11043e-14	87.848	CN845627	PG07003B08 Ginseng cDNA library from MeJA treated hairy root Panax ginseng cDNA clone PG07003B08 5', mRNA sequence.
ePt_570602	YES	6.26978e-14	87.848	FS409885	FS409885 normalized full-length tobacco cDNA library Nicotiana tabacum cDNA clone TBK02GR0025_3_F01 5', mRNA sequence.
ePt_562944	YES	5.98857e-14	87.848	DY833357	CTOY9281.b1_A17.ab1 CTO(XYZ) dandelion Taraxacum officinale cDNA clone CTOY9281, mRNA sequence.
ePt_567566	YES	5.97816e-14	87.848	DY833357	CTOY9281.b1_A17.ab1 CTO(XYZ) dandelion Taraxacum officinale cDNA clone CTOY9281, mRNA sequence.
ePt_573772	YES	5.84276e-14	87.848	GW835234	FES005A07_8429 Ficus elastica stem cDNA library (FES) Ficus elastica cDNA clone FES005A07, mRNA sequence.
ePt_573262	YES	5.83235e-14	87.848	DT601375	wmi03-2ms3-d11 Wmi03 Welwitschia mirabilis cDNA clone wmi03-2ms3-d11 5', mRNA sequence.
ePt_574710	YES	5.83235e-14	87.848	DT601375	wmi03-2ms3-d11 Wmi03 Welwitschia mirabilis cDNA clone wmi03-2ms3-d11 5', mRNA sequence.
ePt_565828	YES	5.73862e-14	87.848	FC911297	IC0AAA63DC04RM1 IVIA1 Citrus clementina cDNA clone IC0AAA63DC04, mRNA sequence.
ePt_600656	YES	5.73862e-14	87.848	ES796936	UFL_542_95 Cotton fiber 0-10 day post anthesis Gossypium hirsutum cDNA, mRNA sequence.
ePt_567828	YES	5.71779e-14	87.848	ES796936	UFL_542_95 Cotton fiber 0-10 day post anthesis Gossypium hirsutum cDNA, mRNA sequence.
ePt_569403	YES	5.33243e-14	87.848	ES591387	000001601852_K11.ab1 Eucalyptus globulus under low temperature Eucalyptus globulus cDNA, mRNA sequence.
ePt_570443	YES	5.11372e-14	87.848	CN845627	PG07003B08 Ginseng cDNA library from MeJA treated hairy root Panax ginseng cDNA clone PG07003B08 5', mRNA sequence.
ePt_503575	YES	4.9575e-14	87.848	FS250083	FS250083 RPSC Glycyrrhiza uralensis cDNA clone KAN078-D19.F 5', mRNA sequence.
ePt_574132	YES	4.93667e-14	87.848	CB007283	VVC043F04_141622 An expressed sequence tag database for abiotic stressed berries of Vitis vinifera var. Chardonnay Vitis vinifera cDNA clone VVC043F04 5, mRNA sequence.
ePt_503565	YES	4.80127e-14	87.848	ES591387	000001601852_K11.ab1 Eucalyptus globulus under low temperature Eucalyptus globulus cDNA, mRNA sequence.
ePt_564901	YES	4.50966e-14	87.848	CN845627	PG07003B08 Ginseng cDNA library from MeJA treated hairy root Panax ginseng cDNA clone PG07003B08 5', mRNA sequence.
ePt_504219	YES	4.40551e-14	87.848	FD492400	Ltu01b_90_C10_C012.g2 Liriodendron Flower Bud Library Liriodendron tulipifera cDNA clone 122Mhk_E20 5', mRNA sequence.
ePt_571667	YES	4.37426e-14	87.848	CB340021	CA23EI02IVFb_A04 Cabernet Sauvignon Leaf - CA23EI Vitis vinifera cDNA clone CA23EI02IVFb_A04 5', mRNA sequence.
ePt_641028	YES	4.17638e-14	87.848	EH712282	CNML11894.b1_L22.ab1 CNM(LMS) spotted knapweed Centaurea maculosa cDNA clone CNML11894, mRNA sequence.
ePt_566350	YES	4.15555e-14	87.848	CN845627	PG07003B08 Ginseng cDNA library from MeJA treated hairy root Panax ginseng cDNA clone PG07003B08 5', mRNA sequence.
ePt_563231	YES	4.09306e-14	87.848	DT513877	WS02423.B21_E02 PTxD-ICC-N-A-14 Populus trichocarpa x Populus deltoides cDNA clone WS02423_E02 3', mRNA sequence.
ePt_569470	YES	3.86393e-14	87.848	EL901365	CGF2003313_C01 WRO-02: Walnut root Juglans hindsii x Juglans regia cDNA clone WRO-02-3_IV_C01 5', mRNA sequence.
ePt_570811	YES	3.40568e-14	87.848	ES441793	TSH_EST00291 Theobroma cacao-Moniliophthora perniciosa incompatible interaction library Theobroma cacao cDNA clone RT-002D08 5' similar to Arabidopsis thaliana Full-length cDNA Complete sequence from clone GSLTPGH55ZB02 of Hormone Treated Callus of strain col-0 of Arabidopsis thaliana (thale cress) Length=1341, mRNA sequence.
ePt_568218	YES	3.23148e-14	89.6514	GO917699	CMLMEa0001G10f CMLMEa Castanea mollissima cDNA, mRNA sequence.
ePt_563253	YES	3.21821e-14	87.848	BJ569444	BJ569444 Ipomoea nil mixture of flower and flower bud Ipomoea nil cDNA clone jm5j22 3', mRNA sequence.
ePt_642527	YES	3.15572e-14	87.848	GT622745	LCUSE1NG_T3_046_C07_14JUN2007_059 LCUSE1NG Lens culinaris cDNA, mRNA sequence.
ePt_599728	YES	3.14077e-14	87.848	BJ569444	BJ569444 Ipomoea nil mixture of flower and flower bud Ipomoea nil cDNA clone jm5j22 3', mRNA sequence.
ePt_570618	YES	3.09746e-14	89.6514	CO416676	Mdfr3008m14.y3 Mdfr Malus x domestica cDNA clone Mdfr3008m14 5' similar to TR:Q9SCL5 Q9SCL5 HYPOTHETICAL 64.6 KD PROTEIN. [1] ;, mRNA sequence.
ePt_569673	YES	3.04686e-14	87.848	HO055504	Cp0486 Cuphea paucipetala PI 534875 embryo Cuphea paucipetala cDNA clone Cp0486, mRNA sequence.
ePt_643804	YES	2.99469e-14	87.848	FR617106	FR617106 WZOAFSAA Fagus sylvatica cDNA clone WZ0AFSAA21YO22FM1, mRNA sequence.
ePt_641446	YES	2.85904e-14	87.848	ES591387	000001601852_K11.ab1 Eucalyptus globulus under low temperature Eucalyptus globulus cDNA, mRNA sequence.
ePt_565905	YES	2.82643e-14	89.6514	FC066068	sT7aVVM014L17069 VVM Vitis vinifera cDNA clone VVM014L17069 5' similar to emb_CAO49501.1 unnamed protein product [Vitis vinifera]. Expect = 2e-117, mRNA sequence.
ePt_503279	YES	2.70134e-14	89.6514	GO917699	CMLMEa0001G10f CMLMEa Castanea mollissima cDNA, mRNA sequence.
ePt_644043	YES	2.70134e-14	89.6514	BP137156	BP137156 MAT001 Nicotiana tabacum cDNA clone BY9823, mRNA sequence.
ePt_503754	YES	2.68165e-14	87.848	GO982812	CCIG5154.b1 CCIG Mimulus guttatus DUN10 floral buds (H) Mimulus guttatus cDNA clone CCIG5154 5', mRNA sequence.
ePt_642156	YES	2.67156e-14	89.6514	CK745864	eca01-12cs3-g07 Eca01 Eschscholzia californica cDNA clone eca01-12cs3-g07 5', mRNA sequence.
ePt_503816	YES	2.18907e-14	89.6514	GT971560	GJCCJC2021H09.b Jatropha curcas L. developing seeds (mixed stages) Jatropha curcas cDNA clone GJCCJC2021H09 similar to cholinephosphate cytidylyltransferase, putative / phosphorylcholine transferase, putative / CTP:phosphocholine cytidylyltransferase, putative, mRNA sequence.
ePt_643493	YES	2.18907e-14	89.6514	CB342524	CA32EN0003_IIaR_G05 Cabernet Sauvignon Leaf - CA32EN Vitis vinifera cDNA clone CA32EN0003_IIaR_G05 3', mRNA sequence.
ePt_568640	YES	2.02228e-14	89.6514	AM288075	AM288075 Prunus persica fruit skin mature fruit Prunus persica cDNA clone Skin38H07, mRNA sequence.
ePt_504062	YES	1.84705e-14	89.6514	EV239621	VV_PEd0008d03.g1 Vitis vinifera cv. perlette LibD Vitis vinifera cDNA, mRNA sequence.
ePt_639800	YES	1.71575e-14	89.6514	DY833357	CTOY9281.b1_A17.ab1 CTO(XYZ) dandelion Taraxacum officinale cDNA clone CTOY9281, mRNA sequence.
ePt_640966	YES	1.68293e-14	89.6514	FR607115	FR607115 WZOAFSCA Fagus sylvatica cDNA clone WZ0AFSCA32YF08FM1, mRNA sequence.
ePt_574969	YES	1.64864e-14	87.848	HS270795	CCXA13605.b1 CCXA Euonymus alatus seed tissues collected from 8/14 to 9/19/2007 normalized Euonymus alatus cDNA clone CCXA13605 5', mRNA sequence.
ePt_575678	YES	1.63817e-14	89.6514	CA409540	107_F -P proteoid roots 12 and 14 DAE Lupinus albus cDNA clone 107 5', mRNA sequence.
ePt_565676	YES	1.59938e-14	89.6514	FG227720	cucurbitaSpp_005874 Cucurbita maxima (winter squash) phloem Cucurbita maxima cDNA, mRNA sequence.
ePt_564407	YES	1.50091e-14	89.6514	FD536718	RR2EH86JQ RR2(MS) Raphanus raphanistrum subsp. raphanistrum cDNA 3', mRNA sequence.
ePt_564455	YES	1.50091e-14	89.6514	FD536718	RR2EH86JQ RR2(MS) Raphanus raphanistrum subsp. raphanistrum cDNA 3', mRNA sequence.
ePt_568679	YES	1.45019e-14	89.6514	CK861258	32320 In vitro Root Solanum tuberosum cDNA, mRNA sequence.
ePt_600091	YES	1.31591e-14	89.6514	GO560056	Mdfrt3062G12_e10344.g1 Mdfrt Malus x domestica cDNA 5' similar to ref|NP_187413.1| hypothetical protein [Arabidopsis thaliana] gb|AAO22562.1| unknown protein [Arabidopsis thaliana], mRNA sequence.
ePt_573883	YES	1.27413e-14	89.6514	ES595866	000001603752_D03.ab1 Eucalyptus globulus under low temperature Eucalyptus globulus cDNA, mRNA sequence.
ePt_642666	YES	1.27115e-14	89.6514	ES595866	000001603752_D03.ab1 Eucalyptus globulus under low temperature Eucalyptus globulus cDNA, mRNA sequence.
ePt_571357	YES	1.26518e-14	89.6514	GO248000	EgTS_3F4 Eucalyptus globulus C14 clone shoot apex under hydric stress Eucalyptus globulus cDNA, mRNA sequence.
ePt_638783	YES	1.19357e-14	89.6514	CU396036	CU396036 LG0ABA Eucalyptus gunnii cDNA, mRNA sequence.
ePt_564910	YES	1.16373e-14	89.6514	BP935809	BP935809 full-length enriched poplar cDNA library Populus nigra cDNA clone PnFL1-081_G04.r 3', mRNA sequence.
ePt_570043	YES	1.07421e-14	89.6514	CU404362	CU404362 LG0ABA Eucalyptus gunnii cDNA, mRNA sequence.
ePt_567997	YES	1.04437e-14	89.6514	CU584277	CU584277 OVULEI_KZ0AAB Theobroma cacao cDNA clone KZ0AAB1YL18, mRNA sequence.
ePt_565983	YES	1.0205e-14	89.6514	FD415465	1_SM-JB_L12-B01_T3__B01_3100406_03_ab1 CrUniGene leaf Catharanthus roseus cDNA similar to Hexokinase, mRNA sequence.
ePt_569064	YES	1.0026e-14	89.6514	CX175024	C07_69-24_05.ab1 leaf inoculated with Marssonia pathogen of Populus deltoides Populus deltoides cDNA, mRNA sequence.
ePt_569443	YES	9.99614e-15	89.6514	CX175024	C07_69-24_05.ab1 leaf inoculated with Marssonia pathogen of Populus deltoides Populus deltoides cDNA, mRNA sequence.
ePt_639473	YES	9.99614e-15	89.6514	CX175024	C07_69-24_05.ab1 leaf inoculated with Marssonia pathogen of Populus deltoides Populus deltoides cDNA, mRNA sequence.
ePt_565043	YES	9.72758e-15	89.6514	AM826120	AM826120 DL, diurnal library Nicotiana tabacum cDNA clone nt005171053, mRNA sequence.
ePt_565839	YES	8.66961e-15	89.6514	ES721082	TFR5_32_B12_E001.g1 USDA-Tifton Peanut Library TFR5 Arachis hypogaea cDNA clone TFR5-032-90_B12 5', mRNA sequence.
ePt_565860	YES	8.66961e-15	89.6514	ES721082	TFR5_32_B12_E001.g1 USDA-Tifton Peanut Library TFR5 Arachis hypogaea cDNA clone TFR5-032-90_B12 5', mRNA sequence.
ePt_504768	YES	8.10639e-15	91.4547	EE067316	C2B07685 Buds/little clusters (VvC2) Vitis vinifera cDNA clone C2B07685, mRNA sequence.
ePt_564831	YES	7.98693e-15	91.4547	GT027534	ERibbud01_SQ05_D7_D07_015 Ribes nigrum Ben Hope pooled bud (SCRI_Rn_bud_cDNA) Ribes nigrum cDNA, mRNA sequence.
ePt_641866	YES	7.91013e-15	91.4547	FG900094	UCRVU08_CCNS16247_g1 Cowpea IT97K-461-4 Mixed Tissue and Conditions cDNA Library UCRVU08-1-2 Vigna unguiculata cDNA clone CCNS16247.g1, mRNA sequence.
ePt_637566	YES	7.01416e-15	91.4547	AJ806947	AJ806947 Antirrhinum majus whole plant Antirrhinum majus cDNA clone 018_6_05_g01, mRNA sequence.
ePt_640781	YES	6.96296e-15	91.4547	CX533624	s13dNF0HG04MJ024_320401 Methyl Jasmonate-Elicited Root Cell Suspension Culture Medicago truncatula cDNA, mRNA sequence.
ePt_572815	YES	6.38271e-15	91.4547	FP042764	FP042764 LG0AAC Quercus petraea cDNA clone LG0AAC5YJ19RM1 similar to YBEG_SCHPO Uncharacterized WD repeat-containing protein C17D11.16. - Schizosaccharomyces pombe, mRNA sequence.
ePt_569118	YES	6.00893e-15	89.6514	GO500400	Mdrtc1027A03.g1 Apple_EST_Mdrtc Malus hybrid rootstock cDNA 5', mRNA sequence.
ePt_642698	YES	6.00893e-15	89.6514	GO500400	Mdrtc1027A03.g1 Apple_EST_Mdrtc Malus hybrid rootstock cDNA 5', mRNA sequence.
ePt_568801	YES	5.6082e-15	91.4547	FR622682	FR622682 WZOAFSAA Fagus sylvatica cDNA clone WZ0AFSAA49YL16FM1, mRNA sequence.
ePt_565869	YES	5.04396e-15	91.4547	DR542674	WS01039.B21_F24 SS-R-N-A-11 Picea sitchensis cDNA clone WS01039_F24 3, mRNA sequence.
ePt_503841	YES	5.01831e-15	91.4547	DR542674	WS01039.B21_F24 SS-R-N-A-11 Picea sitchensis cDNA clone WS01039_F24 3, mRNA sequence.
ePt_568329	YES	4.9626e-15	89.6514	GW337786	EgRL_386 Eucalyptus globulus C14 clone root apex under water stress Eucalyptus globulus cDNA, mRNA sequence.
ePt_600163	YES	4.87297e-15	91.4547	FR605675	FR605675 WZOAFSCA Fagus sylvatica cDNA clone WZ0AFSCA2YK24NM1, mRNA sequence.
ePt_503748	YES	4.77893e-15	91.4547	EY798019	CR05-C3-701-058-H11-CT.F Mandarin fruit, development stadium (2 of 3) Citrus reticulata cDNA, mRNA sequence.
ePt_638063	YES	4.70199e-15	91.4547	EX257207	1437357_5_F03_012 PY06 Carica papaya cDNA, mRNA sequence.
ePt_599500	YES	4.62505e-15	91.4547	FR605675	FR605675 WZOAFSCA Fagus sylvatica cDNA clone WZ0AFSCA2YK24NM1, mRNA sequence.
ePt_641521	YES	4.57376e-15	91.4547	DT042605	Mdrtp1005F22.g1 Apple_EST_Mdrtp Malus x domestica x Malus sieversii cDNA similar to ref|NP_182078.1| expressed protein [Arabidopsis thaliana] pir|T00867 hypothetical protein At2g45540 [imported] - Arabidopsis thaliana gb|AAC06163.1| unknown protein [Arabidopsis thaliana], mRNA sequence.
ePt_569313	YES	4.55666e-15	91.4547	FS351514	FS351514 LjFL3 Lotus japonicus cDNA clone LjFL3-020-DH10.r0 3', mRNA sequence.
ePt_562878	YES	4.46262e-15	91.4547	CT009871	CT009871 Quercus petraea SSH Quercus petraea cDNA clone F07D02, mRNA sequence.
ePt_504799	YES	4.41987e-15	91.4547	HO047969	CVSOVPREAN146 Library from pre anthesis stages of ovules of polyembryonic Citrus sinensis Citrus sinensis cDNA, mRNA sequence.
ePt_568572	YES	4.37713e-15	91.4547	FS351514	FS351514 LjFL3 Lotus japonicus cDNA clone LjFL3-020-DH10.r0 3', mRNA sequence.
ePt_565705	YES	4.23179e-15	91.4547	ES591387	000001601852_K11.ab1 Eucalyptus globulus under low temperature Eucalyptus globulus cDNA, mRNA sequence.
ePt_568680	YES	4.05226e-15	91.4547	EC993941	WIN1149.C21_O09 Muscat Hamburg pre-veraison berry normalized (WIN11) Vitis vinifera cDNA clone WIN1149_O09 3', mRNA sequence.
ePt_572941	YES	4.02662e-15	91.4547	CN927340	000530AEPA003070HT (AEPA) Pinkie expanding leaf Malus x domestica cDNA clone AEPA003070, mRNA sequence.
ePt_503377	YES	3.86418e-15	91.4547	CU404972	CU404972 LG0ABA Eucalyptus gunnii cDNA, mRNA sequence.
ePt_568970	YES	3.86418e-15	91.4547	CU404972	CU404972 LG0ABA Eucalyptus gunnii cDNA, mRNA sequence.
ePt_569933	YES	3.86418e-15	91.4547	CU404972	CU404972 LG0ABA Eucalyptus gunnii cDNA, mRNA sequence.
ePt_641508	YES	3.86418e-15	91.4547	CU404972	CU404972 LG0ABA Eucalyptus gunnii cDNA, mRNA sequence.
ePt_642482	YES	3.85563e-15	91.4547	CU404972	CU404972 LG0ABA Eucalyptus gunnii cDNA, mRNA sequence.
ePt_574640	YES	3.75305e-15	91.4547	GE513547	CCFT9010.g1_D21.ab1 CCF(STU) sunflower Helianthus annuus cDNA clone CCFT9010, mRNA sequence.
ePt_638187	YES	3.73595e-15	91.4547	CT982014	CT982014 Eucalyptus gunnii differentiating xylem AFOCEL clone 832 Eucalyptus gunnii cDNA, mRNA sequence.
ePt_574128	YES	3.60771e-15	91.4547	EX292114	1579942_5_G04_010 PY06 Carica papaya cDNA, mRNA sequence.
ePt_503338	YES	3.24865e-15	91.4547	GT979480	JGCCJG2032H03.b Jatropha curcas L. germinating seeds (mixed stages) Jatropha curcas cDNA clone JGCCJG2032H03 similar to cell cycle control protein-related, mRNA sequence.
ePt_567516	YES	2.94943e-15	91.4547	GO248012	EgTS_3G6 Eucalyptus globulus C14 clone shoot apex under hydric stress Eucalyptus globulus cDNA, mRNA sequence.
ePt_637351	YES	2.90669e-15	91.4547	DV446588	CV01019A2G04.f1 CV01-normalized library Manihot esculenta cDNA clone CV01019A2G04.f1, mRNA sequence.
ePt_637136	YES	2.66731e-15	91.4547	DT757123	EST1190972 Aquilegia cDNA library Aquilegia formosa x Aquilegia pubescens cDNA clone CO1XU95, mRNA sequence.
ePt_504640	YES	2.64167e-15	91.4547	BP956693	BP956693 Euphorbia tirucalli callus induced from stem Euphorbia tirucalli cDNA clone ETC077E04 5', mRNA sequence.
ePt_565288	YES	2.61602e-15	91.4547	DK574480	DK574480 full-length kale cDNA library (flowers) Brassica oleracea var. acephala cDNA clone KALE-155D20 3', mRNA sequence.
ePt_503600	YES	2.59037e-15	91.4547	GT742384	CCCG1140.b1 CCCG Cercospora beticola infected sugar beet leaves Cercospora beticola cDNA clone CCCG1140 5', mRNA sequence.
ePt_504272	YES	2.47898e-15	93.2581	DY827816	CTOY3558.b1_L01.ab1 CTO(XYZ) dandelion Taraxacum officinale cDNA clone CTOY3558, mRNA sequence.
ePt_575011	YES	2.09271e-15	93.2581	DV134695	CV03109A2B07.f1 CV03-normalized library Euphorbia esula cDNA clone CV03109A2B07.f1 5, mRNA sequence.
ePt_639829	YES	1.82379e-15	93.2581	CB342524	CA32EN0003_IIaR_G05 Cabernet Sauvignon Leaf - CA32EN Vitis vinifera cDNA clone CA32EN0003_IIaR_G05 3', mRNA sequence.
ePt_564606	YES	1.69422e-15	93.2581	GO024068	LJMCN42TF JCVI-LJ2 Lotus japonicus cDNA 5', mRNA sequence.
ePt_642795	YES	1.68933e-15	93.2581	ES591097	000001601752_L17.ab1 Eucalyptus globulus under low temperature Eucalyptus globulus cDNA, mRNA sequence.
ePt_565208	YES	1.68688e-15	93.2581	FP050900	FP050900 LG0AAC Quercus petraea cDNA clone LG0AAC10YP14RM1, mRNA sequence.
ePt_503946	YES	1.64532e-15	93.2581	AJ776356	AJ776356 Populus euphratica root 3-6 months Populus euphratica cDNA clone P0000400012B06F1, mRNA sequence.
ePt_564210	YES	1.60922e-15	93.2581	FR622682	FR622682 WZOAFSAA Fagus sylvatica cDNA clone WZ0AFSAA49YL16FM1, mRNA sequence.
ePt_636800	YES	1.57983e-15	93.2581	CD798086	EST 14467 Ripe Grape (harvested at 5 p.m.) Pedicles Lambda Triplex2 Library Vitis vinifera cDNA clone P3CH05RP009A07 3', mRNA sequence.
ePt_566363	YES	1.55289e-15	93.2581	CU484424	CU484424 CUSHIONC_KZ0ACAC Theobroma cacao cDNA clone KZ0ACAC10YE24FM1, mRNA sequence.
ePt_503853	YES	1.52105e-15	93.2581	CV986729	Mdst6021d09.y2 Mdst Malus x domestica cDNA clone Mdst6021d09 5' similar to TR:Q9SVK2 Q9SVK2 PUTATIVE SERINE/THREONINE KINASE ;, mRNA sequence.
ePt_637576	YES	1.48186e-15	93.2581	HS076816	KYERRC001_09-F11-T3.ab1 Panax ginseng in vitro-cultured adventitious root cDNA library Panax ginseng cDNA, mRNA sequence.
ePt_643100	YES	1.38878e-15	93.2581	DY643021	PU3_plate26_C02 PU3 Prunus persica cDNA similar to expressed mRNA inferred from Contig2489 Prunus persica hypothetical domain/motif containing InterproScan IPR003388 : Reticulon, mRNA sequence.
ePt_564635	YES	1.36919e-15	93.2581	GW346017	CC_09_UAS298 Coffee drought stressed leaf cDNA library Coffea canephora cDNA similar to Vitis vinifera hypothetical protein, mRNA sequence.
ePt_599904	YES	1.24917e-15	93.2581	EX660293	JS1B808JG Salt stressed Fragaria vesca (strain Hawaii-4) cDNA library Fragaria vesca cDNA clone JS1B808, mRNA sequence.
ePt_641695	YES	1.23202e-15	93.2581	DT000206	Mdlr7001A10.g1 Apple_EST_Mdlr Malus x domestica cDNA similar to ref|NP_177414.1| haloacid dehalogenase-like hydrolase family [Arabidopsis thaliana] sp|Q9SGG3|ALA5_ARATH Potential phospholipid-transporting ATPase 5 (Aminophospholipid flippase 5) pir|G96751 hypothetical protein F28P22.11 [imported] - Arabidopsis, mRNA sequence.
ePt_569853	YES	1.15854e-15	93.2581	DY653996	PU4_plate50_H19 PU4 Prunus persica cDNA similar to similar to putative cationic amino acid transporter [Oryza sativa (japonica cultivar-group)], mRNA sequence.
ePt_641783	YES	1.1414e-15	93.2581	FR622103	FR622103 WZOAFSAA Fagus sylvatica cDNA clone WZ0AFSAA46YN24FM1, mRNA sequence.
ePt_600423	YES	1.1365e-15	93.2581	GW837450	Summer_Black_0847 Grape cv. Summer Black flower and fruit Vitis vinifera cDNA, mRNA sequence.
ePt_574447	YES	1.1316e-15	93.2581	CA994191	G1012 Pst1-G fragment Gossypium raimondii cDNA 5', mRNA sequence.
ePt_573541	YES	1.10956e-15	93.2581	FG163757	AGN_RNC014xb23r1.ab1 AGN_RNC Nicotiana tabacum cDNA 3', mRNA sequence.
ePt_572122	YES	1.03853e-15	93.2581	EH712282	CNML11894.b1_L22.ab1 CNM(LMS) spotted knapweed Centaurea maculosa cDNA clone CNML11894, mRNA sequence.
ePt_566631	YES	9.8219e-16	93.2581	EH712282	CNML11894.b1_L22.ab1 CNM(LMS) spotted knapweed Centaurea maculosa cDNA clone CNML11894, mRNA sequence.
ePt_641515	YES	9.8219e-16	93.2581	EY859359	CM30-C1-401-009-F08-CT.F Sweet lime leaf, infected with CiLV Citrus limettioides cDNA, mRNA sequence.
ePt_643529	YES	9.69943e-16	93.2581	GO248192	EgTS_6B4 Eucalyptus globulus C14 clone shoot apex under hydric stress Eucalyptus globulus cDNA, mRNA sequence.
ePt_571936	YES	9.65899e-16	95.0615	EY726691	CS00-C3-703-069-A02-CT.F Sweet orange fruit, development stadium (4 of 6) Citrus sinensis cDNA, mRNA sequence.
ePt_567777	YES	9.65045e-16	93.2581	FK008581	GLME414TR JCVI-SOY2 Glycine max cDNA 5', mRNA sequence.
ePt_564342	YES	9.62595e-16	93.2581	FK008581	GLME414TR JCVI-SOY2 Glycine max cDNA 5', mRNA sequence.
ePt_570166	YES	9.01362e-16	93.2581	HO827790	vsubiol_031505_74509.8_c2369 vsubiol_029137_74509.8 Dioscorea alata cDNA, mRNA sequence.
ePt_504285	YES	8.76868e-16	93.2581	DY670846	STRC295JX cold-stressed Fragaria vesca seedlings cDNA library Fragaria vesca cDNA clone STRC295, mRNA sequence.
ePt_600505	YES	8.54824e-16	93.2581	CU584277	CU584277 OVULEI_KZ0AAB Theobroma cacao cDNA clone KZ0AAB1YL18, mRNA sequence.
ePt_641466	YES	7.98489e-16	93.2581	FC899897	IC0AAA59BC06RM1 IVIA1 Citrus clementina cDNA clone IC0AAA59BC06, mRNA sequence.
ePt_565428	YES	7.81343e-16	93.2581	AM826120	AM826120 DL, diurnal library Nicotiana tabacum cDNA clone nt005171053, mRNA sequence.
ePt_569829	YES	7.62773e-16	95.0615	EY880142	LT33-C1-003-038-F03-CT.F Tahiti lime leaf, greenhouse plant Citrus latifolia cDNA, mRNA sequence.
ePt_505007	YES	7.544e-16	93.2581	FC902613	IC0AAA47AA01RM1 IVIA1 Citrus clementina cDNA clone IC0AAA47AA01, mRNA sequence.
ePt_503994	YES	7.14099e-16	93.2581	HO055504	Cp0486 Cuphea paucipetala PI 534875 embryo Cuphea paucipetala cDNA clone Cp0486, mRNA sequence.
ePt_563365	YES	6.74835e-16	93.2581	CV255851	WS0242.B21_D18 PTxD-ICC-N-A-14 Populus trichocarpa x Populus deltoides cDNA clone WS0242_D18 3', mRNA sequence.
ePt_572148	YES	6.67474e-16	93.2581	DY670846	STRC295JX cold-stressed Fragaria vesca seedlings cDNA library Fragaria vesca cDNA clone STRC295, mRNA sequence.
ePt_639148	YES	6.19184e-16	95.0615	EY842105	PT11-C9-005-047-D07-CT.F Poncirus trifoliata seed, field plant Citrus trifoliata cDNA, mRNA sequence.
ePt_503906	YES	5.98171e-16	95.0615	FG918869	UCRVU09_CCNT3145_g1 Cowpea UCR 707 Mixed Tissue and Conditions cDNA Library UCRVU09-1-2 Vigna unguiculata cDNA clone CCNT3145.g1, mRNA sequence.
ePt_641483	YES	5.69453e-16	95.0615	ES792964	UFL_579_88 Cotton fiber 0-10 day post anthesis Gossypium hirsutum cDNA, mRNA sequence.
ePt_504256	YES	5.3163e-16	95.0615	CF446736	EST683081 normalized cDNA library of onion Allium cepa cDNA clone ACAIC45, mRNA sequence.
ePt_504301	YES	4.95908e-16	95.0615	GR142686	CCBX22030.b1 CCBX Mimulus guttatus IM62 floral buds (N) Mimulus guttatus cDNA clone CCBX22030 5', mRNA sequence.
ePt_638841	YES	4.69992e-16	95.0615	ES839014	UFL_049_61 Cotton fiber 0-10 day post anthesis Gossypium hirsutum cDNA, mRNA sequence.
ePt_567441	YES	4.60349e-16	95.0615	CB913507	VVD166H05_377071 An expressed sequence tag database for abiotic stressed berries of Vitis vinifera var. Chardonnay Vitis vinifera cDNA clone VVD166H05 5, mRNA sequence.
ePt_638674	YES	4.51928e-16	95.0615	HS271707	CCXA14107.b1 CCXA Euonymus alatus seed tissues collected from 8/14 to 9/19/2007 normalized Euonymus alatus cDNA clone CCXA14107 5', mRNA sequence.
ePt_572638	YES	4.51226e-16	95.0615	EY673857	CS00-C1-102-004-A05-CT.F Sweet orange leaf, infected with Xylella fastidiosa (stage 2 of 2) Citrus sinensis cDNA, mRNA sequence.
ePt_574037	YES	4.47015e-16	95.0615	CO121935	GR__Eb03F09.f GR__Eb Gossypium raimondii cDNA clone GR__Eb03F09 5', mRNA sequence.
ePt_502901	YES	4.46314e-16	95.0615	CO121935	GR__Eb03F09.f GR__Eb Gossypium raimondii cDNA clone GR__Eb03F09 5', mRNA sequence.
ePt_600066	YES	4.35086e-16	95.0615	HS076816	KYERRC001_09-F11-T3.ab1 Panax ginseng in vitro-cultured adventitious root cDNA library Panax ginseng cDNA, mRNA sequence.
ePt_638215	YES	4.30173e-16	95.0615	DY676124	STRBR65JX cold-stressed Fragaria vesca seedlings cDNA library Fragaria vesca cDNA clone STRBR65, mRNA sequence.
ePt_574064	YES	4.13331e-16	95.0615	GO526025	Mdwdb7506F05.g1 Apple_EST_Mdwdb Malus x domestica cDNA 5' similar to emb|CAD41131.1| OSJNBa0084K20.11 [Oryza sativa (japonica cultivar-group)], mRNA sequence.
ePt_570817	YES	4.04209e-16	95.0615	EY705867	CS00-C3-701-049-H01-CT.F Sweet orange fruit, development stadium (2 of 6) Citrus sinensis cDNA, mRNA sequence.
ePt_573479	YES	4.04209e-16	95.0615	EY705867	CS00-C3-701-049-H01-CT.F Sweet orange fruit, development stadium (2 of 6) Citrus sinensis cDNA, mRNA sequence.
ePt_574476	YES	4.02103e-16	95.0615	FR605675	FR605675 WZOAFSCA Fagus sylvatica cDNA clone WZ0AFSCA2YK24NM1, mRNA sequence.
ePt_569552	YES	4.007e-16	95.0615	HS076816	KYERRC001_09-F11-T3.ab1 Panax ginseng in vitro-cultured adventitious root cDNA library Panax ginseng cDNA, mRNA sequence.
ePt_572163	YES	3.97539e-16	93.2581	GO319058	019_J05 Lathyrus odoratus leaf Lathyrus odoratus cDNA, mRNA sequence.
ePt_565613	YES	3.83156e-16	95.0615	FG227720	cucurbitaSpp_005874 Cucurbita maxima (winter squash) phloem Cucurbita maxima cDNA, mRNA sequence.
ePt_637694	YES	3.7684e-16	95.0615	AW398234	EST298081 L. pennellii trichome, Cornell University Solanum pennellii cDNA clone cLPT2M15 5', mRNA sequence.
ePt_638702	YES	3.55086e-16	95.0615	DB885202	DB885202 full-length enriched poplar cDNA library, mixture of leaf, bud, stem, root Populus nigra cDNA clone PnFL2-059_C02 5', mRNA sequence.
ePt_640767	YES	3.55086e-16	95.0615	FN739088	FN739088 WZOAQRAI Quercus robur cDNA clone WZ0AQRAI1YK09FM1, mRNA sequence.
ePt_573200	YES	3.41051e-16	95.0615	CK861258	32320 In vitro Root Solanum tuberosum cDNA, mRNA sequence.
ePt_504818	YES	3.39648e-16	95.0615	EE071204	C3B02106 Clusters 4 cm (VvC3) Vitis vinifera cDNA clone C3B02106, mRNA sequence.
ePt_568084	YES	3.09472e-16	95.0615	ES593277	000001602552_M12.ab1 Eucalyptus globulus under low temperature Eucalyptus globulus cDNA, mRNA sequence.
ePt_574876	YES	3.08069e-16	95.0615	ES593277	000001602552_M12.ab1 Eucalyptus globulus under low temperature Eucalyptus globulus cDNA, mRNA sequence.
ePt_503532	YES	2.85191e-16	93.2581	CT987994	CT987994 Eucalyptus gunnii differentiating xylem AFOCEL clone 832 Eucalyptus gunnii cDNA, mRNA sequence.
ePt_504010	YES	2.69472e-16	95.0615	AM728025	AM728025 Cucumis melo subsp. agrestis pat81 root 15 days after pollination healthy Cucumis melo subsp. agrestis cDNA, mRNA sequence.
ePt_637997	YES	2.62455e-16	95.0615	DW485097	GH_RMIRS_051_A02_F Cotton Normalized Library random primed Gossypium hirsutum cDNA, mRNA sequence.
ePt_568457	YES	2.46315e-16	95.0615	CF511486	CAbud0002_IIIR_B04 Vitis vinifera cv. cabernet sauvignon (Clone 8) Bud - CABUD Vitis vinifera cDNA clone CAbud0002_IIIR_B04 3', mRNA sequence.
ePt_568368	YES	2.42806e-16	95.0615	FG227499	Cucurbita_Aug04_019252 Cucurbita maxima (winter squash) phloem Cucurbita maxima cDNA, mRNA sequence.
ePt_568499	YES	2.39999e-16	95.0615	FN700098	FN700098 WZOAQRAR Quercus robur cDNA clone WZ0AQRAR4YF10NM1, mRNA sequence.
ePt_638101	YES	2.39297e-16	95.0615	FD415465	1_SM-JB_L12-B01_T3__B01_3100406_03_ab1 CrUniGene leaf Catharanthus roseus cDNA similar to Hexokinase, mRNA sequence.
ePt_600706	YES	2.38595e-16	95.0615	FN700098	FN700098 WZOAQRAR Quercus robur cDNA clone WZ0AQRAR4YF10NM1, mRNA sequence.
ePt_564663	YES	2.31181e-16	96.8649	EY652385	CS00-C1-100-032-F10-CT.F Sweet orange leaf, greenhouse plant Citrus sinensis cDNA, mRNA sequence.
ePt_566444	YES	2.31103e-16	93.2581	ES592394	000001602252_M22.ab1 Eucalyptus globulus under low temperature Eucalyptus globulus cDNA, mRNA sequence.
ePt_568628	YES	2.2035e-16	95.0615	FR605675	FR605675 WZOAFSCA Fagus sylvatica cDNA clone WZ0AFSCA2YK24NM1, mRNA sequence.
ePt_503469	YES	2.06702e-16	95.0615	AV546241	AV546241 Arabidopsis thaliana roots Columbia Arabidopsis thaliana cDNA clone RZL10g12F 3', mRNA sequence.
ePt_568160	YES	1.98265e-16	95.0615	DY676124	STRBR65JX cold-stressed Fragaria vesca seedlings cDNA library Fragaria vesca cDNA clone STRBR65, mRNA sequence.
ePt_562846	YES	1.95453e-16	95.0615	CD717866	VVB143H03_407639 An expressed sequence tag database for abiotic stressed leaves of Vitis vinifera var. Chardonnay Vitis vinifera cDNA clone VVB143H03 5, mRNA sequence.
ePt_566807	YES	1.9475e-16	95.0615	CD717866	VVB143H03_407639 An expressed sequence tag database for abiotic stressed leaves of Vitis vinifera var. Chardonnay Vitis vinifera cDNA clone VVB143H03 5, mRNA sequence.
ePt_640419	YES	1.9475e-16	95.0615	CN604943	USDA_FP_132043 Vitis shuttleworthii L., grape Vitis shuttleworthii cDNA clone WHVs018_G11 5', mRNA sequence.
ePt_563466	YES	1.88422e-16	95.0615	DV152278	CV03088B1B03.f1 CV03-normalized library Euphorbia esula cDNA clone CV03088B1B03.f1 5, mRNA sequence.
ePt_637795	YES	1.63112e-16	95.0615	FN723922	FN723922 WZOAQPAC Quercus petraea cDNA clone WZ0AQPAI27YK12FM1, mRNA sequence.
ePt_643456	YES	1.54522e-16	96.8649	DT750510	EST1184359 Aquilegia cDNA library Aquilegia formosa x Aquilegia pubescens cDNA clone CO1WR01, mRNA sequence.
ePt_644103	YES	1.49505e-16	96.8649	CF810495	CA184F cDNA cold acclimated Bluecrop library Vaccinium corymbosum cDNA 5', mRNA sequence.
ePt_636912	YES	1.43485e-16	96.8649	FD688744	CBHY1819.fwd CBHY Mycosphaerella fijiensis MfEST5 Minimal medium without nitrogen (L) Mycosphaerella fijiensis cDNA clone CBHY1819 5', mRNA sequence.
ePt_564571	YES	1.40614e-16	95.0615	BQ105647	gg1207.e Rose Petals (Golden Gate) Lambda Zap Express Library Rosa hybrid cultivar cDNA clone gg1207.e 5', mRNA sequence.
ePt_572280	YES	1.40614e-16	95.0615	BQ105647	gg1207.e Rose Petals (Golden Gate) Lambda Zap Express Library Rosa hybrid cultivar cDNA clone gg1207.e 5', mRNA sequence.
ePt_636469	YES	1.38869e-16	96.8649	EX245260	PY04012X1F02.f1 PY04 Carica papaya cDNA, mRNA sequence.
ePt_573667	YES	1.32093e-16	96.8649	HO055902	Cp0884 Cuphea paucipetala PI 534875 embryo Cuphea paucipetala cDNA clone Cp0884, mRNA sequence.
ePt_567995	YES	1.28474e-16	96.8649	CT985952	CT985952 Eucalyptus gunnii differentiating xylem AFOCEL clone 832 Eucalyptus gunnii cDNA, mRNA sequence.
ePt_563799	YES	1.25056e-16	96.8649	HO787687	vsu-ars_012720_LI10Contig_21313 VSU-ARS-L10 Phaseolus acutifolius cDNA, mRNA sequence.
ePt_504616	YES	1.2385e-16	96.8649	AU303111	AU303111 zinnia cultured mesophyll cell equalized cDNA Zinnia violacea cDNA clone Z11828, mRNA sequence.
ePt_575244	YES	1.21638e-16	96.8649	EE070693	C3B04854 Clusters 4 cm (VvC3) Vitis vinifera cDNA clone C3B04854, mRNA sequence.
ePt_571315	YES	1.21437e-16	96.8649	CU405436	CU405436 LG0ABA Eucalyptus gunnii cDNA, mRNA sequence.
ePt_572812	YES	1.20432e-16	96.8649	EY698698	CS00-C3-700-074-G07-CT.F Sweet orange fruit, development stadium (1 of 6) Citrus sinensis cDNA, mRNA sequence.
ePt_503536	YES	1.18421e-16	96.8649	HO055902	Cp0884 Cuphea paucipetala PI 534875 embryo Cuphea paucipetala cDNA clone Cp0884, mRNA sequence.
ePt_574041	YES	1.13395e-16	96.8649	EB087265	EST49697 Larval Stage 1 Aedes aegypti cDNA clone AENR-LS1-166-B11-U.AB1 5', mRNA sequence.
ePt_573434	YES	1.13194e-16	96.8649	EB087265	EST49697 Larval Stage 1 Aedes aegypti cDNA clone AENR-LS1-166-B11-U.AB1 5', mRNA sequence.
ePt_640800	YES	1.13194e-16	96.8649	EB087265	EST49697 Larval Stage 1 Aedes aegypti cDNA clone AENR-LS1-166-B11-U.AB1 5', mRNA sequence.
ePt_570653	YES	1.12993e-16	96.8649	EB087265	EST49697 Larval Stage 1 Aedes aegypti cDNA clone AENR-LS1-166-B11-U.AB1 5', mRNA sequence.
ePt_571427	YES	1.09575e-16	96.8649	ES594893	000001603252_B01.ab1 Eucalyptus globulus under low temperature Eucalyptus globulus cDNA, mRNA sequence.
ePt_575504	YES	1.0857e-16	96.8649	CT983368	CT983368 Eucalyptus gunnii differentiating xylem AFOCEL clone 832 Eucalyptus gunnii cDNA, mRNA sequence.
ePt_565115	YES	1.07564e-16	96.8649	CT983368	CT983368 Eucalyptus gunnii differentiating xylem AFOCEL clone 832 Eucalyptus gunnii cDNA, mRNA sequence.
ePt_641554	YES	1.05956e-16	96.8649	DV938915	CSECS185E10_INFu0031 CabSau Immature Inflorescence Stage 31 (INFu0031) Vitis vinifera cDNA clone CSECS185E10 3', mRNA sequence.
ePt_641057	YES	1.02337e-16	96.8649	HO047969	CVSOVPREAN146 Library from pre anthesis stages of ovules of polyembryonic Citrus sinensis Citrus sinensis cDNA, mRNA sequence.
ePt_504521	YES	1.01533e-16	96.8649	HO826116	vsubiol_029831_74509.8_c695 vsubiol_029137_74509.8 Dioscorea alata cDNA, mRNA sequence.
ePt_640615	YES	9.95223e-17	96.8649	FR600221	FR600221 WZOAFSCA Fagus sylvatica cDNA clone WZ0AFSCA19YM24FM1, mRNA sequence.
ePt_504234	YES	9.40938e-17	96.8649	GO544675	Mdfwb2097E02.g1 Apple_EST_Mdfwb Malus x domestica cDNA 5' similar to ref|NP_195022.1| expressed protein [Arabidopsis thaliana] pir|T05304 hypothetical protein F26P21.80 - Arabidopsis thaliana emb|CAA21205.1| putative protein [Arabidopsis thaliana] emb|CAB80013.1| putative protein [Arabidopsis thaliana], mRNA sequence.
ePt_574824	YES	9.40938e-17	96.8649	GO544675	Mdfwb2097E02.g1 Apple_EST_Mdfwb Malus x domestica cDNA 5' similar to ref|NP_195022.1| expressed protein [Arabidopsis thaliana] pir|T05304 hypothetical protein F26P21.80 - Arabidopsis thaliana emb|CAA21205.1| putative protein [Arabidopsis thaliana] emb|CAB80013.1| putative protein [Arabidopsis thaliana], mRNA sequence.
ePt_638367	YES	9.04748e-17	96.8649	EC922619	WIN017.C21_G13 Cab Sauv pericarp non-normalized (WIN01) Vitis vinifera cDNA clone WIN017_G13 3', mRNA sequence.
ePt_503675	YES	9.02737e-17	96.8649	EH712282	CNML11894.b1_L22.ab1 CNM(LMS) spotted knapweed Centaurea maculosa cDNA clone CNML11894, mRNA sequence.
ePt_569345	YES	9.01612e-17	95.0615	DT520748	WS02448.B21_G22 PTxD-ICC-N-A-14 Populus trichocarpa x Populus deltoides cDNA clone WS02448_G22 3', mRNA sequence.
ePt_566525	YES	8.98716e-17	96.8649	CN927340	000530AEPA003070HT (AEPA) Pinkie expanding leaf Malus x domestica cDNA clone AEPA003070, mRNA sequence.
ePt_571172	YES	8.766e-17	96.8649	FK008581	GLME414TR JCVI-SOY2 Glycine max cDNA 5', mRNA sequence.
ePt_567906	YES	8.24326e-17	96.8649	FK008581	GLME414TR JCVI-SOY2 Glycine max cDNA 5', mRNA sequence.
ePt_573117	YES	7.90146e-17	96.8649	DT513877	WS02423.B21_E02 PTxD-ICC-N-A-14 Populus trichocarpa x Populus deltoides cDNA clone WS02423_E02 3', mRNA sequence.
ePt_562851	YES	7.59988e-17	96.8649	CU405436	CU405436 LG0ABA Eucalyptus gunnii cDNA, mRNA sequence.
ePt_562985	YES	6.99672e-17	96.8649	DV152278	CV03088B1B03.f1 CV03-normalized library Euphorbia esula cDNA clone CV03088B1B03.f1 5, mRNA sequence.
ePt_638009	YES	6.38771e-17	98.6682	EE487937	SD2MrH7 YG/PR Prunus cerasus cDNA, mRNA sequence.
ePt_564812	YES	6.1925e-17	96.8649	FC902613	IC0AAA47AA01RM1 IVIA1 Citrus clementina cDNA clone IC0AAA47AA01, mRNA sequence.
ePt_568986	YES	6.1925e-17	96.8649	FC902613	IC0AAA47AA01RM1 IVIA1 Citrus clementina cDNA clone IC0AAA47AA01, mRNA sequence.
ePt_573566	YES	5.72068e-17	96.8649	GH201799	MAN-BAR-007_C09_T7_T01193 Suppression subtractive hybridization library EB Fragaria vesca cDNA, mRNA sequence.
ePt_639933	YES	5.69777e-17	98.6682	FR621364	FR621364 WZOAFSAA Fagus sylvatica cDNA clone WZ0AFSAA42YO17FM1, mRNA sequence.
ePt_567586	YES	5.54253e-17	98.6682	EC992982	WIN1147.C21_A19 Muscat Hamburg pre-veraison berry normalized (WIN11) Vitis vinifera cDNA clone WIN1147_A19 3', mRNA sequence.
ePt_566313	YES	5.19695e-17	96.8649	GO560056	Mdfrt3062G12_e10344.g1 Mdfrt Malus x domestica cDNA 5' similar to ref|NP_187413.1| hypothetical protein [Arabidopsis thaliana] gb|AAO22562.1| unknown protein [Arabidopsis thaliana], mRNA sequence.
ePt_504733	YES	5.16882e-17	98.6682	FR618231	FR618231 WZOAFSAA Fagus sylvatica cDNA clone WZ0AFSAA28YC15FM1, mRNA sequence.
ePt_573513	YES	4.95608e-17	98.6682	FR618231	FR618231 WZOAFSAA Fagus sylvatica cDNA clone WZ0AFSAA28YC15FM1, mRNA sequence.
ePt_571588	YES	4.27764e-17	98.6682	GO024068	LJMCN42TF JCVI-LJ2 Lotus japonicus cDNA 5', mRNA sequence.
ePt_565888	YES	4.15115e-17	98.6682	EY796117	CR05-C3-701-036-G05-CT.F Mandarin fruit, development stadium (2 of 3) Citrus reticulata cDNA, mRNA sequence.
ePt_569959	YES	4.09941e-17	98.6682	ES839014	UFL_049_61 Cotton fiber 0-10 day post anthesis Gossypium hirsutum cDNA, mRNA sequence.
ePt_573759	YES	4.09941e-17	98.6682	ES839014	UFL_049_61 Cotton fiber 0-10 day post anthesis Gossypium hirsutum cDNA, mRNA sequence.
ePt_600084	YES	4.09941e-17	98.6682	ES839014	UFL_049_61 Cotton fiber 0-10 day post anthesis Gossypium hirsutum cDNA, mRNA sequence.
ePt_639130	YES	4.03041e-17	98.6682	EW701443	EST01183 Hemp Uni-ZAP XR cDNA library Cannabis sativa cDNA clone P29nr048, mRNA sequence.
ePt_573023	YES	4.01891e-17	98.6682	EW701443	EST01183 Hemp Uni-ZAP XR cDNA library Cannabis sativa cDNA clone P29nr048, mRNA sequence.
ePt_643289	YES	4.01891e-17	98.6682	EW701443	EST01183 Hemp Uni-ZAP XR cDNA library Cannabis sativa cDNA clone P29nr048, mRNA sequence.
ePt_568078	YES	3.77877e-17	98.6682	ES839014	UFL_049_61 Cotton fiber 0-10 day post anthesis Gossypium hirsutum cDNA, mRNA sequence.
ePt_640484	YES	3.629e-17	98.6682	DB934479	DB934479 full-length enriched cassava cDNA library Manihot esculenta cDNA clone CAS01_040_N13 5', mRNA sequence.
ePt_505040	YES	3.62324e-17	98.6682	DB891421	DB891421 full-length enriched poplar cDNA library, mixture of leaf, bud, stem, root Populus nigra cDNA clone PnFL2-095_H22 5', mRNA sequence.
ePt_572028	YES	3.61748e-17	98.6682	DB934479	DB934479 full-length enriched cassava cDNA library Manihot esculenta cDNA clone CAS01_040_N13 5', mRNA sequence.
ePt_643956	YES	3.61172e-17	98.6682	GE489863	CCFS4364.b1_H11.ab1 CCF(STU) sunflower Helianthus annuus cDNA clone CCFS4364, mRNA sequence.
ePt_503694	YES	3.36392e-17	96.8649	FR613829	FR613829 WZOAFSCA Fagus sylvatica cDNA clone WZ0AFSCA8YD15NM1, mRNA sequence.
ePt_565290	YES	3.31219e-17	98.6682	DW346419	PP_LEc0008F02f Peach shoot Prunus persica cDNA clone PP_LEc0008F02f, mRNA sequence.
ePt_565675	YES	3.31219e-17	98.6682	DW346419	PP_LEc0008F02f Peach shoot Prunus persica cDNA clone PP_LEc0008F02f, mRNA sequence.
ePt_567938	YES	3.30067e-17	98.6682	EX687314	JS7CJ12JG Salt and heat stressed Fragaria vesca (strain Hawaii-4) cDNA library Fragaria vesca cDNA clone JS7CJ12, mRNA sequence.
ePt_642757	YES	3.2661e-17	98.6682	DY643021	PU3_plate26_C02 PU3 Prunus persica cDNA similar to expressed mRNA inferred from Contig2489 Prunus persica hypothetical domain/motif containing InterproScan IPR003388 : Reticulon, mRNA sequence.
ePt_565093	YES	3.19698e-17	98.6682	DV213261	0089P0182Z_H06_T7 Mimulus guttatus library 2 Mimulus guttatus cDNA clone 0089P0182Z_H06 5', mRNA sequence.
ePt_644498	YES	3.16242e-17	98.6682	ES591635	000001601952_H16.ab1 Eucalyptus globulus under low temperature Eucalyptus globulus cDNA, mRNA sequence.
ePt_642178	YES	3.11057e-17	98.6682	CN938562	010615AVBC003547HT (AVBC) Royal Gala young shoot Malus x domestica cDNA clone AVBC003547, mRNA sequence.
ePt_504847	YES	3.10481e-17	98.6682	ES594448	000001602952_L06.ab1 Eucalyptus globulus under low temperature Eucalyptus globulus cDNA, mRNA sequence.
ePt_563067	YES	3.08177e-17	98.6682	BQ140592	NF037H06PH1F1060 Phoma-infected Medicago truncatula cDNA clone NF037H06PH 5', mRNA sequence.
ePt_563230	YES	3.06449e-17	98.6682	BQ140592	NF037H06PH1F1060 Phoma-infected Medicago truncatula cDNA clone NF037H06PH 5', mRNA sequence.
ePt_639274	YES	3.06449e-17	98.6682	BQ140592	NF037H06PH1F1060 Phoma-infected Medicago truncatula cDNA clone NF037H06PH 5', mRNA sequence.
ePt_575405	YES	3.04145e-17	98.6682	DB885202	DB885202 full-length enriched poplar cDNA library, mixture of leaf, bud, stem, root Populus nigra cDNA clone PnFL2-059_C02 5', mRNA sequence.
ePt_567001	YES	2.9812e-17	96.8649	FG911927	UCRVU08_CCNS803_b1 Cowpea IT97K-461-4 Mixed Tissue and Conditions cDNA Library UCRVU08-1-2 Vigna unguiculata cDNA clone CCNS803.b1, mRNA sequence.
ePt_568130	YES	2.96105e-17	96.8649	FG911927	UCRVU08_CCNS803_b1 Cowpea IT97K-461-4 Mixed Tissue and Conditions cDNA Library UCRVU08-1-2 Vigna unguiculata cDNA clone CCNS803.b1, mRNA sequence.
ePt_637786	YES	2.93777e-17	98.6682	ES848791	UFL_660_96 Cotton fiber 0-10 day post anthesis Gossypium hirsutum cDNA, mRNA sequence.
ePt_639527	YES	2.93777e-17	98.6682	CK861258	32320 In vitro Root Solanum tuberosum cDNA, mRNA sequence.
ePt_637087	YES	2.92624e-17	98.6682	ES848791	UFL_660_96 Cotton fiber 0-10 day post anthesis Gossypium hirsutum cDNA, mRNA sequence.
ePt_571324	YES	2.92048e-17	98.6682	EL417510	CHCL6023.b1_M18.ab1 CHC(LMS) Texas blueweed Helianthus ciliaris cDNA clone CHCL6023, mRNA sequence.
ePt_575049	YES	2.91472e-17	98.6682	DB885202	DB885202 full-length enriched poplar cDNA library, mixture of leaf, bud, stem, root Populus nigra cDNA clone PnFL2-059_C02 5', mRNA sequence.
ePt_574515	YES	2.90896e-17	98.6682	DB885202	DB885202 full-length enriched poplar cDNA library, mixture of leaf, bud, stem, root Populus nigra cDNA clone PnFL2-059_C02 5', mRNA sequence.
ePt_504353	YES	2.85136e-17	98.6682	FP042101	FP042101 LG0AAC Quercus petraea cDNA clone LG0AAC7YJ06RM1 similar to TPC1_ORYSJ Two pore calcium channel protein 1 . - Oryza sativa subsp. japonica, mRNA sequence.
ePt_568944	YES	2.85136e-17	98.6682	FP042101	FP042101 LG0AAC Quercus petraea cDNA clone LG0AAC7YJ06RM1 similar to TPC1_ORYSJ Two pore calcium channel protein 1 . - Oryza sativa subsp. japonica, mRNA sequence.
ePt_600198	YES	2.8456e-17	98.6682	FP042101	FP042101 LG0AAC Quercus petraea cDNA clone LG0AAC7YJ06RM1 similar to TPC1_ORYSJ Two pore calcium channel protein 1 . - Oryza sativa subsp. japonica, mRNA sequence.
ePt_566370	YES	2.79952e-17	98.6682	CK861258	32320 In vitro Root Solanum tuberosum cDNA, mRNA sequence.
ePt_574324	YES	2.79952e-17	98.6682	CK861258	32320 In vitro Root Solanum tuberosum cDNA, mRNA sequence.
ePt_503958	YES	2.79376e-17	98.6682	CK861258	32320 In vitro Root Solanum tuberosum cDNA, mRNA sequence.
ePt_504603	YES	2.77648e-17	98.6682	FS457670	FS457670 full-length enriched Striga hermonthica cDNA library Striga hermonthica cDNA clone SHAA-aaa59h12 5', mRNA sequence.
ePt_639411	YES	2.77072e-17	98.6682	HS266403	CCXA11154.g1 CCXA Euonymus alatus seed tissues collected from 8/14 to 9/19/2007 normalized Euonymus alatus cDNA clone CCXA11154 3', mRNA sequence.
ePt_636495	YES	2.73615e-17	98.6682	CV099075	FAMU_USDA_FP_7098 Vitis shuttleworthii L., grape Vitis shuttleworthii cDNA clone WHVs035_G08 5', mRNA sequence.
ePt_503595	YES	2.57486e-17	98.6682	EE098006	S9B01101 Ripening Berries (VvS9) Vitis vinifera cDNA clone S9B01101, mRNA sequence.
ePt_571861	YES	2.55175e-17	100.472	FR618694	FR618694 WZOAFSAA Fagus sylvatica cDNA clone WZ0AFSAA30YD08FM1, mRNA sequence.
ePt_599214	YES	2.54606e-17	98.6682	CT987755	CT987755 Eucalyptus gunnii differentiating xylem AFOCEL clone 832 Eucalyptus gunnii cDNA, mRNA sequence.
ePt_563114	YES	2.50574e-17	98.6682	GR193911	CBPH2835.g1 CBPH Mimulus lewisii floral buds (H) Mimulus lewisii cDNA clone CBPH2835 3', mRNA sequence.
ePt_574907	YES	2.35021e-17	98.6682	FL482329	FS-PC-003_D2 SSH library of pathogen infected Fagus sylvatica roots 1 Fagus sylvatica cDNA clone FS-PC-003_D2 5' similar to gi|61162196 beta-D-galactosidase [Pyrus pyrifolia], mRNA sequence.
ePt_640412	YES	2.35021e-17	98.6682	FL482329	FS-PC-003_D2 SSH library of pathogen infected Fagus sylvatica roots 1 Fagus sylvatica cDNA clone FS-PC-003_D2 5' similar to gi|61162196 beta-D-galactosidase [Pyrus pyrifolia], mRNA sequence.
ePt_569233	YES	2.32141e-17	98.6682	FP068894	FP068894 LG0AAD Quercus robur cDNA clone LG0AAD23YI15RM1 similar to SPTC2_MOUSE Serine palmitoyltransferase 2 . - Mus musculus, mRNA sequence.
ePt_575037	YES	2.25805e-17	98.6682	FN700098	FN700098 WZOAQRAR Quercus robur cDNA clone WZ0AQRAR4YF10NM1, mRNA sequence.
ePt_504250	YES	2.22348e-17	98.6682	GW714071	TZYSP_1_E13_T3 Black walnut ESTs Juglans nigra cDNA, mRNA sequence.
ePt_571064	YES	2.0459e-17	100.472	CO985526	GM89024B2C02.r1 Gm-r1089 Glycine max cDNA clone Gm-r1089-8956 3, mRNA sequence.
ePt_503925	YES	2.03339e-17	98.6682	EV240179	VV_PEd0011c06.g1 Vitis vinifera cv. perlette LibD Vitis vinifera cDNA, mRNA sequence.
ePt_573981	YES	2.01611e-17	98.6682	CU584277	CU584277 OVULEI_KZ0AAB Theobroma cacao cDNA clone KZ0AAB1YL18, mRNA sequence.
ePt_637919	YES	1.96354e-17	100.472	DT554790	EST1065430 GH_TMO Gossypium hirsutum cDNA, mRNA sequence.
ePt_637344	YES	1.88941e-17	100.472	CB001153	VVB001G10_120576 An expressed sequence tag database for abiotic stressed leaves of Vitis vinifera var. Chardonnay Vitis vinifera cDNA clone VVB001G10 5, mRNA sequence.
ePt_566729	YES	1.87788e-17	100.472	CD004057	VVA026A07_391707 An expressed sequence tag database for abiotic stressed leaves of Vitis vinifera var. Chardonnay Vitis vinifera cDNA clone VVA026A07 3, mRNA sequence.
ePt_565627	YES	1.73711e-17	98.6682	GT024005	ERB01_13_01_O02_H03_009 Ribes nigrum Ben Hope pooled bud (SCRI_Rn_bud_cDNA) Ribes nigrum cDNA, mRNA sequence.
ePt_504458	YES	1.70248e-17	98.6682	CT981232	CT981232 Eucalyptus gunnii differentiating xylem AFOCEL clone 832 Eucalyptus gunnii cDNA, mRNA sequence.
ePt_639550	YES	1.69998e-17	100.472	AW736130	EST332126 KV3 Medicago truncatula cDNA clone pKV3-5P13, mRNA sequence.
ePt_563086	YES	1.69671e-17	98.6682	FC063292	sT7aVVM006J03008 VVM Vitis vinifera cDNA clone VVM006J03008 5' similar to emb_CAO46633.1 unnamed protein product [Vitis vinifera]. Expect = 1e-118, mRNA sequence.
ePt_567871	YES	1.5986e-17	98.6682	FS361610	FS361610 LjFL3 Lotus japonicus cDNA clone LjFL3-052-BF09.r0 3', mRNA sequence.
ePt_503978	YES	1.58129e-17	98.6682	ES590747	000001601652_K08.ab1 Eucalyptus globulus under low temperature Eucalyptus globulus cDNA, mRNA sequence.
ePt_566230	YES	1.41393e-17	98.6682	EE101022	S9B08615 Ripening Berries (VvS9) Vitis vinifera cDNA clone S9B08615, mRNA sequence.
ePt_565128	YES	1.40238e-17	98.6682	EE101022	S9B08615 Ripening Berries (VvS9) Vitis vinifera cDNA clone S9B08615, mRNA sequence.
ePt_503577	YES	1.35405e-17	100.472	FR601817	FR601817 WZOAFSCA Fagus sylvatica cDNA clone WZ0AFSCA22YN15FM1, mRNA sequence.
ePt_599678	YES	1.34252e-17	100.472	FN737347	FN737347 WZOAQPAC Quercus petraea cDNA clone WZ0AQPAC4YC17FM1, mRNA sequence.
ePt_503774	YES	1.31946e-17	100.472	CU404240	CU404240 LG0ABA Eucalyptus gunnii cDNA, mRNA sequence.
ePt_569164	YES	1.25357e-17	100.472	FR601817	FR601817 WZOAFSCA Fagus sylvatica cDNA clone WZ0AFSCA22YN15FM1, mRNA sequence.
ePt_643159	YES	1.24863e-17	100.472	HO805458	vsu-ars_030491_LI15contig_16737 VSU-ARS-L15 Phaseolus acutifolius cDNA, mRNA sequence.
ePt_638952	YES	1.22886e-17	100.472	EH727243	CNMM13680.b1_O12.ab1 CNM(LMS) spotted knapweed Centaurea maculosa cDNA clone CNMM13680, mRNA sequence.
ePt_599530	YES	1.2058e-17	100.472	FG900094	UCRVU08_CCNS16247_g1 Cowpea IT97K-461-4 Mixed Tissue and Conditions cDNA Library UCRVU08-1-2 Vigna unguiculata cDNA clone CCNS16247.g1, mRNA sequence.
ePt_574140	YES	1.17615e-17	100.472	CD669774	eep1c.pk001.b24 eep1c Eucalyptus grandis cDNA clone eep1c.pk001.b24 5' end, mRNA sequence.
ePt_503370	YES	1.1196e-17	98.6682	ES832247	UFL_415_84 Cotton fiber 0-10 day post anthesis Gossypium hirsutum cDNA, mRNA sequence.
ePt_640695	YES	1.08099e-17	100.472	CX658873	PO01023D07 Poplar SC cDNA library Populus alba x Populus tremula var. glandulosa cDNA clone PO01023D07 5', mRNA sequence.
ePt_567303	YES	1.06118e-17	100.472	CT986679	CT986679 Eucalyptus gunnii differentiating xylem AFOCEL clone 832 Eucalyptus gunnii cDNA, mRNA sequence.
ePt_641655	YES	1.05623e-17	100.472	CA994191	G1012 Pst1-G fragment Gossypium raimondii cDNA 5', mRNA sequence.
ePt_641755	YES	9.53908e-18	100.472	AJ806600	AJ806600 Antirrhinum majus whole plant Antirrhinum majus cDNA clone 018_6_04_g02, mRNA sequence.
ePt_570889	YES	9.27503e-18	100.472	DV695630	CGN-40551 Seed of Late Development Stage Coffea canephora cDNA clone cccs46w9j22 5', mRNA sequence.
ePt_639232	YES	9.09349e-18	100.472	CU398250	CU398250 LG0ABA Eucalyptus gunnii cDNA, mRNA sequence.
ePt_570493	YES	9.06048e-18	100.472	BI893476	sai66f10.y1 Gm-c1068 Glycine max cDNA clone GENOME SYSTEMS CLONE ID: Gm-c1068-3716 5' similar to TR:Q9ZPY3 Q9ZPY3 F13A10.9 PROTEIN. ;, mRNA sequence.
ePt_574339	YES	8.86244e-18	100.472	CD477592	eca01-7ms1-f02 Eca01 Eschscholzia californica cDNA clone eca01-7ms1-f02 5', mRNA sequence.
ePt_643368	YES	8.41684e-18	100.472	ES590750	000001601652_K11.ab1 Eucalyptus globulus under low temperature Eucalyptus globulus cDNA, mRNA sequence.
ePt_565966	YES	8.28481e-18	100.472	CD477592	eca01-7ms1-f02 Eca01 Eschscholzia californica cDNA clone eca01-7ms1-f02 5', mRNA sequence.
ePt_574179	YES	8.2353e-18	100.472	CD477592	eca01-7ms1-f02 Eca01 Eschscholzia californica cDNA clone eca01-7ms1-f02 5', mRNA sequence.
ePt_641928	YES	8.21879e-18	100.472	CK901237	aflp_206 MBra685 cassava stem pGMTEasy Manihot esculenta cDNA, mRNA sequence.
ePt_571699	YES	8.18579e-18	100.472	CU403123	CU403123 LG0ABA Eucalyptus gunnii cDNA, mRNA sequence.
ePt_564988	YES	8.16928e-18	100.472	DB926049	DB926049 full-length enriched cassava cDNA library Manihot esculenta cDNA clone CAS01_017_J21 5', mRNA sequence.
ePt_567837	YES	7.95474e-18	100.472	FN748918	FN748918 WZOAQRAP Quercus robur cDNA clone WZ0AQRAP15YL21FM1, mRNA sequence.
ePt_569024	YES	7.7897e-18	100.472	ES802795	UFL_560_23 Cotton fiber 0-10 day post anthesis Gossypium hirsutum cDNA, mRNA sequence.
ePt_503404	YES	7.37711e-18	100.472	CN927340	000530AEPA003070HT (AEPA) Pinkie expanding leaf Malus x domestica cDNA clone AEPA003070, mRNA sequence.
ePt_564556	YES	7.1696e-18	98.6682	CT987994	CT987994 Eucalyptus gunnii differentiating xylem AFOCEL clone 832 Eucalyptus gunnii cDNA, mRNA sequence.
ePt_571276	YES	7.16256e-18	100.472	FG469370	020217KAKA006127HT (KAKA) Dormant kiwifruit buds one day before hydrogen cyanamide treatment Actinidia deliciosa cDNA clone KAKAA00612, mRNA sequence.
ePt_564897	YES	6.91501e-18	100.472	ES802795	UFL_560_23 Cotton fiber 0-10 day post anthesis Gossypium hirsutum cDNA, mRNA sequence.
ePt_575067	YES	6.83249e-18	100.472	CJ766154	CJ766154 Ipomoea nil shoot 8-days old seedling Ipomoea nil cDNA clone jmsf3h08 3', mRNA sequence.
ePt_641567	YES	6.66746e-18	100.472	FD558928	RR4FD72TF RR4(PB) Raphanus raphanistrum subsp. landra cDNA 5', mRNA sequence.
ePt_639336	YES	6.07103e-18	98.6682	CO492372	G.h.fbr-sw01762 G.h.fbr-sw Gossypium hirsutum cDNA, mRNA sequence.
ePt_573594	YES	5.72412e-18	98.6682	CU536125	CU536125 TISCIVS_KZ0AAQ Theobroma cacao cDNA clone KZ0AAQ1YO14RM2, mRNA sequence.
ePt_641794	YES	5.6663e-18	98.6682	DW235075	GH_RTFR_30R_D10_InvR_14Sep04_074_F Root (free) - 7-10 weeks after planting Gossypium hirsutum cDNA, mRNA sequence.
ePt_575040	YES	5.46517e-18	102.275	FN737410	FN737410 WZOAQPAC Quercus petraea cDNA clone WZ0AQPAC10YC01FM1, mRNA sequence.
ePt_503058	YES	5.38017e-18	100.472	CT981263	CT981263 Eucalyptus gunnii differentiating xylem AFOCEL clone 832 Eucalyptus gunnii cDNA, mRNA sequence.
ePt_568565	YES	5.21504e-18	102.275	GR831114	CCCC5045.b1 CCCC Glycine max callus grown in dark condition Glycine max cDNA clone CCCC5045 5', mRNA sequence.
ePt_571328	YES	4.81156e-18	100.472	ES593277	000001602552_M12.ab1 Eucalyptus globulus under low temperature Eucalyptus globulus cDNA, mRNA sequence.
ePt_639594	YES	4.41473e-18	100.472	DV222227	VVI205F06_616116 CabSau Flower Stage 12 (FLOu0012) Vitis vinifera cDNA clone VVI205F06 5, mRNA sequence.
ePt_571000	YES	4.40329e-18	102.275	GE601659	CCPW9922.b1_D10.ab1 CCP(UWX) Globe Artichoke Cynara cardunculus var. scolymus cDNA clone CCPW9922, mRNA sequence.
ePt_503769	YES	4.16671e-18	100.472	BG238622	sab52d10.y1 Gm-c1043 Glycine max cDNA clone GENOME SYSTEMS CLONE ID: Gm-c1043-2875 5' similar to TR:Q9XHC5 Q9XHC5 PRECURSOR MONOFUNCTIONAL ASPARTOKINASE. ;, mRNA sequence.
ePt_643494	YES	4.14843e-18	102.275	HO778840	vsu-ars_003873_LI10Contig_7473 VSU-ARS-L10 Phaseolus acutifolius cDNA, mRNA sequence.
ePt_637718	YES	4.0179e-18	100.472	DC600846	DC600846 Castanopsis sieboldii inner bark cDNA library Castanopsis sieboldii cDNA clone Cc_TUM05_04G20 5', mRNA sequence.
ePt_637789	YES	4.0179e-18	100.472	DC600846	DC600846 Castanopsis sieboldii inner bark cDNA library Castanopsis sieboldii cDNA clone Cc_TUM05_04G20 5', mRNA sequence.
ePt_636915	YES	3.56322e-18	102.275	FR596188	FR596188 WZOAFSCA Fagus sylvatica cDNA clone WZ0AFSCA11YP23NM1, mRNA sequence.
ePt_568495	YES	3.50186e-18	102.275	GR835953	CCCC8195.b1 CCCC Glycine max callus grown in dark condition Glycine max cDNA clone CCCC8195 5', mRNA sequence.
ePt_641361	YES	3.33668e-18	102.275	FR615488	FR615488 WZOAFSAA Fagus sylvatica cDNA clone WZ0AFSAA14YD05FM1, mRNA sequence.
ePt_639100	YES	2.96468e-18	102.275	DV155620	CV03098B1B01.f1 CV03-normalized library Euphorbia esula cDNA clone CV03098B1B01.f1 5, mRNA sequence.
ePt_640631	YES	2.72826e-18	102.275	FN735563	FN735563 WZOAQPAC Quercus petraea cDNA clone WZ0AQPAI6YM03FM1, mRNA sequence.
ePt_637503	YES	2.6668e-18	102.275	ES591589	000001601952_F03.ab1 Eucalyptus globulus under low temperature Eucalyptus globulus cDNA, mRNA sequence.
ePt_562976	YES	2.56277e-18	102.275	DB891421	DB891421 full-length enriched poplar cDNA library, mixture of leaf, bud, stem, root Populus nigra cDNA clone PnFL2-095_H22 5', mRNA sequence.
ePt_641861	YES	2.51549e-18	102.275	BQ140592	NF037H06PH1F1060 Phoma-infected Medicago truncatula cDNA clone NF037H06PH 5', mRNA sequence.
ePt_638297	YES	2.46348e-18	102.275	HO047969	CVSOVPREAN146 Library from pre anthesis stages of ovules of polyembryonic Citrus sinensis Citrus sinensis cDNA, mRNA sequence.
ePt_565922	YES	2.43038e-18	102.275	HO047969	CVSOVPREAN146 Library from pre anthesis stages of ovules of polyembryonic Citrus sinensis Citrus sinensis cDNA, mRNA sequence.
ePt_504015	YES	2.36418e-18	102.275	FC931371	C34104D08EF PostHarvP1 Citrus clementina cDNA clone C34104D08, mRNA sequence.
ePt_503948	YES	2.34527e-18	102.275	FP042101	FP042101 LG0AAC Quercus petraea cDNA clone LG0AAC7YJ06RM1 similar to TPC1_ORYSJ Two pore calcium channel protein 1 . - Oryza sativa subsp. japonica, mRNA sequence.
ePt_563349	YES	2.28853e-18	102.275	DT730599	EST1164449 Aquilegia cDNA library Aquilegia formosa x Aquilegia pubescens cDNA clone CO1SZ30, mRNA sequence.
ePt_504312	YES	2.09466e-18	102.275	ES593277	000001602552_M12.ab1 Eucalyptus globulus under low temperature Eucalyptus globulus cDNA, mRNA sequence.
ePt_565047	YES	1.91499e-18	102.275	EH712282	CNML11894.b1_L22.ab1 CNM(LMS) spotted knapweed Centaurea maculosa cDNA clone CNML11894, mRNA sequence.
ePt_503455	YES	1.86297e-18	102.275	CK764559	eca01-13cs1-g02 Eca01 Eschscholzia californica cDNA clone eca01-13cs1-g02 5', mRNA sequence.
ePt_641550	YES	1.84879e-18	102.275	HS252980	CCXA3197.b1 CCXA Euonymus alatus seed tissues collected from 8/14 to 9/19/2007 normalized Euonymus alatus cDNA clone CCXA3197 5', mRNA sequence.
ePt_503425	YES	1.70221e-18	102.275	CT982071	CT982071 Eucalyptus gunnii differentiating xylem AFOCEL clone 832 Eucalyptus gunnii cDNA, mRNA sequence.
ePt_599549	YES	1.67384e-18	102.275	EX166625	G05_P-26_037 Cotton 1-14 day post anthesis Lambda Zap Express Library Gossypium hirsutum cDNA, mRNA sequence.
ePt_639998	YES	1.65965e-18	102.275	CU404932	CU404932 LG0ABA Eucalyptus gunnii cDNA, mRNA sequence.
ePt_568896	YES	1.59825e-18	104.078	EX257428	1437464_5_J14_055 PY06 Carica papaya cDNA, mRNA sequence.
ePt_599694	YES	1.52253e-18	102.275	DY654198	PU4_plate55_F23 PU4 Prunus persica cDNA similar to hypothetical domain/motif containing InterProScan IPR001202: WW/Rsp5/WWP , inferred: flowering time control protein / FCA gamma (FCA) (SP O04425) [Arabidopsis thaliana], mRNA sequence.
ePt_503346	YES	1.5178e-18	102.275	EV282985	GLNBM71TF JCVI-SOY3 Glycine max cDNA 5', mRNA sequence.
ePt_570990	YES	1.48943e-18	102.275	EG675433	RCRDA89TP Castor bean cDNA library from roots, 1.8 kb Ricinus communis cDNA clone RCRDA89, mRNA sequence.
ePt_568083	YES	1.44688e-18	102.275	CO113764	GR__Eb014E21.r GR__Eb Gossypium raimondii cDNA clone GR__Eb014E21 3', mRNA sequence.
ePt_569433	YES	1.44688e-18	102.275	EX166625	G05_P-26_037 Cotton 1-14 day post anthesis Lambda Zap Express Library Gossypium hirsutum cDNA, mRNA sequence.
ePt_573955	YES	1.4117e-18	102.275	CT981006	CT981006 Eucalyptus gunnii differentiating xylem AFOCEL clone 832 Eucalyptus gunnii cDNA, mRNA sequence.
ePt_641235	YES	1.4117e-18	102.275	FD491694	Ltu01b_80_B05_C012.g2 Liriodendron Flower Bud Library Liriodendron tulipifera cDNA clone 122LZI_D10 5', mRNA sequence.
ePt_505062	YES	1.40696e-18	102.275	DY654198	PU4_plate55_F23 PU4 Prunus persica cDNA similar to hypothetical domain/motif containing InterProScan IPR001202: WW/Rsp5/WWP , inferred: flowering time control protein / FCA gamma (FCA) (SP O04425) [Arabidopsis thaliana], mRNA sequence.
ePt_565390	YES	1.40696e-18	102.275	DY654198	PU4_plate55_F23 PU4 Prunus persica cDNA similar to hypothetical domain/motif containing InterProScan IPR001202: WW/Rsp5/WWP , inferred: flowering time control protein / FCA gamma (FCA) (SP O04425) [Arabidopsis thaliana], mRNA sequence.
ePt_574061	YES	1.40696e-18	102.275	DY654198	PU4_plate55_F23 PU4 Prunus persica cDNA similar to hypothetical domain/motif containing InterProScan IPR001202: WW/Rsp5/WWP , inferred: flowering time control protein / FCA gamma (FCA) (SP O04425) [Arabidopsis thaliana], mRNA sequence.
ePt_503252	YES	1.39748e-18	102.275	CU404932	CU404932 LG0ABA Eucalyptus gunnii cDNA, mRNA sequence.
ePt_573184	YES	1.26427e-18	104.078	DT515457	WS02427.B21_J20 PTxD-ICC-N-A-14 Populus trichocarpa x Populus deltoides cDNA clone WS02427_J20 3', mRNA sequence.
ePt_642854	YES	1.20748e-18	104.078	DT515457	WS02427.B21_J20 PTxD-ICC-N-A-14 Populus trichocarpa x Populus deltoides cDNA clone WS02427_J20 3', mRNA sequence.
ePt_642567	YES	1.17908e-18	104.078	FR621364	FR621364 WZOAFSAA Fagus sylvatica cDNA clone WZ0AFSAA42YO17FM1, mRNA sequence.
ePt_503558	YES	1.17773e-18	104.078	HO782506	vsu-ars_007539_LI10Contig_11574 VSU-ARS-L10 Phaseolus acutifolius cDNA, mRNA sequence.
ePt_564742	YES	1.07361e-18	104.078	AV546241	AV546241 Arabidopsis thaliana roots Columbia Arabidopsis thaliana cDNA clone RZL10g12F 3', mRNA sequence.
ePt_643537	YES	1.06956e-18	104.078	EV240273	VV_PEd0011g05.g1 Vitis vinifera cv. perlette LibD Vitis vinifera cDNA, mRNA sequence.
ePt_503882	YES	1.04387e-18	104.078	FR596188	FR596188 WZOAFSCA Fagus sylvatica cDNA clone WZ0AFSCA11YP23NM1, mRNA sequence.
ePt_564496	YES	1.02493e-18	104.078	EY756864	CS13-C1-001-014-E07-CT.F Sweet orange leaf, field plant B Citrus sinensis cDNA, mRNA sequence.
ePt_503288	YES	1.02088e-18	104.078	FR596188	FR596188 WZOAFSCA Fagus sylvatica cDNA clone WZ0AFSCA11YP23NM1, mRNA sequence.
ePt_642585	YES	1.02088e-18	104.078	FR596188	FR596188 WZOAFSCA Fagus sylvatica cDNA clone WZ0AFSCA11YP23NM1, mRNA sequence.
ePt_503502	YES	1.01953e-18	104.078	FR596188	FR596188 WZOAFSCA Fagus sylvatica cDNA clone WZ0AFSCA11YP23NM1, mRNA sequence.
ePt_638585	YES	9.91131e-19	104.078	FG140486	AGN_ELP021xn07f1.ab1 AGN_ELP Nicotiana tabacum cDNA 5', mRNA sequence.
ePt_503677	YES	9.76257e-19	104.078	DY652584	PU4_plate20_H06 PU4 Prunus persica cDNA similar to weakly similar to nodulin MtN21 family protein [Arabidopsis thaliana], mRNA sequence.
ePt_503663	YES	9.71133e-19	102.275	EB108777	000416AELA008513HT (AELA) Royal Gala young expanding leaf Malus x domestica cDNA clone AELA008513, mRNA sequence.
ePt_571155	YES	9.69497e-19	104.078	AV546241	AV546241 Arabidopsis thaliana roots Columbia Arabidopsis thaliana cDNA clone RZL10g12F 3', mRNA sequence.
ePt_565493	YES	9.58679e-19	104.078	GW866439	42B07 Flax fiber enriched Lambda ZapII Library Linum usitatissimum cDNA 3', mRNA sequence.
ePt_644424	YES	9.37972e-19	102.275	FG398462	020917KSFA006514HT (KSFA) A. deliciosa small fruit 13d post pollination Actinidia deliciosa cDNA clone KSFAA00651, mRNA sequence.
ePt_638894	YES	8.57524e-19	104.078	DY383836	CL__Ea0002L20.f CL__Ea Curcuma longa cDNA clone CL__Ea0002L20 5', mRNA sequence.
ePt_571166	YES	8.46686e-19	104.078	GT144192	METCO93TR JCVI-MT3 Medicago truncatula cDNA 3', mRNA sequence.
ePt_639124	YES	8.20947e-19	104.078	EX266769	1447233_5_A15_064 PY06 Carica papaya cDNA, mRNA sequence.
ePt_644436	YES	8.11464e-19	104.078	DT760046	EST1193895 Aquilegia cDNA library Aquilegia formosa x Aquilegia pubescens cDNA clone CO1YC39, mRNA sequence.
ePt_644182	YES	7.96563e-19	104.078	EX266769	1447233_5_A15_064 PY06 Carica papaya cDNA, mRNA sequence.
ePt_640050	YES	7.85725e-19	104.078	CT981263	CT981263 Eucalyptus gunnii differentiating xylem AFOCEL clone 832 Eucalyptus gunnii cDNA, mRNA sequence.
ePt_574543	YES	7.43729e-19	104.078	EL418625	CHCL7044.b1_H09.ab1 CHC(LMS) Texas blueweed Helianthus ciliaris cDNA clone CHCL7044, mRNA sequence.
ePt_503872	YES	7.4102e-19	104.078	CU403123	CU403123 LG0ABA Eucalyptus gunnii cDNA, mRNA sequence.
ePt_570841	YES	7.4102e-19	104.078	EY406993	pOP-EAP00856_EST_C_1_pBSK_SK EA (Oil Palm Embryoid) Elaeis guineensis cDNA clone pOP-EAP00856 5', mRNA sequence.
ePt_570789	YES	7.08507e-19	104.078	CT981263	CT981263 Eucalyptus gunnii differentiating xylem AFOCEL clone 832 Eucalyptus gunnii cDNA, mRNA sequence.
ePt_573149	YES	7.05798e-19	104.078	HO047969	CVSOVPREAN146 Library from pre anthesis stages of ovules of polyembryonic Citrus sinensis Citrus sinensis cDNA, mRNA sequence.
ePt_641325	YES	6.75994e-19	104.078	CU591903	CU591903 SEED34I_KZ0AAH Theobroma cacao cDNA clone KZ0AAH12YJ08FM1, mRNA sequence.
ePt_641626	YES	6.7193e-19	104.078	AM736512	AM736512 Cucumis melo subsp. melo Piel de Sapo T-111 fruit 15 days after pollination Cucumis melo subsp. melo cDNA, mRNA sequence.
ePt_637522	YES	6.5161e-19	104.078	EY797331	CR05-C3-701-051-C10-CT.F Mandarin fruit, development stadium (2 of 3) Citrus reticulata cDNA, mRNA sequence.
ePt_571722	YES	6.35353e-19	104.078	HO790633	vsu-ars_015666_LI10Contig_15481 VSU-ARS-L10 Phaseolus acutifolius cDNA, mRNA sequence.
ePt_599486	YES	6.00131e-19	104.078	HO790633	vsu-ars_015666_LI10Contig_15481 VSU-ARS-L10 Phaseolus acutifolius cDNA, mRNA sequence.
ePt_570091	YES	5.81166e-19	104.078	GO248009	EgTS_3G1 Eucalyptus globulus C14 clone shoot apex under hydric stress Eucalyptus globulus cDNA, mRNA sequence.
ePt_641448	YES	5.81166e-19	104.078	ES795061	UFL_577_10 Cotton fiber 0-10 day post anthesis Gossypium hirsutum cDNA, mRNA sequence.
ePt_572152	YES	5.44589e-19	104.078	DB954061	DB954061 full-length enriched cassava cDNA library Manihot esculenta cDNA clone CAS01_048_I15 3', mRNA sequence.
ePt_640586	YES	5.44589e-19	104.078	DB954061	DB954061 full-length enriched cassava cDNA library Manihot esculenta cDNA clone CAS01_048_I15 3', mRNA sequence.
ePt_566332	YES	5.40525e-19	104.078	DB954061	DB954061 full-length enriched cassava cDNA library Manihot esculenta cDNA clone CAS01_048_I15 3', mRNA sequence.
ePt_563389	YES	5.31042e-19	104.078	FN700098	FN700098 WZOAQRAR Quercus robur cDNA clone WZ0AQRAR4YF10NM1, mRNA sequence.
ePt_574578	YES	5.31042e-19	104.078	CA994191	G1012 Pst1-G fragment Gossypium raimondii cDNA 5', mRNA sequence.
ePt_638960	YES	5.29687e-19	104.078	EB681987	KP1B.111C19F.060116T7 KP1B Nicotiana tabacum cDNA clone KP1B.111C19, mRNA sequence.
ePt_567527	YES	5.14785e-19	104.078	GT979480	JGCCJG2032H03.b Jatropha curcas L. germinating seeds (mixed stages) Jatropha curcas cDNA clone JGCCJG2032H03 similar to cell cycle control protein-related, mRNA sequence.
ePt_564713	YES	5.08012e-19	104.078	FP050900	FP050900 LG0AAC Quercus petraea cDNA clone LG0AAC10YP14RM1, mRNA sequence.
ePt_600067	YES	4.63307e-19	104.078	FP050900	FP050900 LG0AAC Quercus petraea cDNA clone LG0AAC10YP14RM1, mRNA sequence.
ePt_575238	YES	4.50158e-19	105.882	FN737410	FN737410 WZOAQPAC Quercus petraea cDNA clone WZ0AQPAC10YC01FM1, mRNA sequence.
ePt_565215	YES	4.4705e-19	104.078	GT979480	JGCCJG2032H03.b Jatropha curcas L. germinating seeds (mixed stages) Jatropha curcas cDNA clone JGCCJG2032H03 similar to cell cycle control protein-related, mRNA sequence.
ePt_566877	YES	4.38922e-19	104.078	ES818057	UFL_209_65 Cotton fiber 0-10 day post anthesis Gossypium hirsutum cDNA, mRNA sequence.
ePt_503607	YES	4.25375e-19	104.078	CT981006	CT981006 Eucalyptus gunnii differentiating xylem AFOCEL clone 832 Eucalyptus gunnii cDNA, mRNA sequence.
ePt_639658	YES	4.21878e-19	105.882	ES596495	000001604352_E12.ab1 Eucalyptus globulus under low temperature Eucalyptus globulus cDNA, mRNA sequence.
ePt_503574	YES	4.15892e-19	104.078	CT981263	CT981263 Eucalyptus gunnii differentiating xylem AFOCEL clone 832 Eucalyptus gunnii cDNA, mRNA sequence.
ePt_563176	YES	3.80027e-19	104.078	CT981263	CT981263 Eucalyptus gunnii differentiating xylem AFOCEL clone 832 Eucalyptus gunnii cDNA, mRNA sequence.
ePt_563319	YES	3.80027e-19	104.078	CT981263	CT981263 Eucalyptus gunnii differentiating xylem AFOCEL clone 832 Eucalyptus gunnii cDNA, mRNA sequence.
ePt_639343	YES	3.80027e-19	104.078	CT981263	CT981263 Eucalyptus gunnii differentiating xylem AFOCEL clone 832 Eucalyptus gunnii cDNA, mRNA sequence.
ePt_575226	YES	3.58311e-19	104.078	CT981263	CT981263 Eucalyptus gunnii differentiating xylem AFOCEL clone 832 Eucalyptus gunnii cDNA, mRNA sequence.
ePt_641942	YES	3.58311e-19	104.078	CT981263	CT981263 Eucalyptus gunnii differentiating xylem AFOCEL clone 832 Eucalyptus gunnii cDNA, mRNA sequence.
ePt_640073	YES	3.54083e-19	105.882	GO248338	EgTS_8A6 Eucalyptus globulus C14 clone shoot apex under hydric stress Eucalyptus globulus cDNA, mRNA sequence.
ePt_564360	YES	3.37038e-19	105.882	FR596910	FR596910 WZOAFSCA Fagus sylvatica cDNA clone WZ0AFSCA13YJ19NM1, mRNA sequence.
ePt_638178	YES	3.28452e-19	104.078	CU397745	CU397745 LG0ABA Eucalyptus gunnii cDNA, mRNA sequence.
ePt_636791	YES	3.27095e-19	104.078	CA994191	G1012 Pst1-G fragment Gossypium raimondii cDNA 5', mRNA sequence.
ePt_566719	YES	3.09451e-19	104.078	GW952179	Dur25.seed.ADAA-aab56d01.b1 DUR25-seed Arachis duranensis cDNA 5', mRNA sequence.
ePt_574192	YES	3.05271e-19	105.882	DB944768	DB944768 full-length enriched cassava cDNA library Manihot esculenta cDNA clone CAS01_019_G16 3', mRNA sequence.
ePt_570536	YES	3.01307e-19	104.078	EE068254	C3B00423 Clusters 4 cm (VvC3) Vitis vinifera cDNA clone C3B00423, mRNA sequence.
ePt_599898	YES	3.01009e-19	105.882	ES589315	000001480352_B18.ab1 Eucalyptus globulus under low temperature Eucalyptus globulus cDNA, mRNA sequence.
ePt_503734	YES	2.90449e-19	104.078	EE072263	C4B00158 Berries veraison stage (VvC4) Vitis vinifera cDNA clone C4B00158, mRNA sequence.
ePt_505043	YES	2.85901e-19	105.882	ES589954	000001601152_B07.ab1 Eucalyptus globulus under low temperature Eucalyptus globulus cDNA, mRNA sequence.
ePt_564904	YES	2.80477e-19	105.882	BP958387	BP958387 Euphorbia tirucalli callus induced from stem Euphorbia tirucalli cDNA clone ETC117C04 5', mRNA sequence.
ePt_570756	YES	2.80477e-19	105.882	BP958387	BP958387 Euphorbia tirucalli callus induced from stem Euphorbia tirucalli cDNA clone ETC117C04 5', mRNA sequence.
ePt_641031	YES	2.80477e-19	105.882	BP958387	BP958387 Euphorbia tirucalli callus induced from stem Euphorbia tirucalli cDNA clone ETC117C04 5', mRNA sequence.
ePt_639002	YES	2.77765e-19	105.882	BP958387	BP958387 Euphorbia tirucalli callus induced from stem Euphorbia tirucalli cDNA clone ETC117C04 5', mRNA sequence.
ePt_566140	YES	2.53835e-19	105.882	DC897236	DC897236 SLG Citrus unshiu cDNA clone SLG0402 5', mRNA sequence.
ePt_571975	YES	2.4452e-19	105.882	EB110199	000429AFBC007801HT (AFBC) Royal Gala pre-opened floral bud Malus x domestica cDNA clone AFBC007801, mRNA sequence.
ePt_571834	YES	2.32488e-19	105.882	EY698698	CS00-C3-700-074-G07-CT.F Sweet orange fruit, development stadium (1 of 6) Citrus sinensis cDNA, mRNA sequence.
ePt_569468	YES	2.30936e-19	105.882	EY698698	CS00-C3-700-074-G07-CT.F Sweet orange fruit, development stadium (1 of 6) Citrus sinensis cDNA, mRNA sequence.
ePt_599901	YES	2.3016e-19	105.882	ES595808	000001603752_A06.ab1 Eucalyptus globulus under low temperature Eucalyptus globulus cDNA, mRNA sequence.
ePt_567192	YES	2.28995e-19	105.882	EH717973	CNML4566.b1_L14.ab1 CNM(LMS) spotted knapweed Centaurea maculosa cDNA clone CNML4566, mRNA sequence.
ePt_642388	YES	2.23561e-19	105.882	HO799437	vsu-ars_024470_LI15contig_6655 VSU-ARS-L15 Phaseolus acutifolius cDNA, mRNA sequence.
ePt_638280	YES	2.21233e-19	105.882	EH717973	CNML4566.b1_L14.ab1 CNM(LMS) spotted knapweed Centaurea maculosa cDNA clone CNML4566, mRNA sequence.
ePt_573922	YES	2.1774e-19	105.882	EY770730	CR05-C1-102-049-C05-CT.F Mandarin leaf, infected with Xylella fastidiosa (stage 1 of 2) Citrus reticulata cDNA, mRNA sequence.
ePt_637466	YES	2.1153e-19	105.882	CU403123	CU403123 LG0ABA Eucalyptus gunnii cDNA, mRNA sequence.
ePt_503236	YES	2.07648e-19	105.882	EH717973	CNML4566.b1_L14.ab1 CNM(LMS) spotted knapweed Centaurea maculosa cDNA clone CNML4566, mRNA sequence.
ePt_572663	YES	2.06872e-19	105.882	CT983368	CT983368 Eucalyptus gunnii differentiating xylem AFOCEL clone 832 Eucalyptus gunnii cDNA, mRNA sequence.
ePt_565688	YES	2.00274e-19	105.882	FR616459	FR616459 WZOAFSAA Fagus sylvatica cDNA clone WZ0AFSAA19YI22FM1, mRNA sequence.
ePt_636601	YES	1.99886e-19	105.882	EY814411	PT11-C1-900-052-C07-CT.F Poncirus trifoliata leaf, greenhouse plant Citrus trifoliata cDNA, mRNA sequence.
ePt_565463	YES	1.99498e-19	105.882	EG015911	SSBN001P24u SSBN Solanum tuberosum cDNA clone SSBN001P24, mRNA sequence.
ePt_639651	YES	1.94452e-19	105.882	CU403123	CU403123 LG0ABA Eucalyptus gunnii cDNA, mRNA sequence.
ePt_641538	YES	1.8242e-19	105.882	CT988061	CT988061 Eucalyptus gunnii differentiating xylem AFOCEL clone 832 Eucalyptus gunnii cDNA, mRNA sequence.
ePt_504147	YES	1.81256e-19	105.882	EY669786	CS00-C1-102-054-D07-CT.F Sweet orange leaf, infected with Xylella fastidiosa (stage 2 of 2) Citrus sinensis cDNA, mRNA sequence.
ePt_572185	YES	1.74657e-19	105.882	CU394738	CU394738 LG0ABA Eucalyptus gunnii cDNA, mRNA sequence.
ePt_638303	YES	1.60857e-19	107.685	EH759721	CNSL5884.b1_H07.ab1 CNS(LMS) yellow starthistle Centaurea solstitialis cDNA clone CNSL5884, mRNA sequence.
ePt_574737	YES	1.59132e-19	105.882	DT513877	WS02423.B21_E02 PTxD-ICC-N-A-14 Populus trichocarpa x Populus deltoides cDNA clone WS02423_E02 3', mRNA sequence.
ePt_641578	YES	1.56415e-19	105.882	CD861251	WP.009E06F010807 WP Pisum sativum cDNA clone WP009E06, mRNA sequence.
ePt_566229	YES	1.5331e-19	105.882	CD669372	eef1c.pk007.h16 eef1c Eucalyptus tereticornis cDNA clone eef1c.pk007.h16 5' end, mRNA sequence.
ePt_640925	YES	1.50982e-19	105.882	EY184501	CBTI9568.b1_P16.ab1:P Triphysaria pusilla root tip normalized cDNA library Triphysaria pusilla cDNA, mRNA sequence.
ePt_575704	YES	1.49041e-19	105.882	ES592394	000001602252_M22.ab1 Eucalyptus globulus under low temperature Eucalyptus globulus cDNA, mRNA sequence.
ePt_504538	YES	1.45936e-19	105.882	ES590310	000001601552_C19.ab1 Eucalyptus globulus under low temperature Eucalyptus globulus cDNA, mRNA sequence.
ePt_567694	YES	1.38185e-19	107.685	AJ803489	AJ803489 Antirrhinum majus whole plant Antirrhinum majus cDNA clone 018_5_07_a12, mRNA sequence.
ePt_572150	YES	1.36621e-19	105.882	FR618862	FR618862 WZOAFSAA Fagus sylvatica cDNA clone WZ0AFSAA31YA17FM1, mRNA sequence.
ePt_642469	YES	1.3468e-19	105.882	FR618862	FR618862 WZOAFSAA Fagus sylvatica cDNA clone WZ0AFSAA31YA17FM1, mRNA sequence.
ePt_638746	YES	1.23036e-19	105.882	GW337754	EgRL_354 Eucalyptus globulus C14 clone root apex under water stress Eucalyptus globulus cDNA, mRNA sequence.
ePt_566792	YES	1.2226e-19	105.882	EG675433	RCRDA89TP Castor bean cDNA library from roots, 1.8 kb Ricinus communis cDNA clone RCRDA89, mRNA sequence.
ePt_574278	YES	1.2226e-19	105.882	EG675433	RCRDA89TP Castor bean cDNA library from roots, 1.8 kb Ricinus communis cDNA clone RCRDA89, mRNA sequence.
ePt_503826	YES	1.19931e-19	105.882	ES595406	000001603352_K24.ab1 Eucalyptus globulus under low temperature Eucalyptus globulus cDNA, mRNA sequence.
ePt_564084	YES	1.19931e-19	105.882	DT730599	EST1164449 Aquilegia cDNA library Aquilegia formosa x Aquilegia pubescens cDNA clone CO1SZ30, mRNA sequence.
ePt_564876	YES	1.12768e-19	107.685	EY176991	CBTI5791.g1_M07.ab1:P Triphysaria pusilla root tip normalized cDNA library Triphysaria pusilla cDNA, mRNA sequence.
ePt_563278	YES	1.11769e-19	107.685	HO778840	vsu-ars_003873_LI10Contig_7473 VSU-ARS-L10 Phaseolus acutifolius cDNA, mRNA sequence.
ePt_639328	YES	1.10824e-19	105.882	DY962539	CLSM12827.b1_F15.ab1 CLS(LMS) lettuce sativa Lactuca sativa cDNA clone CLSM12827, mRNA sequence.
ePt_641619	YES	1.09657e-19	105.882	GO014947	LJGAK13TO JCVI-LJ1 Lotus japonicus cDNA 3', mRNA sequence.
ePt_570743	YES	9.4343e-20	107.685	FP028597	FP028597 LG0AAA Quercus robur cDNA clone LG0AAA19YB18RM1 similar to CYSK_CITLA Cysteine synthase -lyase) . - Citrullus lanatus, mRNA sequence.
ePt_565180	YES	9.41031e-20	105.882	CK240568	VRJ364 Vitis riparia endodormant bud - VRJ Vitis riparia cDNA clone VRJ364 3', mRNA sequence.
ePt_504986	YES	9.29365e-20	105.882	CD669802	eep1c.pk001.i10 eep1c Eucalyptus grandis cDNA clone eep1c.pk001.i10 5' end, mRNA sequence.
ePt_562746	YES	9.25476e-20	105.882	EE068254	C3B00423 Clusters 4 cm (VvC3) Vitis vinifera cDNA clone C3B00423, mRNA sequence.
ePt_562917	YES	9.25476e-20	105.882	EE068254	C3B00423 Clusters 4 cm (VvC3) Vitis vinifera cDNA clone C3B00423, mRNA sequence.
ePt_504160	YES	9.09922e-20	105.882	CU624704	CU624704 LEAVES_KZ0ABE Theobroma cacao cDNA clone KZ0ABE1YO05RM1, mRNA sequence.
ePt_567309	YES	8.43817e-20	105.882	HO790633	vsu-ars_015666_LI10Contig_15481 VSU-ARS-L10 Phaseolus acutifolius cDNA, mRNA sequence.
ePt_568517	YES	8.43817e-20	105.882	HO790633	vsu-ars_015666_LI10Contig_15481 VSU-ARS-L10 Phaseolus acutifolius cDNA, mRNA sequence.
ePt_640539	YES	8.36878e-20	107.685	EY057782	CATF10734.fwd CATF Artemisia annua, Tanzanian, from Sandeman Seeds, 1-2kb Artemisia annua cDNA clone CATF10734 5', mRNA sequence.
ePt_503235	YES	8.1246e-20	107.685	EH187233	EC02_d_1144 EC02 Eragrostis curvula cDNA, mRNA sequence.
ePt_599991	YES	7.96921e-20	107.685	AM288075	AM288075 Prunus persica fruit skin mature fruit Prunus persica cDNA clone Skin38H07, mRNA sequence.
ePt_574549	YES	7.52524e-20	107.685	GT673727	CA00-XX-LP1-008-C07-EB.F Coffea arabica LP1 Coffea arabica cDNA clone CA00-XX-LP1-008-C07-EB, mRNA sequence.
ePt_504362	YES	7.51414e-20	107.685	CV093568	FAMU_USDA_FP_1591 Vitis shuttleworthii L., grape Vitis shuttleworthii cDNA clone JLVs080_G09 5', mRNA sequence.
ePt_572241	YES	7.38095e-20	107.685	BG127837	EST473483 tomato shoot/meristem Solanum lycopersicum cDNA clone cTOF18C6 5' sequence, mRNA sequence.
ePt_643322	YES	7.38095e-20	107.685	BG127837	EST473483 tomato shoot/meristem Solanum lycopersicum cDNA clone cTOF18C6 5' sequence, mRNA sequence.
ePt_570641	YES	7.26139e-20	107.685	FG469710	020217KAKA006854HT (KAKA) Dormant kiwifruit buds one day before hydrogen cyanamide treatment Actinidia deliciosa cDNA clone KAKAA00685, mRNA sequence.
ePt_564874	YES	7.19467e-20	107.685	AJ780735	AJ780735 Populus euphratica leaf 3-6 months Populus euphratica cDNA clone P0000900011G08F1, mRNA sequence.
ePt_568050	YES	7.19467e-20	107.685	FG469710	020217KAKA006854HT (KAKA) Dormant kiwifruit buds one day before hydrogen cyanamide treatment Actinidia deliciosa cDNA clone KAKAA00685, mRNA sequence.
ePt_572079	YES	6.99451e-20	107.685	DB891421	DB891421 full-length enriched poplar cDNA library, mixture of leaf, bud, stem, root Populus nigra cDNA clone PnFL2-095_H22 5', mRNA sequence.
ePt_570112	YES	6.98339e-20	107.685	DB891421	DB891421 full-length enriched poplar cDNA library, mixture of leaf, bud, stem, root Populus nigra cDNA clone PnFL2-095_H22 5', mRNA sequence.
ePt_644455	YES	6.98339e-20	107.685	DB891421	DB891421 full-length enriched poplar cDNA library, mixture of leaf, bud, stem, root Populus nigra cDNA clone PnFL2-095_H22 5', mRNA sequence.
ePt_573355	YES	6.83882e-20	107.685	AU303111	AU303111 zinnia cultured mesophyll cell equalized cDNA Zinnia violacea cDNA clone Z11828, mRNA sequence.
ePt_640084	YES	6.64978e-20	107.685	AJ780735	AJ780735 Populus euphratica leaf 3-6 months Populus euphratica cDNA clone P0000900011G08F1, mRNA sequence.
ePt_502997	YES	6.5497e-20	107.685	ES593277	000001602552_M12.ab1 Eucalyptus globulus under low temperature Eucalyptus globulus cDNA, mRNA sequence.
ePt_573388	YES	6.5497e-20	107.685	GH162537	NAS_10_F05_2004-10-24_037.ab1 Nasturtium 22 days post-anthesis library Tropaeolum majus cDNA, mRNA sequence.
ePt_566372	YES	6.48298e-20	107.685	DB891421	DB891421 full-length enriched poplar cDNA library, mixture of leaf, bud, stem, root Populus nigra cDNA clone PnFL2-095_H22 5', mRNA sequence.
ePt_505064	YES	6.41626e-20	107.685	FN735563	FN735563 WZOAQPAC Quercus petraea cDNA clone WZ0AQPAI6YM03FM1, mRNA sequence.
ePt_641407	YES	6.34954e-20	107.685	FN735563	FN735563 WZOAQPAC Quercus petraea cDNA clone WZ0AQPAI6YM03FM1, mRNA sequence.
ePt_639246	YES	6.33842e-20	107.685	DV700853	CGN-46932 Seed of Late Development Stage Coffea canephora cDNA clone cccs46w16g19 5', mRNA sequence.
ePt_644141	YES	6.30506e-20	107.685	AM813551	AM813551 seedling library, SL Nicotiana tabacum cDNA clone nt002152018, mRNA sequence.
ePt_504006	YES	6.19386e-20	107.685	CI641056	CI641056 Oryza sativa (japonica cultivar-group) callus suspension-cultured cells treated with elicitor Oryza sativa Japonica Group cDNA clone J06B5053I04T3 5', mRNA sequence.
ePt_637430	YES	6.1049e-20	107.685	EX252739	PY05055X1C02.f1 PY05 Carica papaya cDNA, mRNA sequence.
ePt_504031	YES	6.00482e-20	107.685	HS078325	KYERRC001_26-B09-T3.ab1 Panax ginseng in vitro-cultured adventitious root cDNA library Panax ginseng cDNA, mRNA sequence.
ePt_637316	YES	5.79354e-20	107.685	EY681596	CS00-C1-650-023-G04-CT.F Sweet orange leaf, young greenhouse plant Citrus sinensis cDNA, mRNA sequence.
ePt_642210	YES	5.6045e-20	107.685	EY681596	CS00-C1-650-023-G04-CT.F Sweet orange leaf, young greenhouse plant Citrus sinensis cDNA, mRNA sequence.
ePt_641805	YES	5.50442e-20	107.685	AM736512	AM736512 Cucumis melo subsp. melo Piel de Sapo T-111 fruit 15 days after pollination Cucumis melo subsp. melo cDNA, mRNA sequence.
ePt_640790	YES	5.13746e-20	107.685	GW337715	EgRL_315 Eucalyptus globulus C14 clone root apex under water stress Eucalyptus globulus cDNA, mRNA sequence.
ePt_573307	YES	5.01514e-20	107.685	GW337715	EgRL_315 Eucalyptus globulus C14 clone root apex under water stress Eucalyptus globulus cDNA, mRNA sequence.
ePt_562884	YES	4.95954e-20	107.685	GO248009	EgTS_3G1 Eucalyptus globulus C14 clone shoot apex under hydric stress Eucalyptus globulus cDNA, mRNA sequence.
ePt_567220	YES	4.6593e-20	107.685	AJ627756	AJ627756 Eucalyptus gunnii differentiating xylem Eucalyptus gunnii cDNA clone RTAB DNA-09H01, mRNA sequence.
ePt_565454	YES	4.64818e-20	107.685	FC863894	PPN072H05-T7 PPN Prunus persica cDNA clone PPN072H05, mRNA sequence.
ePt_570544	YES	4.4925e-20	107.685	BG127837	EST473483 tomato shoot/meristem Solanum lycopersicum cDNA clone cTOF18C6 5' sequence, mRNA sequence.
ePt_570755	YES	4.4925e-20	107.685	BG127837	EST473483 tomato shoot/meristem Solanum lycopersicum cDNA clone cTOF18C6 5' sequence, mRNA sequence.
ePt_639947	YES	4.42578e-20	107.685	EY756114	CS13-C1-001-003-G06-CT.F Sweet orange leaf, field plant B Citrus sinensis cDNA, mRNA sequence.
ePt_638328	YES	4.40354e-20	107.685	CB979631	CAB70001_IIIaF_B07 Cabernet Sauvignon Berry Post-Veraison - CAB7 Vitis vinifera cDNA clone CAB70001_IIIaF_B07 5', mRNA sequence.
ePt_503688	YES	4.28122e-20	107.685	GT979480	JGCCJG2032H03.b Jatropha curcas L. germinating seeds (mixed stages) Jatropha curcas cDNA clone JGCCJG2032H03 similar to cell cycle control protein-related, mRNA sequence.
ePt_642041	YES	4.2145e-20	107.685	DT514428	WS02424.B21_M14 PTxD-ICC-N-A-14 Populus trichocarpa x Populus deltoides cDNA clone WS02424_M14 3', mRNA sequence.
ePt_641043	YES	4.06993e-20	107.685	CI042626	CI042626 Oryza sativa (japonica cultivar-group) callus Oryza sativa Japonica Group cDNA clone 011-M029R-F05 3', mRNA sequence.
ePt_504460	YES	4.00321e-20	107.685	CT982071	CT982071 Eucalyptus gunnii differentiating xylem AFOCEL clone 832 Eucalyptus gunnii cDNA, mRNA sequence.
ePt_575419	YES	4.00321e-20	107.685	CT982071	CT982071 Eucalyptus gunnii differentiating xylem AFOCEL clone 832 Eucalyptus gunnii cDNA, mRNA sequence.
ePt_565021	YES	3.82529e-20	107.685	CO492503	G.h.fbr-sw01893 G.h.fbr-sw Gossypium hirsutum cDNA, mRNA sequence.
ePt_643712	YES	3.73633e-20	107.685	GW337715	EgRL_315 Eucalyptus globulus C14 clone root apex under water stress Eucalyptus globulus cDNA, mRNA sequence.
ePt_570928	YES	3.42497e-20	107.685	GO248000	EgTS_3F4 Eucalyptus globulus C14 clone shoot apex under hydric stress Eucalyptus globulus cDNA, mRNA sequence.
ePt_644338	YES	3.20223e-20	109.488	FR604902	FR604902 WZOAFSCA Fagus sylvatica cDNA clone WZ0AFSCA29YD20FM1, mRNA sequence.
ePt_644287	YES	3.08457e-20	109.488	ES590088	000001601152_H08.ab1 Eucalyptus globulus under low temperature Eucalyptus globulus cDNA, mRNA sequence.
ePt_504185	YES	3.05261e-20	107.685	CX548671	gmrtDrNS01_24-A_M13R_D07_057.s0 Water stressed gmrtDrNS01 Glycine max cDNA 3', mRNA sequence.
ePt_565534	YES	2.85207e-20	107.685	GO247880	EgTS_2B1 Eucalyptus globulus C14 clone shoot apex under hydric stress Eucalyptus globulus cDNA, mRNA sequence.
ePt_638161	YES	2.74749e-20	109.488	EB812438	3763_L13 Botrytis cinerea expressed sequence tags Botryotinia fuckeliana cDNA 5', mRNA sequence.
ePt_642226	YES	2.68389e-20	109.488	FP054188	FP054188 LG0AAD Quercus robur cDNA clone LG0AAD4YF11RM1 similar to Non-intrinsic ABC protein 8 . - Arabidopsis thaliana, mRNA sequence.
ePt_565763	YES	2.53443e-20	109.488	GW688409	KumquatSL_FI6-E11.g Fortunella margarita adult leaf subtraction library Fortunella margarita cDNA, mRNA sequence.
ePt_566501	YES	2.48038e-20	109.488	CU528729	CU528729 WOODS_KZ0ACAA Theobroma cacao cDNA clone KZ0ACAA7YJ01FM1, mRNA sequence.
ePt_574044	YES	2.3818e-20	109.488	DN485147	M112H05.3pR Populus female catkins cDNA library Populus trichocarpa cDNA clone M112H05 3', mRNA sequence.
ePt_568757	YES	2.31502e-20	109.488	EH187233	EC02_d_1144 EC02 Eragrostis curvula cDNA, mRNA sequence.
ePt_642287	YES	2.23552e-20	109.488	EY756864	CS13-C1-001-014-E07-CT.F Sweet orange leaf, field plant B Citrus sinensis cDNA, mRNA sequence.
ePt_503767	YES	2.10514e-20	109.488	ES591131	000001601752_N09.ab1 Eucalyptus globulus under low temperature Eucalyptus globulus cDNA, mRNA sequence.
ePt_570117	YES	2.02945e-20	109.488	ES595074	000001603252_K01.ab1 Eucalyptus globulus under low temperature Eucalyptus globulus cDNA, mRNA sequence.
ePt_642306	YES	2.00715e-20	109.488	DY653053	PU4_plate25_L08 PU4 Prunus persica cDNA similar to similar to diacylglycerol kinase 1 / diglyceride kinase 1 / DGK 1 / DAG kinase 1 (DGK1) (SP Q39017) [Arabidopsis thaliana] contains InterProScan IPR001206: Diacylglycerol kinase, catalytic region, mRNA sequence.
ePt_568788	YES	1.98803e-20	109.488	GT144192	METCO93TR JCVI-MT3 Medicago truncatula cDNA 3', mRNA sequence.
ePt_503315	YES	1.89245e-20	109.488	ES592759	000001602352_P08.ab1 Eucalyptus globulus under low temperature Eucalyptus globulus cDNA, mRNA sequence.
ePt_572105	YES	1.87652e-20	109.488	GT144192	METCO93TR JCVI-MT3 Medicago truncatula cDNA 3', mRNA sequence.
ePt_641457	YES	1.87167e-20	107.685	AI166409	xylem.est.244 Poplar xylem Lambda ZAPII library Populus trichocarpa cDNA 5', mRNA sequence.
ePt_503200	YES	1.85741e-20	109.488	CU401999	CU401999 LG0ABA Eucalyptus gunnii cDNA, mRNA sequence.
ePt_564956	YES	1.75227e-20	109.488	AU292191	AU292191 zinnia cultured mesophyll cell equalized cDNA Zinnia violacea cDNA clone Z6921, mRNA sequence.
ePt_565532	YES	1.73634e-20	109.488	DC584205	DC584205 Diospyros kaki ovary and young fruit pre-flowering to post-flowering stages Diospyros kaki cDNA clone KA011_D04 5', mRNA sequence.
ePt_504162	YES	1.69811e-20	109.488	CT983368	CT983368 Eucalyptus gunnii differentiating xylem AFOCEL clone 832 Eucalyptus gunnii cDNA, mRNA sequence.
ePt_568767	YES	1.6312e-20	109.488	ES592868	000001602452_F04.ab1 Eucalyptus globulus under low temperature Eucalyptus globulus cDNA, mRNA sequence.
ePt_639577	YES	1.58023e-20	109.488	CU403123	CU403123 LG0ABA Eucalyptus gunnii cDNA, mRNA sequence.
ePt_567066	YES	1.57386e-20	109.488	FP050900	FP050900 LG0AAC Quercus petraea cDNA clone LG0AAC10YP14RM1, mRNA sequence.
ePt_637120	YES	1.52925e-20	109.488	HS266403	CCXA11154.g1 CCXA Euonymus alatus seed tissues collected from 8/14 to 9/19/2007 normalized Euonymus alatus cDNA clone CCXA11154 3', mRNA sequence.
ePt_573203	YES	1.52607e-20	109.488	FG163757	AGN_RNC014xb23r1.ab1 AGN_RNC Nicotiana tabacum cDNA 3', mRNA sequence.
ePt_638705	YES	1.51651e-20	109.488	CN524388	GQ015M14.T3_G12 GQ015 Populus trichocarpa x Populus deltoides cDNA clone GQ015M14_G12 5', mRNA sequence.
ePt_599643	YES	1.47509e-20	109.488	ES590162	000001601152_K19.ab1 Eucalyptus globulus under low temperature Eucalyptus globulus cDNA, mRNA sequence.
ePt_642333	YES	1.47509e-20	109.488	DT730599	EST1164449 Aquilegia cDNA library Aquilegia formosa x Aquilegia pubescens cDNA clone CO1SZ30, mRNA sequence.
ePt_504079	YES	1.44642e-20	109.488	CU473363	CU473363 CHERELS_KZ0AAC Theobroma cacao cDNA clone KZ0AAC6YB01FM1, mRNA sequence.
ePt_569550	YES	1.41137e-20	109.488	EE068254	C3B00423 Clusters 4 cm (VvC3) Vitis vinifera cDNA clone C3B00423, mRNA sequence.
ePt_636658	YES	1.41137e-20	109.488	EE068254	C3B00423 Clusters 4 cm (VvC3) Vitis vinifera cDNA clone C3B00423, mRNA sequence.
ePt_644447	YES	1.36677e-20	109.488	HO790633	vsu-ars_015666_LI10Contig_15481 VSU-ARS-L10 Phaseolus acutifolius cDNA, mRNA sequence.
ePt_503724	YES	1.2457e-20	109.488	FF404171	CT0263 Cistus creticus trichome library, Clontech Cistus creticus subsp. creticus cDNA clone CT0263_P4B03_708 5', mRNA sequence.
ePt_503870	YES	1.2457e-20	109.488	ES590750	000001601652_K11.ab1 Eucalyptus globulus under low temperature Eucalyptus globulus cDNA, mRNA sequence.
ePt_572057	YES	1.20747e-20	109.488	FR622681	FR622681 WZOAFSAA Fagus sylvatica cDNA clone WZ0AFSAA49YL15FM1, mRNA sequence.
ePt_568865	YES	1.1565e-20	109.488	FR622681	FR622681 WZOAFSAA Fagus sylvatica cDNA clone WZ0AFSAA49YL15FM1, mRNA sequence.
ePt_640937	YES	1.12782e-20	109.488	ES818057	UFL_209_65 Cotton fiber 0-10 day post anthesis Gossypium hirsutum cDNA, mRNA sequence.
ePt_562842	YES	1.08322e-20	109.488	EC953674	WIN0559.C21_H03 Cab Sauv flower, leaf and root normalized (WIN05) Vitis vinifera cDNA clone WIN0559_H03 3', mRNA sequence.
ePt_573263	YES	1.03862e-20	109.488	GE564263	CCHT2217.b1_B04.ab1 CCHT Niger Seed Guizotia abyssinica cDNA clone CCHT2217, mRNA sequence.
ePt_643463	YES	9.03788e-21	111.292	GO918873	CMLMEb0001N22f CMLMEb Castanea mollissima cDNA, mRNA sequence.
ePt_567707	YES	9.02876e-21	111.292	GO918873	CMLMEb0001N22f CMLMEb Castanea mollissima cDNA, mRNA sequence.
ePt_641546	YES	8.90546e-21	109.488	FR618752	FR618752 WZOAFSAA Fagus sylvatica cDNA clone WZ0AFSAA30YI01FM1, mRNA sequence.
ePt_638390	YES	7.86259e-21	111.292	EY848551	CA26-C1-002-078-H02-CT.F Sour orange leaf, field plant Citrus aurantium cDNA, mRNA sequence.
ePt_563589	YES	7.85348e-21	111.292	EY848551	CA26-C1-002-078-H02-CT.F Sour orange leaf, field plant Citrus aurantium cDNA, mRNA sequence.
ePt_637858	YES	7.65304e-21	111.292	FP024887	FP024887 LG0AAA Quercus robur cDNA clone LG0AAA9YD23RM1 similar to PplGI.3|TC71426 similar to UP|Q7XAS0_ARATH Division protein, mRNA sequence.
ePt_639441	YES	7.63482e-21	111.292	CV242001	WS02513.B21_N16 PT-MB-N-A-15 Populus trichocarpa cDNA clone WS02513_N16 3', mRNA sequence.
ePt_567631	YES	6.82396e-21	111.292	CK753872	atr02-9ms3-b11 Atr02 Amborella trichopoda cDNA clone atr02-9ms3-b11 5', mRNA sequence.
ePt_503283	YES	6.81485e-21	111.292	DK496241	DK496241 full-length kale cDNA library (capsules) Brassica oleracea var. acephala cDNA clone KALE-106G07 5', mRNA sequence.
ePt_643797	YES	6.65997e-21	111.292	CA264808	SCAGRT3046H01.g RT3 Saccharum hybrid cultivar SP80-3280 cDNA clone SCAGRT3046H01 5', mRNA sequence.
ePt_564439	YES	6.47775e-21	111.292	FC325318	P00461_C6-B8_M13-F_E12_088.ab1 Onu-Ua-pathc Ulmus americana cDNA, mRNA sequence.
ePt_569369	YES	6.4322e-21	111.292	FS358355	FS358355 LjFL3 Lotus japonicus cDNA clone LjFL3-042-BF04.r0 3', mRNA sequence.
ePt_503922	YES	6.31376e-21	111.292	EX676214	JS5AS05JG Draught stressed Fragaria vesca (strain Hawaii-4) cDNA library Fragaria vesca cDNA clone JS5AS05, mRNA sequence.
ePt_504476	YES	5.96051e-21	111.292	DT581618	she01-5ms3-e07 She01 Saruma henryi cDNA clone she01-5ms3-e07 5', mRNA sequence.
ePt_644292	YES	5.77738e-21	109.488	CX078470	UCRCS08_9C05_b Parent Washington Navel Orange Callus cDNA Library UCRCS08-2 Citrus sinensis cDNA clone UCRCS08-9C05-E9-1-5.b, mRNA sequence.
ePt_504341	YES	5.70493e-21	111.292	CF210517	CAB20006_IVa_Fa_A02 Cabernet Sauvignon Flower bloom - CAB2 Vitis vinifera cDNA clone CAB20006_IVa_Fa_A02 5', mRNA sequence.
ePt_572339	YES	5.60452e-21	111.292	FC931623	C34107C01EF PostHarvP1 Citrus clementina cDNA clone C34107C01, mRNA sequence.
ePt_643927	YES	5.34894e-21	111.292	CU550133	CU550133 EPIC23I_KZ0AAS Theobroma cacao cDNA clone KZ0AAS9YK08FM1, mRNA sequence.
ePt_565718	YES	5.24853e-21	111.292	EY794227	CR05-C3-701-016-F05-CT.F Mandarin fruit, development stadium (2 of 3) Citrus reticulata cDNA, mRNA sequence.
ePt_575246	YES	5.09336e-21	111.292	CU484763	CU484763 CUSHIONC_KZ0ACAC Theobroma cacao cDNA clone KZ0ACAC1YN13FM1, mRNA sequence.
ePt_600414	YES	5.06598e-21	111.292	CT980663	CT980663 Eucalyptus gunnii differentiating xylem AFOCEL clone 832 Eucalyptus gunnii cDNA, mRNA sequence.
ePt_566985	YES	4.98383e-21	111.292	GR845131	CCCC14215.b1 CCCC Glycine max callus grown in dark condition Glycine max cDNA clone CCCC14215 5', mRNA sequence.
ePt_503296	YES	4.80127e-21	111.292	CO102629	GR__Eb0030D04.r GR__Eb Gossypium raimondii cDNA clone GR__Eb0030D04 3', mRNA sequence.
ePt_503876	YES	4.59133e-21	111.292	CT982101	CT982101 Eucalyptus gunnii differentiating xylem AFOCEL clone 832 Eucalyptus gunnii cDNA, mRNA sequence.
ePt_574238	YES	4.45441e-21	111.292	EY814411	PT11-C1-900-052-C07-CT.F Poncirus trifoliata leaf, greenhouse plant Citrus trifoliata cDNA, mRNA sequence.
ePt_566300	YES	4.31749e-21	111.292	FG163757	AGN_RNC014xb23r1.ab1 AGN_RNC Nicotiana tabacum cDNA 3', mRNA sequence.
ePt_641013	YES	4.27185e-21	111.292	EY720253	CS00-C3-703-004-A11-CT.F Sweet orange fruit, development stadium (4 of 6) Citrus sinensis cDNA, mRNA sequence.
ePt_503834	YES	4.26272e-21	111.292	CT987051	CT987051 Eucalyptus gunnii differentiating xylem AFOCEL clone 832 Eucalyptus gunnii cDNA, mRNA sequence.
ePt_644022	YES	4.09331e-21	109.488	FC906240	IC0AAA31BH03RM1 IVIA1 Citrus clementina cDNA clone IC0AAA31BH03, mRNA sequence.
ePt_572876	YES	3.76069e-21	111.292	EY818038	PT11-C1-900-092-H08-CT.F Poncirus trifoliata leaf, greenhouse plant Citrus trifoliata cDNA, mRNA sequence.
ePt_568793	YES	3.55988e-21	111.292	CO983540	GM89019A1G07.r1 Gm-r1089 Glycine max cDNA clone Gm-r1089-7213 3, mRNA sequence.
ePt_644396	YES	3.31766e-21	113.095	HS077947	KYERRC001_22-B10-T3.ab1 Panax ginseng in vitro-cultured adventitious root cDNA library Panax ginseng cDNA, mRNA sequence.
ePt_573321	YES	3.25866e-21	111.292	ES799194	UFL_537_30 Cotton fiber 0-10 day post anthesis Gossypium hirsutum cDNA, mRNA sequence.
ePt_642708	YES	3.25866e-21	111.292	ES799194	UFL_537_30 Cotton fiber 0-10 day post anthesis Gossypium hirsutum cDNA, mRNA sequence.
ePt_600068	YES	3.19476e-21	111.292	ES592049	000001602152_L19.ab1 Eucalyptus globulus under low temperature Eucalyptus globulus cDNA, mRNA sequence.
ePt_575402	YES	2.99395e-21	111.292	ES592049	000001602152_L19.ab1 Eucalyptus globulus under low temperature Eucalyptus globulus cDNA, mRNA sequence.
ePt_571164	YES	2.82964e-21	111.292	EY792072	CR05-C3-700-138-C08-CT.F Mandarin fruit, development stadium (1 of 3) Citrus reticulata cDNA, mRNA sequence.
ePt_641795	YES	2.76575e-21	111.292	ES799194	UFL_537_30 Cotton fiber 0-10 day post anthesis Gossypium hirsutum cDNA, mRNA sequence.
ePt_642661	YES	2.57889e-21	111.292	CN941822	010919AVBC018021PG (AVBC) Royal Gala young shoot Malus x domestica cDNA clone AVBC018021, mRNA sequence.
ePt_637041	YES	2.5606e-21	111.292	CU621325	CU621325 STEMS_KZ0AAA Theobroma cacao cDNA clone KZ0AAA8YM14FM1, mRNA sequence.
ePt_599383	YES	2.49659e-21	111.292	ES589586	000001480352_O07.ab1 Eucalyptus globulus under low temperature Eucalyptus globulus cDNA, mRNA sequence.
ePt_570530	YES	2.44172e-21	111.292	CB304076	wsc0012_IIIaR_C05 Tulare pellicle library Juglans regia cDNA clone wsc0012_IIIaR_C05 3', mRNA sequence.
ePt_504836	YES	2.30487e-21	113.095	EE255600	RFAA868TH Castor bean cDNA library from flowers,800bp Ricinus communis cDNA clone RFAA868, mRNA sequence.
ePt_642492	YES	2.11171e-21	113.095	DT508960	WS02422.BR_G11 PTxD-ICC-N-A-14 Populus trichocarpa x Populus deltoides cDNA clone WS02422_G11 5', mRNA sequence.
ePt_564180	YES	2.09344e-21	113.095	FN752160	FN752160 WZOAQRAP Quercus robur cDNA clone WZ0AQRAP27YA20FM1, mRNA sequence.
ePt_636894	YES	2.06995e-21	113.095	FN020443	FN020443 Petunia axillaris subsp. axillaris pool of root and petal tissue Petunia axillaris subsp. axillaris cDNA clone drs31P0007N15_R.ab1 2007-08-10, mRNA sequence.
ePt_639073	YES	2.06212e-21	113.095	GW688409	KumquatSL_FI6-E11.g Fortunella margarita adult leaf subtraction library Fortunella margarita cDNA, mRNA sequence.
ePt_641647	YES	1.7515e-21	113.095	FG402122	010730KHFA004406HT (KHFA) A. arguta ripe fruit Actinidia arguta cDNA clone KHFAA00440, mRNA sequence.
ePt_503153	YES	1.72341e-21	113.095	FG922462	UCRVU09_CCNT5328_b1 Cowpea UCR 707 Mixed Tissue and Conditions cDNA Library UCRVU09-1-2 Vigna unguiculata cDNA clone CCNT5328.b1, mRNA sequence.
ePt_570464	YES	1.71556e-21	113.095	FR633430	FR633430 WZ0AQRAS Quercus robur cDNA clone WZ0AQRAS39YN22CM1, mRNA sequence.
ePt_641050	YES	1.64233e-21	113.095	EX291172	1579367_5_O05_017 PY06 Carica papaya cDNA, mRNA sequence.
ePt_564765	YES	1.63972e-21	113.095	CN930368	000322AFBC002555HT (AFBC) Royal Gala pre-opened floral bud Malus x domestica cDNA clone AFBC002555, mRNA sequence.
ePt_504134	YES	1.63449e-21	113.095	CF210517	CAB20006_IVa_Fa_A02 Cabernet Sauvignon Flower bloom - CAB2 Vitis vinifera cDNA clone CAB20006_IVa_Fa_A02 5', mRNA sequence.
ePt_640064	YES	1.42266e-21	113.095	DT513877	WS02423.B21_E02 PTxD-ICC-N-A-14 Populus trichocarpa x Populus deltoides cDNA clone WS02423_E02 3', mRNA sequence.
ePt_599556	YES	1.33636e-21	113.095	DT513877	WS02423.B21_E02 PTxD-ICC-N-A-14 Populus trichocarpa x Populus deltoides cDNA clone WS02423_E02 3', mRNA sequence.
ePt_571678	YES	1.32328e-21	113.095	CO121143	GR__Eb02D05.f GR__Eb Gossypium raimondii cDNA clone GR__Eb02D05 5', mRNA sequence.
ePt_567746	YES	1.32067e-21	113.095	CT982071	CT982071 Eucalyptus gunnii differentiating xylem AFOCEL clone 832 Eucalyptus gunnii cDNA, mRNA sequence.
ePt_641653	YES	1.31282e-21	113.095	CU475931	CU475931 COPHAS_KZ0AAL Theobroma cacao cDNA clone KZ0AAL11YM21FM1, mRNA sequence.
ePt_503634	YES	1.12976e-21	113.095	CK644222	si.01.I22.5 MCol1522 cassava lambda zap Manihot esculenta cDNA 5', mRNA sequence.
ePt_503803	YES	1.12976e-21	113.095	CK644222	si.01.I22.5 MCol1522 cassava lambda zap Manihot esculenta cDNA 5', mRNA sequence.
ePt_504505	YES	1.12976e-21	113.095	ES795061	UFL_577_10 Cotton fiber 0-10 day post anthesis Gossypium hirsutum cDNA, mRNA sequence.
ePt_567473	YES	1.10102e-21	114.899	FN717535	FN717535 WZOAQRAQ Quercus robur cDNA clone WZ0AQRAQ19YG09FM1, mRNA sequence.
ePt_575537	YES	1.0513e-21	113.095	GT979480	JGCCJG2032H03.b Jatropha curcas L. germinating seeds (mixed stages) Jatropha curcas cDNA clone JGCCJG2032H03 similar to cell cycle control protein-related, mRNA sequence.
ePt_571696	YES	1.04607e-21	113.095	CU403123	CU403123 LG0ABA Eucalyptus gunnii cDNA, mRNA sequence.
ePt_575082	YES	1.00162e-21	113.095	CU403123	CU403123 LG0ABA Eucalyptus gunnii cDNA, mRNA sequence.
ePt_643630	YES	9.65002e-22	113.095	ES592394	000001602252_M22.ab1 Eucalyptus globulus under low temperature Eucalyptus globulus cDNA, mRNA sequence.
ePt_600306	YES	8.02861e-22	113.095	EC949340	WIN0546.C21_F17 Cab Sauv flower, leaf and root normalized (WIN05) Vitis vinifera cDNA clone WIN0546_F17 3', mRNA sequence.
ePt_599981	YES	6.94324e-22	113.095	CT987651	CT987651 Eucalyptus gunnii differentiating xylem AFOCEL clone 832 Eucalyptus gunnii cDNA, mRNA sequence.
ePt_643565	YES	6.64845e-22	114.899	AJ822050	AJ822050 S4 Prunus persica cDNA clone S410K11, mRNA sequence.
ePt_568304	YES	6.34062e-22	113.095	CA994191	G1012 Pst1-G fragment Gossypium raimondii cDNA 5', mRNA sequence.
ePt_643503	YES	6.31191e-22	114.899	DV132984	CV03064B1G01.f1 CV03-normalized library Euphorbia esula cDNA clone CV03064B1G01.f1 5, mRNA sequence.
ePt_567686	YES	6.29695e-22	114.899	EY848551	CA26-C1-002-078-H02-CT.F Sour orange leaf, field plant Citrus aurantium cDNA, mRNA sequence.
ePt_643347	YES	6.28948e-22	114.899	EY848551	CA26-C1-002-078-H02-CT.F Sour orange leaf, field plant Citrus aurantium cDNA, mRNA sequence.
ePt_642427	YES	6.26201e-22	113.095	CD669802	eep1c.pk001.i10 eep1c Eucalyptus grandis cDNA clone eep1c.pk001.i10 5' end, mRNA sequence.
ePt_640303	YES	6.05241e-22	113.095	GT144192	METCO93TR JCVI-MT3 Medicago truncatula cDNA 3', mRNA sequence.
ePt_567793	YES	5.9679e-22	114.899	EL898239	CGF2002784_G05 WRN-02: Walnut root infected with Pratylenchus vulnus Juglans hindsii x Juglans regia cDNA clone WRN-02-5_I_G05 5', mRNA sequence.
ePt_641784	YES	5.9476e-22	113.095	FS451863	FS451863 full-length enriched Striga hermonthica cDNA library Striga hermonthica cDNA clone SHAA-aaf61f08 5', mRNA sequence.
ePt_575733	YES	5.73606e-22	114.899	FR612031	FR612031 WZOAFSCA Fagus sylvatica cDNA clone WZ0AFSCA4YF08NM1, mRNA sequence.
ePt_600456	YES	5.6538e-22	114.899	AJ822050	AJ822050 S4 Prunus persica cDNA clone S410K11, mRNA sequence.
ePt_504958	YES	5.59397e-22	114.899	CD011666	VVB006A04_392939 An expressed sequence tag database for abiotic stressed leaves of Vitis vinifera var. Chardonnay Vitis vinifera cDNA clone VVB006A04 3, mRNA sequence.
ePt_642705	YES	5.59397e-22	114.899	CD011666	VVB006A04_392939 An expressed sequence tag database for abiotic stressed leaves of Vitis vinifera var. Chardonnay Vitis vinifera cDNA clone VVB006A04 3, mRNA sequence.
ePt_569539	YES	5.47431e-22	114.899	CD011666	VVB006A04_392939 An expressed sequence tag database for abiotic stressed leaves of Vitis vinifera var. Chardonnay Vitis vinifera cDNA clone VVB006A04 3, mRNA sequence.
ePt_571191	YES	5.37709e-22	114.899	AM721472	AM721472 Cucumis melo subsp. melo Piel de Sapo Pinyonet torpedo root 46 days after pollination infected with M. cannonballus Cucumis melo subsp. melo cDNA, mRNA sequence.
ePt_575164	YES	5.30978e-22	114.899	GT970395	GJCCJC2007G01.b Jatropha curcas L. developing seeds (mixed stages) Jatropha curcas cDNA clone GJCCJC2007G01 similar to TMS membrane family protein / tumour differentially expressed (TDE) family protein, mRNA sequence.
ePt_504830	YES	4.85522e-22	114.899	GO248192	EgTS_6B4 Eucalyptus globulus C14 clone shoot apex under hydric stress Eucalyptus globulus cDNA, mRNA sequence.
ePt_643489	YES	4.75032e-22	114.899	EV523775	JB2_56_D04 Castor seed endosperm Ricinus communis cDNA 5', mRNA sequence.
ePt_600019	YES	4.58549e-22	114.899	CX182302	D11_45-51_07.ab1 leaf inoculated with Marssonia pathogen of Populus euramericana Populus x canadensis cDNA, mRNA sequence.
ePt_643094	YES	4.40175e-22	113.095	EW688265	QSB059 nine-year-old eucalypt xylem library Eucalyptus grandis cDNA, mRNA sequence.
ePt_570585	YES	4.37569e-22	114.899	CU401999	CU401999 LG0ABA Eucalyptus gunnii cDNA, mRNA sequence.
ePt_504455	YES	4.36071e-22	114.899	BQ410422	GA__Ed0030F08r Gossypium arboreum 7-10 dpa fiber library Gossypium arboreum cDNA clone GA__Ed0030F08r, mRNA sequence.
ePt_567487	YES	4.36071e-22	114.899	BQ410422	GA__Ed0030F08r Gossypium arboreum 7-10 dpa fiber library Gossypium arboreum cDNA clone GA__Ed0030F08r, mRNA sequence.
ePt_636901	YES	4.33823e-22	114.899	CV705228	UCRPT01_0006J01_r Poncirus trifoliata CTV-challenged cDNA library - AGI2 Citrus trifoliata cDNA clone PT_6Ea0006J01, mRNA sequence.
ePt_569212	YES	3.91115e-22	114.899	CO121143	GR__Eb02D05.f GR__Eb Gossypium raimondii cDNA clone GR__Eb02D05 5', mRNA sequence.
ePt_572199	YES	3.91115e-22	114.899	CO121143	GR__Eb02D05.f GR__Eb Gossypium raimondii cDNA clone GR__Eb02D05 5', mRNA sequence.
ePt_573965	YES	3.74631e-22	114.899	FL810302	CCGG11730.b1 CCGG Panicum virgatum late flowering buds + seed development (H) Panicum virgatum cDNA clone CCGG11730 5', mRNA sequence.
ePt_566181	YES	3.71634e-22	114.899	FG501875	030630KAWC017518HT (KAWC) Actinidia chinensis - active meristems Actinidia chinensis cDNA clone KAWCC01751, mRNA sequence.
ePt_575698	YES	3.61894e-22	114.899	GD943674	454GmaGlobSeed686323 Soybean Seeds Containing Globular-Stage Embryos Glycine max cDNA, mRNA sequence.
ePt_642557	YES	3.38667e-22	114.899	FL810302	CCGG11730.b1 CCGG Panicum virgatum late flowering buds + seed development (H) Panicum virgatum cDNA clone CCGG11730 5', mRNA sequence.
ePt_641605	YES	3.3492e-22	114.899	EE068254	C3B00423 Clusters 4 cm (VvC3) Vitis vinifera cDNA clone C3B00423, mRNA sequence.
ePt_566963	YES	2.95209e-22	114.899	HS077947	KYERRC001_22-B10-T3.ab1 Panax ginseng in vitro-cultured adventitious root cDNA library Panax ginseng cDNA, mRNA sequence.
ePt_563185	YES	2.8397e-22	114.899	GH203137	MAN-VES-009_D06_T7_T01270 Suppression subtractive hybridization library SD Fragaria vesca cDNA, mRNA sequence.
ePt_503998	YES	2.74259e-22	116.702	HS259566	CCXA7257.b1 CCXA Euonymus alatus seed tissues collected from 8/14 to 9/19/2007 normalized Euonymus alatus cDNA clone CCXA7257 5', mRNA sequence.
ePt_572557	YES	2.71233e-22	114.899	FR612436	FR612436 WZOAFSCA Fagus sylvatica cDNA clone WZ0AFSCA5YD15FM1, mRNA sequence.
ePt_599999	YES	2.71233e-22	114.899	FR612436	FR612436 WZOAFSCA Fagus sylvatica cDNA clone WZ0AFSCA5YD15FM1, mRNA sequence.
ePt_575373	YES	2.62242e-22	114.899	ES592049	000001602152_L19.ab1 Eucalyptus globulus under low temperature Eucalyptus globulus cDNA, mRNA sequence.
ePt_637729	YES	2.61493e-22	114.899	FN720298	FN720298 WZOAQRAQ Quercus robur cDNA clone WZ0AQRAQ15YB04FM1, mRNA sequence.
ePt_637788	YES	2.61493e-22	114.899	FR618862	FR618862 WZOAFSAA Fagus sylvatica cDNA clone WZ0AFSAA31YA17FM1, mRNA sequence.
ePt_599877	YES	2.60743e-22	114.899	ES592049	000001602152_L19.ab1 Eucalyptus globulus under low temperature Eucalyptus globulus cDNA, mRNA sequence.
ePt_641754	YES	2.47257e-22	114.899	BU883935	R003D11 Populus root cDNA library Populus tremula x Populus tremuloides cDNA 5 prime, mRNA sequence.
ePt_575287	YES	2.39764e-22	114.899	GD943674	454GmaGlobSeed686323 Soybean Seeds Containing Globular-Stage Embryos Glycine max cDNA, mRNA sequence.
ePt_641197	YES	2.3625e-22	113.095	CT980458	CT980458 Eucalyptus gunnii differentiating xylem AFOCEL clone 832 Eucalyptus gunnii cDNA, mRNA sequence.
ePt_570517	YES	2.11688e-22	114.899	DT465333	GH_CHX17C24.f GH_CHX Gossypium hirsutum cDNA clone GH_CHX17C24 5', mRNA sequence.
ePt_572759	YES	2.09436e-22	114.899	DT465333	GH_CHX17C24.f GH_CHX Gossypium hirsutum cDNA clone GH_CHX17C24 5', mRNA sequence.
ePt_566762	YES	2.0193e-22	114.899	CU401246	CU401246 LG0ABA Eucalyptus gunnii cDNA, mRNA sequence.
ePt_568774	YES	1.99909e-22	116.702	AJ778624	AJ778624 Populus euphratica cambium 3-6 months Populus euphratica cDNA clone P0000600003F12F1, mRNA sequence.
ePt_575393	YES	1.98927e-22	114.899	CD669802	eep1c.pk001.i10 eep1c Eucalyptus grandis cDNA clone eep1c.pk001.i10 5' end, mRNA sequence.
ePt_571902	YES	1.77908e-22	114.899	GO248192	EgTS_6B4 Eucalyptus globulus C14 clone shoot apex under hydric stress Eucalyptus globulus cDNA, mRNA sequence.
ePt_638223	YES	1.77197e-22	116.702	FP042863	FP042863 LG0AAC Quercus petraea cDNA clone LG0AAC5YF03RM1 similar to ACOX1_ARATH Peroxisomal acyl-coenzyme A oxidase 1 . - Arabidopsis thaliana, mRNA sequence.
ePt_568813	YES	1.74155e-22	114.899	FP028484	FP028484 LG0AAA Quercus robur cDNA clone LG0AAA19YG15RM1 similar to PplGI.3|TC81488 similar to UP|Q84Q59_ARATH At3g27610, mRNA sequence.
ePt_504388	YES	1.66912e-22	116.702	AM807145	AM807145 COL, cold overnight library Nicotiana tabacum cDNA clone nt006083095, mRNA sequence.
ePt_563151	YES	1.66698e-22	116.702	EG664931	RCLGQ52TP Castor bean cDNA library from leaves, 1.7 kb Ricinus communis cDNA clone RCLGQ52, mRNA sequence.
ePt_644328	YES	1.60056e-22	116.702	EY693075	CS00-C3-700-007-E05-CT.F Sweet orange fruit, development stadium (1 of 6) Citrus sinensis cDNA, mRNA sequence.
ePt_504356	YES	1.54913e-22	116.702	FP039625	FP039625 LG0AAB Quercus robur cDNA clone LG0AAB14YM11RM1 similar to PI3K_ARATH Phosphatidylinositol 3-kinase VPS34 . - Arabidopsis thaliana, mRNA sequence.
ePt_504859	YES	1.50842e-22	116.702	DT581618	she01-5ms3-e07 She01 Saruma henryi cDNA clone she01-5ms3-e07 5', mRNA sequence.
ePt_563203	YES	1.45486e-22	116.702	CA143181	SCQSRT2033D09.g RT2 Saccharum hybrid cultivar SP80-3280 cDNA clone SCQSRT2033D09 5', mRNA sequence.
ePt_641634	YES	1.24936e-22	116.702	CK087678	A017P58.3pR Hybrid aspen plasmid library Populus tremula x Populus tremuloides cDNA clone A017P58 3', mRNA sequence.
ePt_566289	YES	1.18067e-22	116.702	CU622120	CU622120 STEMS_KZ0AAA Theobroma cacao cDNA clone KZ0AAA15YP15FM1, mRNA sequence.
ePt_575571	YES	1.18067e-22	116.702	CU622120	CU622120 STEMS_KZ0AAA Theobroma cacao cDNA clone KZ0AAA15YP15FM1, mRNA sequence.
ePt_565340	YES	1.16994e-22	116.702	GO248006	EgTS_3G10 Eucalyptus globulus C14 clone shoot apex under hydric stress Eucalyptus globulus cDNA, mRNA sequence.
ePt_599390	YES	1.12271e-22	116.702	EX246401	PY04015X1B10.f1 PY04 Carica papaya cDNA, mRNA sequence.
ePt_504594	YES	1.0991e-22	116.702	EX246401	PY04015X1B10.f1 PY04 Carica papaya cDNA, mRNA sequence.
ePt_571455	YES	1.08836e-22	116.702	CO121143	GR__Eb02D05.f GR__Eb Gossypium raimondii cDNA clone GR__Eb02D05 5', mRNA sequence.
ePt_563807	YES	1.07978e-22	116.702	ES596812	000001604452_D10.ab1 Eucalyptus globulus under low temperature Eucalyptus globulus cDNA, mRNA sequence.
ePt_636983	YES	9.63856e-23	116.702	FN719258	FN719258 WZOAQRAQ Quercus robur cDNA clone WZ0AQRAQ16YH17FM1, mRNA sequence.
ePt_572108	YES	9.42389e-23	116.702	FR616256	FR616256 WZOAFSAA Fagus sylvatica cDNA clone WZ0AFSAA18YH08FM1, mRNA sequence.
ePt_566488	YES	8.35056e-23	116.702	CU403123	CU403123 LG0ABA Eucalyptus gunnii cDNA, mRNA sequence.
ePt_642546	YES	8.26469e-23	116.702	CF511486	CAbud0002_IIIR_B04 Vitis vinifera cv. cabernet sauvignon (Clone 8) Bud - CABUD Vitis vinifera cDNA clone CAbud0002_IIIR_B04 3', mRNA sequence.
ePt_564700	YES	8.22176e-23	116.702	CU403123	CU403123 LG0ABA Eucalyptus gunnii cDNA, mRNA sequence.
ePt_565814	YES	8.22176e-23	116.702	CU403123	CU403123 LG0ABA Eucalyptus gunnii cDNA, mRNA sequence.
ePt_568181	YES	8.22176e-23	116.702	CU403123	CU403123 LG0ABA Eucalyptus gunnii cDNA, mRNA sequence.
ePt_568630	YES	8.22176e-23	116.702	CU403123	CU403123 LG0ABA Eucalyptus gunnii cDNA, mRNA sequence.
ePt_563207	YES	7.85682e-23	116.702	DT515805	WS02429.B21.1_J06 PTxD-ICC-N-A-14 Populus trichocarpa x Populus deltoides cDNA clone WS02429_J06 3', mRNA sequence.
ePt_637739	YES	7.74949e-23	116.702	FG430896	010421KABA013375HT (KABA) A. deliciosa petal Actinidia deliciosa cDNA clone KABAA01337, mRNA sequence.
ePt_566557	YES	7.72802e-23	116.702	FR616256	FR616256 WZOAFSAA Fagus sylvatica cDNA clone WZ0AFSAA18YH08FM1, mRNA sequence.
ePt_641027	YES	7.68509e-23	116.702	FR616256	FR616256 WZOAFSAA Fagus sylvatica cDNA clone WZ0AFSAA18YH08FM1, mRNA sequence.
ePt_502958	YES	7.38455e-23	116.702	FR616256	FR616256 WZOAFSAA Fagus sylvatica cDNA clone WZ0AFSAA18YH08FM1, mRNA sequence.
ePt_571266	YES	7.21282e-23	116.702	FR616256	FR616256 WZOAFSAA Fagus sylvatica cDNA clone WZ0AFSAA18YH08FM1, mRNA sequence.
ePt_569562	YES	6.99815e-23	116.702	GO923707	CMSMEa0004P12f CMSMEa Castanea mollissima cDNA, mRNA sequence.
ePt_642040	YES	6.89082e-23	116.702	CO127301	GR__Eb11M20.f GR__Eb Gossypium raimondii cDNA clone GR__Eb11M20 5', mRNA sequence.
ePt_575150	YES	6.56236e-23	118.505	FS587002	FS587002 Acacia mangium developing secondary xylem and shoot normalized cDNA library Acacia mangium cDNA clone AM1010I24 5', mRNA sequence.
ePt_572981	YES	6.48295e-23	116.702	FN756045	FN756045 WZOAQRAP Quercus robur cDNA clone WZ0AQRAP11YM08FM1, mRNA sequence.
ePt_568675	YES	6.46149e-23	116.702	CN941822	010919AVBC018021PG (AVBC) Royal Gala young shoot Malus x domestica cDNA clone AVBC018021, mRNA sequence.
ePt_503950	YES	6.36607e-23	116.702	FC900328	IC0AAA39CC10RM1 IVIA1 Citrus clementina cDNA clone IC0AAA39CC10, mRNA sequence.
ePt_503974	YES	6.10799e-23	116.702	EE608737	CHWL4106.b1_C20.ab1 CHW(LMS) silverleaf sunflower Helianthus argophyllus cDNA clone CHWL4106, mRNA sequence.
ePt_503972	YES	6.06497e-23	116.702	EE608737	CHWL4106.b1_C20.ab1 CHW(LMS) silverleaf sunflower Helianthus argophyllus cDNA clone CHWL4106, mRNA sequence.
ePt_638564	YES	6.06497e-23	116.702	BI921685	EST541577 tomato callus Solanum lycopersicum cDNA clone cLEC74C10 5' end, mRNA sequence.
ePt_643878	YES	6.05898e-23	118.505	ES593607	000001602652_O12.ab1 Eucalyptus globulus under low temperature Eucalyptus globulus cDNA, mRNA sequence.
ePt_571761	YES	6.00045e-23	116.702	DT558611	EST1069251 GH_TMO Gossypium hirsutum cDNA, mRNA sequence.
ePt_643083	YES	5.69935e-23	116.702	FC883474	KN0AAQ12YO17RM1 IVIA1 Citrus clementina cDNA clone KN0AAQ12YO17, mRNA sequence.
ePt_644027	YES	5.64154e-23	118.505	FR616093	FR616093 WZOAFSAA Fagus sylvatica cDNA clone WZ0AFSAA17YH22FM1, mRNA sequence.
ePt_569357	YES	5.59857e-23	118.505	FR615574	FR615574 WZOAFSAA Fagus sylvatica cDNA clone WZ0AFSAA14YK18FM1, mRNA sequence.
ePt_638946	YES	5.57031e-23	116.702	ES807145	UFL_627_26 Cotton fiber 0-10 day post anthesis Gossypium hirsutum cDNA, mRNA sequence.
ePt_639155	YES	5.28549e-23	118.505	FR616093	FR616093 WZOAFSAA Fagus sylvatica cDNA clone WZ0AFSAA17YH22FM1, mRNA sequence.
ePt_568676	YES	4.88647e-23	118.505	FG532653	MERIP0011J08.B MeriP Pisum sativum Shoot apical meristem ESTs Pisum sativum cDNA clone MERIP0011J08.B, mRNA sequence.
ePt_571180	YES	4.78825e-23	118.505	GR167449	CBPF12347.g1 CBPF Mimulus guttatus IM62 roots, seedlings, fruits, callus (H) Mimulus guttatus cDNA clone CBPF12347 3', mRNA sequence.
ePt_565614	YES	4.70231e-23	118.505	FS409885	FS409885 normalized full-length tobacco cDNA library Nicotiana tabacum cDNA clone TBK02GR0025_3_F01 5', mRNA sequence.
ePt_639035	YES	4.68389e-23	118.505	FG890926	UCRVU08_CCNS11505_b1 Cowpea IT97K-461-4 Mixed Tissue and Conditions cDNA Library UCRVU08-1-2 Vigna unguiculata cDNA clone CCNS11505.b1, mRNA sequence.
ePt_570150	YES	4.59181e-23	118.505	CD011666	VVB006A04_392939 An expressed sequence tag database for abiotic stressed leaves of Vitis vinifera var. Chardonnay Vitis vinifera cDNA clone VVB006A04 3, mRNA sequence.
ePt_641299	YES	4.59181e-23	118.505	CD011666	VVB006A04_392939 An expressed sequence tag database for abiotic stressed leaves of Vitis vinifera var. Chardonnay Vitis vinifera cDNA clone VVB006A04 3, mRNA sequence.
ePt_574397	YES	4.51647e-23	116.702	CU401276	CU401276 LG0ABA Eucalyptus gunnii cDNA, mRNA sequence.
ePt_600659	YES	4.45062e-23	118.505	DW478666	GH_RMIRS_015_D09_R Cotton Normalized Library random primed Gossypium hirsutum cDNA, mRNA sequence.
ePt_599650	YES	4.39537e-23	118.505	GO513683	Mdfwf2089H01.g1 Apple_EST_Mdfwf Malus x domestica cDNA 5' similar to ref|NP_197702.1| zinc finger (C3HC4-type RING finger) protein family [Arabidopsis thaliana] dbj|BAB09828.1| gene_id:MYJ24.10 ref|NP_055178.1 similar to unknown protein [Arabidopsis thaliana], mRNA sequence.
ePt_563214	YES	4.35854e-23	118.505	FG890926	UCRVU08_CCNS11505_b1 Cowpea IT97K-461-4 Mixed Tissue and Conditions cDNA Library UCRVU08-1-2 Vigna unguiculata cDNA clone CCNS11505.b1, mRNA sequence.
ePt_641520	YES	4.34012e-23	118.505	GW910155	PVUSE4NG-RP-013_K05_2APR2009_021 PVUSE4NG Phaseolus vulgaris cDNA, mRNA sequence.
ePt_641777	YES	4.03461e-23	118.505	FG922462	UCRVU09_CCNT5328_b1 Cowpea UCR 707 Mixed Tissue and Conditions cDNA Library UCRVU09-1-2 Vigna unguiculata cDNA clone CCNT5328.b1, mRNA sequence.
ePt_644354	YES	4.00386e-23	118.505	DW056910	CLLX9474.b1_C18.ab1 CLL(XYZ) lettuce saligna Lactuca saligna cDNA clone CLLX9474, mRNA sequence.
ePt_638703	YES	3.8993e-23	118.505	FG922462	UCRVU09_CCNT5328_b1 Cowpea UCR 707 Mixed Tissue and Conditions cDNA Library UCRVU09-1-2 Vigna unguiculata cDNA clone CCNT5328.b1, mRNA sequence.
ePt_641774	YES	3.78245e-23	118.505	GW955978	Dur25.seed.ADAA-aac01g09.b1 DUR25-seed Arachis duranensis cDNA 5', mRNA sequence.
ePt_503757	YES	3.75785e-23	118.505	CU403189	CU403189 LG0ABA Eucalyptus gunnii cDNA, mRNA sequence.
ePt_641180	YES	3.69019e-23	118.505	FG922462	UCRVU09_CCNT5328_b1 Cowpea UCR 707 Mixed Tissue and Conditions cDNA Library UCRVU09-1-2 Vigna unguiculata cDNA clone CCNT5328.b1, mRNA sequence.
ePt_642619	YES	3.68404e-23	118.505	DW056910	CLLX9474.b1_C18.ab1 CLL(XYZ) lettuce saligna Lactuca saligna cDNA clone CLLX9474, mRNA sequence.
ePt_565188	YES	3.57334e-23	118.505	CK087678	A017P58.3pR Hybrid aspen plasmid library Populus tremula x Populus tremuloides cDNA clone A017P58 3', mRNA sequence.
ePt_504275	YES	3.34577e-23	118.505	FP059265	FP059265 LG0AAD Quercus robur cDNA clone LG0AAD39YL03RM1, mRNA sequence.
ePt_641650	YES	3.29657e-23	118.505	FG922462	UCRVU09_CCNT5328_b1 Cowpea UCR 707 Mixed Tissue and Conditions cDNA Library UCRVU09-1-2 Vigna unguiculata cDNA clone CCNT5328.b1, mRNA sequence.
ePt_566561	YES	3.19817e-23	118.505	CV712276	UCRCS08_0001C16_f Parent Washington Navel Orange Callus cDNA Library UCRCS08-1 Citrus sinensis cDNA clone CS_AEa0001C16, mRNA sequence.
ePt_568898	YES	3.19817e-23	118.505	CV712276	UCRCS08_0001C16_f Parent Washington Navel Orange Callus cDNA Library UCRCS08-1 Citrus sinensis cDNA clone CS_AEa0001C16, mRNA sequence.
ePt_642363	YES	3.11821e-23	118.505	EY830965	PT11-C2-300-070-A07-CT.F Poncirus trifoliata bark, greenhouse plant Citrus trifoliata cDNA, mRNA sequence.
ePt_563354	YES	3.05056e-23	118.505	GD132514	KS26031D05 KS26 Capsicum annuum cDNA, mRNA sequence.
ePt_571795	YES	2.91525e-23	118.505	FC910913	IC0AAA71AG06RM1 IVIA1 Citrus clementina cDNA clone IC0AAA71AG06, mRNA sequence.
ePt_643412	YES	2.84145e-23	118.505	EL932058	Centeaurea_plate-004_K14.trimmed.seq Centaurea normalized cDNA library Centaurea maculosa cDNA 5', mRNA sequence.
ePt_641214	YES	2.63849e-23	118.505	ES795061	UFL_577_10 Cotton fiber 0-10 day post anthesis Gossypium hirsutum cDNA, mRNA sequence.
ePt_599655	YES	2.54623e-23	118.505	FC911591	KN0AAQ10YF24RM1 IVIA1 Citrus clementina cDNA clone KN0AAQ10YF24, mRNA sequence.
ePt_569698	YES	2.50318e-23	118.505	EC771077	EST 7573 Guarana fruits cDNA library Paullinia cupana var. sorbilis cDNA, mRNA sequence.
ePt_565370	YES	2.49703e-23	118.505	CT982071	CT982071 Eucalyptus gunnii differentiating xylem AFOCEL clone 832 Eucalyptus gunnii cDNA, mRNA sequence.
ePt_572415	YES	2.44168e-23	118.505	EC771077	EST 7573 Guarana fruits cDNA library Paullinia cupana var. sorbilis cDNA, mRNA sequence.
ePt_637557	YES	2.21412e-23	118.505	CT982071	CT982071 Eucalyptus gunnii differentiating xylem AFOCEL clone 832 Eucalyptus gunnii cDNA, mRNA sequence.
ePt_643691	YES	2.20181e-23	118.505	FN708799	FN708799 WZOAQPAB Quercus petraea cDNA clone WZ0AQPAB12YP11FM1, mRNA sequence.
ePt_570826	YES	2.11571e-23	118.505	CO492503	G.h.fbr-sw01893 G.h.fbr-sw Gossypium hirsutum cDNA, mRNA sequence.
ePt_639698	YES	2.06036e-23	118.505	FP028484	FP028484 LG0AAA Quercus robur cDNA clone LG0AAA19YG15RM1 similar to PplGI.3|TC81488 similar to UP|Q84Q59_ARATH At3g27610, mRNA sequence.
ePt_563224	YES	1.59874e-23	120.309	ES596690	000001604352_N19.ab1 Eucalyptus globulus under low temperature Eucalyptus globulus cDNA, mRNA sequence.
ePt_637286	YES	1.58467e-23	120.309	AJ627864	AJ627864 Eucalyptus gunnii differentiating xylem Eucalyptus gunnii cDNA clone RTAB DNA-12G08, mRNA sequence.
ePt_570156	YES	1.43341e-23	120.309	EL898239	CGF2002784_G05 WRN-02: Walnut root infected with Pratylenchus vulnus Juglans hindsii x Juglans regia cDNA clone WRN-02-5_I_G05 5', mRNA sequence.
ePt_575564	YES	1.42955e-23	118.505	FP028484	FP028484 LG0AAA Quercus robur cDNA clone LG0AAA19YG15RM1 similar to PplGI.3|TC81488 similar to UP|Q84Q59_ARATH At3g27610, mRNA sequence.
ePt_639229	YES	1.3912e-23	120.309	FP054188	FP054188 LG0AAD Quercus robur cDNA clone LG0AAD4YF11RM1 similar to Non-intrinsic ABC protein 8 . - Arabidopsis thaliana, mRNA sequence.
ePt_575022	YES	1.37889e-23	120.309	FN752160	FN752160 WZOAQRAP Quercus robur cDNA clone WZ0AQRAP27YA20FM1, mRNA sequence.
ePt_504867	YES	1.35075e-23	120.309	FR612031	FR612031 WZOAFSCA Fagus sylvatica cDNA clone WZ0AFSCA4YF08NM1, mRNA sequence.
ePt_642834	YES	1.31733e-23	120.309	GO610344	NBREL2_JP_001_F06_13APR2004_038 NBREL2 Nicotiana benthamiana cDNA, mRNA sequence.
ePt_567369	YES	1.31558e-23	120.309	CK753872	atr02-9ms3-b11 Atr02 Amborella trichopoda cDNA clone atr02-9ms3-b11 5', mRNA sequence.
ePt_504044	YES	1.31248e-23	118.505	EY886041	LT33-C1-003-013-F08-CT.F Tahiti lime leaf, greenhouse plant Citrus latifolia cDNA, mRNA sequence.
ePt_564276	YES	1.20653e-23	120.309	EY859244	CM30-C1-401-008-B05-CT.F Sweet lime leaf, infected with CiLV Citrus limettioides cDNA, mRNA sequence.
ePt_638773	YES	1.20653e-23	120.309	EY859244	CM30-C1-401-008-B05-CT.F Sweet lime leaf, infected with CiLV Citrus limettioides cDNA, mRNA sequence.
ePt_503660	YES	1.15904e-23	120.309	FC325318	P00461_C6-B8_M13-F_E12_088.ab1 Onu-Ua-pathc Ulmus americana cDNA, mRNA sequence.
ePt_504251	YES	1.11717e-23	120.309	EY758357	CR05-C1-100-003-A12-CT.F Mandarin leaf, greenhouse plant Citrus reticulata cDNA, mRNA sequence.
ePt_570670	YES	1.10836e-23	120.309	EY782121	CR05-C1-103-086-C10-CT.F Mandarin leaf, infected with Xylella fastidiosa (stage 2 of 2) Citrus reticulata cDNA, mRNA sequence.
ePt_638661	YES	1.10836e-23	120.309	CT986266	CT986266 Eucalyptus gunnii differentiating xylem AFOCEL clone 832 Eucalyptus gunnii cDNA, mRNA sequence.
ePt_641717	YES	1.09955e-23	120.309	GT977557	JGCCJG2010A06.b Jatropha curcas L. germinating seeds (mixed stages) Jatropha curcas cDNA clone JGCCJG2010A06 similar to aconitate hydratase, cytoplasmic, putative / citrate hydro-lyase/aconitase, putative, mRNA sequence.
ePt_571871	YES	1.09065e-23	118.505	CT984840	CT984840 Eucalyptus gunnii differentiating xylem AFOCEL clone 832 Eucalyptus gunnii cDNA, mRNA sequence.
ePt_564761	YES	1.06431e-23	120.309	FN729380	FN729380 WZOAQPAC Quercus petraea cDNA clone WZ0AQPAC8YD20FM1, mRNA sequence.
ePt_641495	YES	1.04135e-23	118.505	CT984840	CT984840 Eucalyptus gunnii differentiating xylem AFOCEL clone 832 Eucalyptus gunnii cDNA, mRNA sequence.
ePt_503792	YES	1.02906e-23	120.309	EY758357	CR05-C1-100-003-A12-CT.F Mandarin leaf, greenhouse plant Citrus reticulata cDNA, mRNA sequence.
ePt_504259	YES	9.93822e-24	120.309	HO015265	ocpsga0_0086_C02.ab1 Soybean immature seed full-length-enriched cDNA library Glycine max cDNA, mRNA sequence.
ePt_599283	YES	9.48008e-24	120.309	ES803199	UFL_507_11 Cotton fiber 0-10 day post anthesis Gossypium hirsutum cDNA, mRNA sequence.
ePt_638205	YES	9.30387e-24	120.309	EL902045	CGF2003441_G07 WRO-02: Walnut root Juglans hindsii x Juglans regia cDNA clone WRO-02-5_IV_G07 5', mRNA sequence.
ePt_641688	YES	8.70476e-24	120.309	GO248265	EgTS_7B12 Eucalyptus globulus C14 clone shoot apex under hydric stress Eucalyptus globulus cDNA, mRNA sequence.
ePt_565757	YES	8.59903e-24	120.309	GW871615	Pm_3041 Fruits and flowers of Prunus mume cv. Xiyeqing Prunus mume cDNA, mRNA sequence.
ePt_639067	YES	8.36996e-24	120.309	FL810302	CCGG11730.b1 CCGG Panicum virgatum late flowering buds + seed development (H) Panicum virgatum cDNA clone CCGG11730 5', mRNA sequence.
ePt_644214	YES	7.71798e-24	120.309	GE632304	LINN_XX_112_I09_LINN112.CR_I09 R. communis developing seed Ricinus communis cDNA, mRNA sequence.
ePt_639564	YES	7.29508e-24	120.309	CJ766154	CJ766154 Ipomoea nil shoot 8-days old seedling Ipomoea nil cDNA clone jmsf3h08 3', mRNA sequence.
ePt_504261	YES	7.17173e-24	120.309	AW761593	sl69g02.y1 Gm-c1027 Glycine max cDNA clone GENOME SYSTEMS CLONE ID: Gm-c1027-6603 5' similar to TR:O24526 O24526 MRP-LIKE ABC TRANSPORTER ;, mRNA sequence.
ePt_572607	YES	7.13649e-24	120.309	DV465064	MTUNUL1.P34.E06 NUL Populus fremontii x Populus angustifolia cDNA, mRNA sequence.
ePt_566850	YES	6.96028e-24	120.309	CT985338	CT985338 Eucalyptus gunnii differentiating xylem AFOCEL clone 832 Eucalyptus gunnii cDNA, mRNA sequence.
ePt_600110	YES	6.555e-24	120.309	FN720298	FN720298 WZOAQRAQ Quercus robur cDNA clone WZ0AQRAQ15YB04FM1, mRNA sequence.
ePt_567857	YES	6.39641e-24	120.309	GE632304	LINN_XX_112_I09_LINN112.CR_I09 R. communis developing seed Ricinus communis cDNA, mRNA sequence.
ePt_637768	YES	6.39641e-24	120.309	CN524607	GQ015M17.T3_C07 GQ015 Populus trichocarpa x Populus deltoides cDNA clone GQ015M17_C07 5', mRNA sequence.
ePt_571221	YES	6.04399e-24	120.309	DV465064	MTUNUL1.P34.E06 NUL Populus fremontii x Populus angustifolia cDNA, mRNA sequence.
ePt_643113	YES	6.04399e-24	120.309	ES442248	TSH_EST00746 Theobroma cacao-Moniliophthora perniciosa incompatible interaction library Theobroma cacao cDNA clone RT-014D03 5' similar to DNA-directed DNA polymerase epsilon catalytic subunit, putative [Arabidopsis thaliana] gb|AAF18240.1| T23G18.11 [Arabidopsis thaliana] Length = 2271, mRNA sequence.
ePt_638008	YES	5.78479e-24	122.112	DV687845	CGN-29988 Leaf Coffea canephora cDNA clone cccl4m8 5', mRNA sequence.
ePt_643590	YES	5.76206e-24	120.309	ES442248	TSH_EST00746 Theobroma cacao-Moniliophthora perniciosa incompatible interaction library Theobroma cacao cDNA clone RT-014D03 5' similar to DNA-directed DNA polymerase epsilon catalytic subunit, putative [Arabidopsis thaliana] gb|AAF18240.1| T23G18.11 [Arabidopsis thaliana] Length = 2271, mRNA sequence.
ePt_641761	YES	5.40964e-24	120.309	CK093488	G121P83.3pR Populus tension wood cDNA library Populus tremula x Populus tremuloides cDNA clone G121P83 3', mRNA sequence.
ePt_640386	YES	5.19028e-24	120.309	DB906377	DB906377 full-length enriched poplar cDNA library, mixture of leaf, bud, stem, root Populus nigra cDNA clone PnFL2-076_O10 3', mRNA sequence.
ePt_574951	YES	4.97843e-24	120.309	CN941822	010919AVBC018021PG (AVBC) Royal Gala young shoot Malus x domestica cDNA clone AVBC018021, mRNA sequence.
ePt_640164	YES	4.97843e-24	120.309	CN941822	010919AVBC018021PG (AVBC) Royal Gala young shoot Malus x domestica cDNA clone AVBC018021, mRNA sequence.
ePt_566916	YES	4.132e-24	122.112	BQ515061	EST622476 Generation of a set of potato cDNA clones for microarray analyses mixed potato tissues Solanum tuberosum cDNA clone STMIP84 3' end, mRNA sequence.
ePt_636785	YES	4.09168e-24	122.112	FN753875	FN753875 WZOAQRAP Quercus robur cDNA clone WZ0AQRAP9YI22FM1, mRNA sequence.
ePt_638709	YES	4.05137e-24	122.112	EE088790	S6B03520 Fruits 7-9 mm (VvS6) Vitis vinifera cDNA clone S6B03520, mRNA sequence.
ePt_575156	YES	3.91919e-24	120.309	FG501875	030630KAWC017518HT (KAWC) Actinidia chinensis - active meristems Actinidia chinensis cDNA clone KAWCC01751, mRNA sequence.
ePt_574963	YES	3.79942e-24	122.112	EY727132	CS00-C3-703-099-C12-CT.F Sweet orange fruit, development stadium (4 of 6) Citrus sinensis cDNA, mRNA sequence.
ePt_643839	YES	3.79438e-24	122.112	AM807145	AM807145 COL, cold overnight library Nicotiana tabacum cDNA clone nt006083095, mRNA sequence.
ePt_574349	YES	3.74265e-24	120.309	CB240257	PopSC00235 Poplar SC cDNA library Populus alba x Populus tremula var. glandulosa cDNA clone PopSC00235, mRNA sequence.
ePt_575168	YES	3.70872e-24	122.112	GD079591	KS17044B07 KS17 Capsicum annuum cDNA, mRNA sequence.
ePt_638109	YES	3.53739e-24	122.112	CU615957	CU615957 TPFERMI_A_KZ0AAN Theobroma cacao cDNA clone KZ0AAN6YA23FM1, mRNA sequence.
ePt_564369	YES	3.50716e-24	122.112	FR625449	FR625449 WZ0AQRAS Quercus robur cDNA clone WZ0AQRAS13YI22CM1, mRNA sequence.
ePt_567027	YES	3.50716e-24	122.112	FR625449	FR625449 WZ0AQRAS Quercus robur cDNA clone WZ0AQRAS13YI22CM1, mRNA sequence.
ePt_641494	YES	3.26599e-24	120.309	FG479120	021010KALA010913HT (KALA) Dormant kiwifruit buds three days after hydrogen cyanamide treatment Actinidia deliciosa cDNA clone KALAA01091, mRNA sequence.
ePt_572277	YES	3.19569e-24	122.112	GE529024	CCHS15877.b1_J09.ab1 CCHS Espina Barnadesia spinosa cDNA clone CCHS15877, mRNA sequence.
ePt_570514	YES	3.1654e-24	122.112	CA993959	pGH737 pGH Gossypium hirsutum cDNA 5', mRNA sequence.
ePt_637716	YES	2.94327e-24	122.112	CU587516	CU587516 OVULEI_KZ0AAB Theobroma cacao cDNA clone KZ0AAB7YA03FM1, mRNA sequence.
ePt_640182	YES	2.88269e-24	122.112	GE529024	CCHS15877.b1_J09.ab1 CCHS Espina Barnadesia spinosa cDNA clone CCHS15877, mRNA sequence.
ePt_563322	YES	2.78172e-24	122.112	FN717200	FN717200 WZOAQRAQ Quercus robur cDNA clone WZ0AQRAQ5YL23FM1, mRNA sequence.
ePt_569186	YES	2.77162e-24	122.112	EY740230	CS00-C3-705-068-H03-CT.F Sweet orange fruit, development stadium (6 of 6) Citrus sinensis cDNA, mRNA sequence.
ePt_503221	YES	2.75648e-24	122.112	CD668752	eec1c.pk006.g2 eec1c Eucalyptus tereticornis cDNA clone eec1c.pk006.g2 5' end, mRNA sequence.
ePt_503809	YES	2.39803e-24	122.112	FS340986	FS340986 LjFL3 Lotus japonicus cDNA clone LjFL3-069-CG01 5', mRNA sequence.
ePt_504139	YES	2.28697e-24	122.112	EH727536	CNMM13976.b1_P13.ab1 CNM(LMS) spotted knapweed Centaurea maculosa cDNA clone CNMM13976, mRNA sequence.
ePt_637835	YES	2.26677e-24	122.112	CU398486	CU398486 LG0ABA Eucalyptus gunnii cDNA, mRNA sequence.
ePt_636966	YES	2.25668e-24	122.112	CU473363	CU473363 CHERELS_KZ0AAC Theobroma cacao cDNA clone KZ0AAC6YB01FM1, mRNA sequence.
ePt_504170	YES	1.87299e-24	122.112	DB893953	DB893953 full-length enriched poplar cDNA library, mixture of leaf, bud, stem, root Populus nigra cDNA clone PnFL2-005_K20 3', mRNA sequence.
ePt_571782	YES	1.85784e-24	122.112	FG484152	020813KAPB999023HT (KAPB) Actinidia eriantha petal Actinidia eriantha cDNA clone KAPBB99902, mRNA sequence.
ePt_643007	YES	1.58018e-24	122.112	CU402845	CU402845 LG0ABA Eucalyptus gunnii cDNA, mRNA sequence.
ePt_503489	YES	1.57219e-24	123.915	FS391438	FS391438 normalized full-length tobacco cDNA library Nicotiana tabacum cDNA clone TBK01A01NGRL0052_3_E06 5', mRNA sequence.
ePt_570523	YES	1.45958e-24	123.915	ES593607	000001602652_O12.ab1 Eucalyptus globulus under low temperature Eucalyptus globulus cDNA, mRNA sequence.
ePt_505067	YES	1.42494e-24	123.915	ES593607	000001602652_O12.ab1 Eucalyptus globulus under low temperature Eucalyptus globulus cDNA, mRNA sequence.
ePt_643975	YES	1.34036e-24	122.112	CA811861	CA41LN03IIbF_F08 Cabernet Sauvignon Leaf - CA41LN Vitis vinifera cDNA clone CA41LN03IIbF_F08 5', mRNA sequence.
ePt_640402	YES	1.28923e-24	123.915	ES592394	000001602252_M22.ab1 Eucalyptus globulus under low temperature Eucalyptus globulus cDNA, mRNA sequence.
ePt_564596	YES	1.28472e-24	122.112	EC949340	WIN0546.C21_F17 Cab Sauv flower, leaf and root normalized (WIN05) Vitis vinifera cDNA clone WIN0546_F17 3', mRNA sequence.
ePt_639312	YES	1.24426e-24	122.112	FC871127	KN0AAK2AA08FM1 AbsCFruit1 Citrus sinensis cDNA clone KN0AAK2AA08, mRNA sequence.
ePt_567045	YES	1.06723e-24	122.112	FC871127	KN0AAK2AA08FM1 AbsCFruit1 Citrus sinensis cDNA clone KN0AAK2AA08, mRNA sequence.
ePt_566562	YES	1.05968e-24	123.915	EL966878	SI_S148 SI, cDNA forward subtractive library from peanut leaves inoculated with Cercosporidium personatum Arachis hypogaea subsp. fastigiata cDNA clone AHBGSI1006C02, mRNA sequence.
ePt_574251	YES	1.01492e-24	123.915	BI097154	SCUM73-DS4-1 Melaleuca alternifolia (Cheel) mRNA Melaleuca alternifolia cDNA, mRNA sequence.
ePt_574761	YES	1.01492e-24	123.915	BI097154	SCUM73-DS4-1 Melaleuca alternifolia (Cheel) mRNA Melaleuca alternifolia cDNA, mRNA sequence.
ePt_562853	YES	9.84606e-25	123.915	GW910155	PVUSE4NG-RP-013_K05_2APR2009_021 PVUSE4NG Phaseolus vulgaris cDNA, mRNA sequence.
ePt_565542	YES	9.25607e-25	122.112	GO528008	Mdwdr7511O13.g1 Apple_EST_Mdwdr Malus x domestica cDNA 5' similar to dbj|BAB56042.1| putative nitrate transporter [Oryza sativa (japonica cultivar-group)], mRNA sequence.
ePt_568880	YES	9.25607e-25	122.112	GO528008	Mdwdr7511O13.g1 Apple_EST_Mdwdr Malus x domestica cDNA 5' similar to dbj|BAB56042.1| putative nitrate transporter [Oryza sativa (japonica cultivar-group)], mRNA sequence.
ePt_573273	YES	9.25607e-25	122.112	GO528008	Mdwdr7511O13.g1 Apple_EST_Mdwdr Malus x domestica cDNA 5' similar to dbj|BAB56042.1| putative nitrate transporter [Oryza sativa (japonica cultivar-group)], mRNA sequence.
ePt_639985	YES	9.09796e-25	123.915	FR627283	FR627283 WZ0AQRAS Quercus robur cDNA clone WZ0AQRAS19YP04CM1, mRNA sequence.
ePt_642261	YES	8.37475e-25	123.915	EL902045	CGF2003441_G07 WRO-02: Walnut root Juglans hindsii x Juglans regia cDNA clone WRO-02-5_IV_G07 5', mRNA sequence.
ePt_575307	YES	8.24448e-25	122.112	CA794289	Cac_BL_1725 Cac_BL (Bean and Leaf from Amelonardo type Cacao) Theobroma cacao cDNA clone Cac_BL_1725 5', mRNA sequence.
ePt_641773	YES	8.1939e-25	122.112	EE258756	RFABT74TH Castor bean cDNA library from flowers,800bp Ricinus communis cDNA clone RFABT74, mRNA sequence.
ePt_637928	YES	8.09993e-25	123.915	GE567444	CCHT2516.b1_G06.ab1 CCHT Niger Seed Guizotia abyssinica cDNA clone CCHT2516, mRNA sequence.
ePt_504033	YES	7.98422e-25	123.915	FR614778	FR614778 WZOAFSAA Fagus sylvatica cDNA clone WZ0AFSAA10YF21FM1, mRNA sequence.
ePt_639592	YES	7.95529e-25	123.915	CU622120	CU622120 STEMS_KZ0AAA Theobroma cacao cDNA clone KZ0AAA15YP15FM1, mRNA sequence.
ePt_574102	YES	7.89744e-25	123.915	EY740230	CS00-C3-705-068-H03-CT.F Sweet orange fruit, development stadium (6 of 6) Citrus sinensis cDNA, mRNA sequence.
ePt_503871	YES	7.79619e-25	123.915	FR614778	FR614778 WZOAFSAA Fagus sylvatica cDNA clone WZ0AFSAA10YF21FM1, mRNA sequence.
ePt_566197	YES	6.84155e-25	123.915	FG163757	AGN_RNC014xb23r1.ab1 AGN_RNC Nicotiana tabacum cDNA 3', mRNA sequence.
ePt_642652	YES	6.82709e-25	123.915	CO112191	GR__Eb0048L07.f GR__Eb Gossypium raimondii cDNA clone GR__Eb0048L07 5', mRNA sequence.
ePt_643743	YES	6.55227e-25	123.915	CO866004	Mddb5014e18.y1 Mddb Malus x domestica cDNA clone Mddb5014e18 5' similar to TR:Q9SN90 Q9SN90 CHROMOSOME ASSEMBLY PROTEIN HOMOLOG. ;, mRNA sequence.
ePt_504014	YES	6.10388e-25	123.915	FG410029	020923KAAA009447HT (KAAA) A. deliciosa developing shoot buds Actinidia deliciosa cDNA clone KAAAA00944, mRNA sequence.
ePt_574065	YES	5.10585e-25	123.915	AJ827126	AJ827126 S3 Prunus persica cDNA clone S310J16, mRNA sequence.
ePt_573796	YES	5.09139e-25	123.915	AJ827126	AJ827126 S3 Prunus persica cDNA clone S310J16, mRNA sequence.
ePt_640828	YES	4.90563e-25	125.719	BM567822	sam89b03.y2 Gm-c1087 Glycine max cDNA clone SOYBEAN CLONE ID: Gm-c1087-1205 5', mRNA sequence.
ePt_570449	YES	4.85996e-25	123.915	AJ800129	AJ800129 Antirrhinum majus whole plant Antirrhinum majus cDNA clone 018_4_09_j04, mRNA sequence.
ePt_565346	YES	4.8455e-25	123.915	FP028484	FP028484 LG0AAA Quercus robur cDNA clone LG0AAA19YG15RM1 similar to PplGI.3|TC81488 similar to UP|Q84Q59_ARATH At3g27610, mRNA sequence.
ePt_570372	YES	4.83103e-25	123.915	DY640960	PU2_plate50_J14 PU2 Prunus persica cDNA similar to expressed mRNA inferred from 002-128-A02 [Oryza sativa (japonica cultivar-group)], mRNA sequence.
ePt_568714	YES	4.75871e-25	123.915	DV446401	CV01018B2H01.f1 CV01-normalized library Manihot esculenta cDNA clone CV01018B2H01.f1, mRNA sequence.
ePt_504101	YES	4.70085e-25	123.915	EG675485	RCRDB18TP Castor bean cDNA library from roots, 1.8 kb Ricinus communis cDNA clone RCRDB18, mRNA sequence.
ePt_563405	YES	4.643e-25	123.915	GO549717	Mdfrt3032C08_e8313.g1 Mdfrt Malus x domestica cDNA 5' similar to ref|NP_196748.1| expressed protein [Arabidopsis thaliana] pir|T48546 hypothetical protein F14F18.40 - Arabidopsis thaliana emb|CAB87660.1| putative protein [Arabidopsis thaliana], mRNA sequence.
ePt_599692	YES	4.62853e-25	123.915	ES591097	000001601752_L17.ab1 Eucalyptus globulus under low temperature Eucalyptus globulus cDNA, mRNA sequence.
ePt_503662	YES	4.52728e-25	123.915	GR187729	CBPG12299.g1 CBPG Mimulus guttatus IM62 roots, seedlings, fruits, callus (L) Mimulus guttatus cDNA clone CBPG12299 3', mRNA sequence.
ePt_566351	YES	4.49614e-25	125.719	CK289276	EST751998 Nicotiana benthamiana mixed tissue cDNA library, normalized, full-length Nicotiana benthamiana cDNA clone NBMBM70 5' end, mRNA sequence.
ePt_566886	YES	4.30173e-25	125.719	EC947742	WIN0542.C21_J03 Cab Sauv flower, leaf and root normalized (WIN05) Vitis vinifera cDNA clone WIN0542_J03 3', mRNA sequence.
ePt_504292	YES	4.18799e-25	123.915	EY846999	CA26-C1-002-061-G04-CT.F Sour orange leaf, field plant Citrus aurantium cDNA, mRNA sequence.
ePt_599880	YES	4.16937e-25	125.719	CT986823	CT986823 Eucalyptus gunnii differentiating xylem AFOCEL clone 832 Eucalyptus gunnii cDNA, mRNA sequence.
ePt_570441	YES	4.08655e-25	123.915	CA847616	EST0524 CM334 Root cDNA Capsicum annuum cDNA clone RR88-33 similar to Arabidopsis thaliana actin-related protein 2 protein., mRNA sequence.
ePt_641641	YES	4.08655e-25	123.915	CN941822	010919AVBC018021PG (AVBC) Royal Gala young shoot Malus x domestica cDNA clone AVBC018021, mRNA sequence.
ePt_575359	YES	3.83019e-25	125.719	CT985554	CT985554 Eucalyptus gunnii differentiating xylem AFOCEL clone 832 Eucalyptus gunnii cDNA, mRNA sequence.
ePt_641290	YES	3.75325e-25	123.915	ES595919	000001603752_F10.ab1 Eucalyptus globulus under low temperature Eucalyptus globulus cDNA, mRNA sequence.
ePt_571066	YES	3.57935e-25	123.915	FC871127	KN0AAK2AA08FM1 AbsCFruit1 Citrus sinensis cDNA clone KN0AAK2AA08, mRNA sequence.
ePt_563111	YES	3.50756e-25	125.719	ES590544	000001601652_A09.ab1 Eucalyptus globulus under low temperature Eucalyptus globulus cDNA, mRNA sequence.
ePt_563276	YES	3.31851e-25	123.915	EY886041	LT33-C1-003-013-F08-CT.F Tahiti lime leaf, greenhouse plant Citrus latifolia cDNA, mRNA sequence.
ePt_641139	YES	3.25525e-25	125.719	GD079591	KS17044B07 KS17 Capsicum annuum cDNA, mRNA sequence.
ePt_637079	YES	3.23871e-25	125.719	CD669664	eej1c.pk006.a9 eej1c Eucalyptus grandis cDNA clone eej1c.pk006.a9 5' end, mRNA sequence.
ePt_639535	YES	3.1808e-25	125.719	AM813540	AM813540 COL, cold overnight library Nicotiana tabacum cDNA clone nt006047066, mRNA sequence.
ePt_504042	YES	3.11048e-25	125.719	CV195408	CGF1003435_F09 Seed coat from mid-season walnut embryos collected Aug 1 Juglans regia cDNA clone WSC0003_IIF_F09 5', mRNA sequence.
ePt_639922	YES	3.08153e-25	125.719	EY047467	CATA657.fwd CATA Artemisia annua, Tanzanian, from Sandeman Seeds, 0.8-1.5Kb Artemisia annua cDNA clone CATA657 5', mRNA sequence.
ePt_504177	YES	2.96158e-25	125.719	FN769291	FN769291 WZOAQPAA Quercus petraea cDNA clone WZ0AQPAH17YI02FM1, mRNA sequence.
ePt_638426	YES	2.94089e-25	125.719	CT986314	CT986314 Eucalyptus gunnii differentiating xylem AFOCEL clone 832 Eucalyptus gunnii cDNA, mRNA sequence.
ePt_640715	YES	2.78372e-25	125.719	AM813540	AM813540 COL, cold overnight library Nicotiana tabacum cDNA clone nt006047066, mRNA sequence.
ePt_638086	YES	2.70607e-25	125.719	CU398740	CU398740 LG0ABA Eucalyptus gunnii cDNA, mRNA sequence.
ePt_562896	YES	2.62733e-25	125.719	GE529024	CCHS15877.b1_J09.ab1 CCHS Espina Barnadesia spinosa cDNA clone CCHS15877, mRNA sequence.
ePt_575308	YES	2.56931e-25	125.719	CV093402	FAMU_USDA_FP_1425 Vitis shuttleworthii L., grape Vitis shuttleworthii cDNA clone JLVs078_H07 5', mRNA sequence.
ePt_575755	YES	2.53616e-25	125.719	FN729380	FN729380 WZOAQPAC Quercus petraea cDNA clone WZ0AQPAC8YD20FM1, mRNA sequence.
ePt_569546	YES	2.3704e-25	125.719	EL902045	CGF2003441_G07 WRO-02: Walnut root Juglans hindsii x Juglans regia cDNA clone WRO-02-5_IV_G07 5', mRNA sequence.
ePt_644318	YES	2.35797e-25	125.719	GE529024	CCHS15877.b1_J09.ab1 CCHS Espina Barnadesia spinosa cDNA clone CCHS15877, mRNA sequence.
ePt_640259	YES	2.27923e-25	125.719	CU622120	CU622120 STEMS_KZ0AAA Theobroma cacao cDNA clone KZ0AAA15YP15FM1, mRNA sequence.
ePt_568314	YES	2.25437e-25	125.719	CD668752	eec1c.pk006.g2 eec1c Eucalyptus tereticornis cDNA clone eec1c.pk006.g2 5' end, mRNA sequence.
ePt_600416	YES	2.2295e-25	125.719	AJ876061	AJ876061 Prunus persica fruit mesocarp plus epidermis 80 days after bloom Prunus persica cDNA clone PR0210E02, mRNA sequence.
ePt_575148	YES	2.05545e-25	125.719	GR905591	330L_H10_016 ovule cDNA library of a seedless grape (Vitis vinifera var.Thomson seedless) Vitis vinifera cDNA, mRNA sequence.
ePt_643648	YES	2.05545e-25	125.719	GR905591	330L_H10_016 ovule cDNA library of a seedless grape (Vitis vinifera var.Thomson seedless) Vitis vinifera cDNA, mRNA sequence.
ePt_569923	YES	1.99743e-25	125.719	CT981462	CT981462 Eucalyptus gunnii differentiating xylem AFOCEL clone 832 Eucalyptus gunnii cDNA, mRNA sequence.
ePt_504593	YES	1.93942e-25	125.719	DV155620	CV03098B1B01.f1 CV03-normalized library Euphorbia esula cDNA clone CV03098B1B01.f1 5, mRNA sequence.
ePt_573078	YES	1.90192e-25	123.915	DN596772	43 Eucalyptus woody tissue TDF collection Eucalyptus grandis x Eucalyptus nitens cDNA similar to ariadne-like protein, Arabidopsis thaliana (At1g65430), mRNA sequence.
ePt_565470	YES	1.83167e-25	125.719	HS250546	CCXA1859.b1 CCXA Euonymus alatus seed tissues collected from 8/14 to 9/19/2007 normalized Euonymus alatus cDNA clone CCXA1859 5', mRNA sequence.
ePt_570917	YES	1.81924e-25	125.719	CT985338	CT985338 Eucalyptus gunnii differentiating xylem AFOCEL clone 832 Eucalyptus gunnii cDNA, mRNA sequence.
ePt_574830	YES	1.51672e-25	125.719	CT986058	CT986058 Eucalyptus gunnii differentiating xylem AFOCEL clone 832 Eucalyptus gunnii cDNA, mRNA sequence.
ePt_505050	YES	1.42141e-25	125.719	BF153169	008E11 Mature tuber lambda ZAP Solanum tuberosum cDNA 5' similar to (AP002064) copia-like retrotransposable element ... dbj|BAB01972.1, mRNA sequence.
ePt_564805	YES	1.35096e-25	125.719	GO923707	CMSMEa0004P12f CMSMEa Castanea mollissima cDNA, mRNA sequence.
ePt_574847	YES	1.27039e-25	127.522	FK293917	454GmaGlobSeed28549 Soybean Seeds Containing Globular-Stage Embryos Glycine max cDNA, mRNA sequence.
ePt_573022	YES	1.20402e-25	127.522	FC923102	C31701B03EF StrClemenN Citrus clementina cDNA clone C31701B03, mRNA sequence.
ePt_504082	YES	1.17082e-25	125.719	CN941822	010919AVBC018021PG (AVBC) Royal Gala young shoot Malus x domestica cDNA clone AVBC018021, mRNA sequence.
ePt_571509	YES	1.07117e-25	125.719	CT987747	CT987747 Eucalyptus gunnii differentiating xylem AFOCEL clone 832 Eucalyptus gunnii cDNA, mRNA sequence.
ePt_573045	YES	1.05041e-25	125.719	ES841346	UFL_076_10 Cotton fiber 0-10 day post anthesis Gossypium hirsutum cDNA, mRNA sequence.
ePt_573788	YES	1.02508e-25	127.522	EX256730	1436917_5_C19_078 PY06 Carica papaya cDNA, mRNA sequence.
ePt_569172	YES	9.88343e-26	127.522	CF810462	CA136F cDNA cold acclimated Bluecrop library Vaccinium corymbosum cDNA 5', mRNA sequence.
ePt_567595	YES	9.25858e-26	125.719	DT560672	EST1071312 GH_TMO Gossypium hirsutum cDNA, mRNA sequence.
ePt_566607	YES	9.2435e-26	127.522	HO798275	vsu-ars_023308_LI15contig_5532 VSU-ARS-L15 Phaseolus acutifolius cDNA, mRNA sequence.
ePt_504456	YES	9.08944e-26	127.522	GT702568	CA00-XX-FB2-061-B07-SB.F Coffea arabica FB2 Coffea arabica cDNA clone CA00-XX-FB2-061-B07-SB, mRNA sequence.
ePt_567864	YES	9.05098e-26	125.719	CK752307	eca01-10cs4-g11 Eca01 Eschscholzia californica cDNA clone eca01-10cs4-g11 5', mRNA sequence.
ePt_637223	YES	9.00649e-26	127.522	CV825518	Mdlv4-4040h09.y1 Mdlv4 Malus x domestica cDNA clone Mdlv4-4040h09 5' similar to TR:O22678 O22678 UDP-GLUCOSE:STEROL GLUCOSYLTRANSFERASE ;, mRNA sequence.
ePt_640562	YES	8.94723e-26	127.522	CX168474	A08_69-75_02.ab1 leaf inoculated with Marssonia pathogen of Populus deltoides Populus deltoides cDNA, mRNA sequence.
ePt_565931	YES	8.92353e-26	127.522	EY727132	CS00-C3-703-099-C12-CT.F Sweet orange fruit, development stadium (4 of 6) Citrus sinensis cDNA, mRNA sequence.
ePt_503855	YES	8.74577e-26	127.522	FP033985	FP033985 LG0AAB Quercus robur cDNA clone LG0AAB3YM24RM1 similar to PplGI.3|TC82038 weakly similar to UP|Q9FL09_ARATH Nodulin-like protein, mRNA sequence.
ePt_641759	YES	8.60356e-26	127.522	GW910155	PVUSE4NG-RP-013_K05_2APR2009_021 PVUSE4NG Phaseolus vulgaris cDNA, mRNA sequence.
ePt_600492	YES	8.21249e-26	127.522	CV044462	EST 6169 Green Apricot Fruit Lambda Zap II Library Prunus armeniaca cDNA clone bga008l16p 3', mRNA sequence.
ePt_504803	YES	8.14139e-26	127.522	CD669030	eef1c.pk003.f22 eef1c Eucalyptus tereticornis cDNA clone eef1c.pk003.f22 5' end, mRNA sequence.
ePt_564330	YES	7.99918e-26	127.522	GW910155	PVUSE4NG-RP-013_K05_2APR2009_021 PVUSE4NG Phaseolus vulgaris cDNA, mRNA sequence.
ePt_574654	YES	7.82425e-26	127.522	FR618281	FR618281 WZOAFSAA Fagus sylvatica cDNA clone WZ0AFSAA28YG20FM1, mRNA sequence.
ePt_504023	YES	7.32559e-26	127.522	CU398944	CU398944 LG0ABA Eucalyptus gunnii cDNA, mRNA sequence.
ePt_642225	YES	7.26622e-26	127.522	EV535450	RR2A743TF RR2(MS) Raphanus raphanistrum subsp. raphanistrum cDNA 5', mRNA sequence.
ePt_638925	YES	7.19498e-26	127.522	FN763685	FN763685 WZOAQPAA Quercus petraea cDNA clone WZ0AQPAH1YB06FM1, mRNA sequence.
ePt_564259	YES	7.18311e-26	127.522	ES595808	000001603752_A06.ab1 Eucalyptus globulus under low temperature Eucalyptus globulus cDNA, mRNA sequence.
ePt_574797	YES	6.9694e-26	127.522	FN763685	FN763685 WZOAQPAA Quercus petraea cDNA clone WZ0AQPAH1YB06FM1, mRNA sequence.
ePt_641390	YES	6.51823e-26	127.522	EY740230	CS00-C3-705-068-H03-CT.F Sweet orange fruit, development stadium (6 of 6) Citrus sinensis cDNA, mRNA sequence.
ePt_599597	YES	6.43512e-26	127.522	GW837491	Summer_Black_0888 Grape cv. Summer Black flower and fruit Vitis vinifera cDNA, mRNA sequence.
ePt_572230	YES	6.06706e-26	127.522	AJ876061	AJ876061 Prunus persica fruit mesocarp plus epidermis 80 days after bloom Prunus persica cDNA clone PR0210E02, mRNA sequence.
ePt_566199	YES	5.91271e-26	127.522	FG346059	EST h2h01 - [Humulus lupulus] Humulus lupulus Hermaphrodite flower cDNA Humulus lupulus cDNA clone h2h01, mRNA sequence.
ePt_636620	YES	5.86522e-26	127.522	HO798275	vsu-ars_023308_LI15contig_5532 VSU-ARS-L15 Phaseolus acutifolius cDNA, mRNA sequence.
ePt_564184	YES	5.81773e-26	127.522	ES590747	000001601652_K08.ab1 Eucalyptus globulus under low temperature Eucalyptus globulus cDNA, mRNA sequence.
ePt_503773	YES	5.62776e-26	127.522	ES593507	000001602652_J06.ab1 Eucalyptus globulus under low temperature Eucalyptus globulus cDNA, mRNA sequence.
ePt_572908	YES	5.62776e-26	127.522	CN578720	Mdfw2038o16.y1 Mdfw Malus x domestica cDNA clone Mdfw2038o16 5' similar to TR:O49182 O49182 FIMBRIN 1 ;, mRNA sequence.
ePt_504520	YES	5.60401e-26	127.522	ES842990	UFL_094_08 Cotton fiber 0-10 day post anthesis Gossypium hirsutum cDNA, mRNA sequence.
ePt_503986	YES	5.02224e-26	127.522	DW345730	PP_LEc0003K12f Peach shoot Prunus persica cDNA clone PP_LEc0003K12f, mRNA sequence.
ePt_571618	YES	4.91388e-26	129.325	ES839641	UFL_056_49 Cotton fiber 0-10 day post anthesis Gossypium hirsutum cDNA, mRNA sequence.
ePt_573075	YES	4.85602e-26	127.522	CT982071	CT982071 Eucalyptus gunnii differentiating xylem AFOCEL clone 832 Eucalyptus gunnii cDNA, mRNA sequence.
ePt_573021	YES	4.67793e-26	127.522	BI096934	SCUM19-DS3-1 Melaleuca alternifolia (Cheel) mRNA Melaleuca alternifolia cDNA, mRNA sequence.
ePt_575044	YES	4.48854e-26	129.325	FC056922	sT7aVVM_AER67B01 VVM Vitis vinifera cDNA clone VVM_AER67B01 5' similar to emb_CAO17942.1 unnamed protein product [Vitis vinifera]. Expect = 1e-83, mRNA sequence.
ePt_571665	YES	4.33361e-26	127.522	CA824617	R45E12 two-month-old roots from clone 'Beaupre' Populus trichocarpa x Populus deltoides cDNA 5', mRNA sequence.
ePt_569297	YES	4.29799e-26	127.522	CU404362	CU404362 LG0ABA Eucalyptus gunnii cDNA, mRNA sequence.
ePt_568141	YES	3.2236e-26	127.522	EB390413	EST0010 Growing bud library in mulberry leaf mutant by cDNA-AFLP Morus alba cDNA clone J10, mRNA sequence.
ePt_505010	YES	3.15081e-26	129.325	CU307285	CU307285 LG0ADM Populus tremula x Populus alba cDNA clone LG0ADM6YJ12ZM1, mRNA sequence.
ePt_572264	YES	3.0829e-26	129.325	CU307285	CU307285 LG0ADM Populus tremula x Populus alba cDNA clone LG0ADM6YJ12ZM1, mRNA sequence.
ePt_639626	YES	3.04216e-26	129.325	BQ742727	saq55c12.y1 Gm-c1076 Glycine max cDNA clone SOYBEAN CLONE ID: Gm-c1076-3599 5' similar to TR:Q9SGA1 Q9SGA1 F1C9.19 PROTEIN. ;, mRNA sequence.
ePt_642618	YES	2.94709e-26	129.325	CU307285	CU307285 LG0ADM Populus tremula x Populus alba cDNA clone LG0ADM6YJ12ZM1, mRNA sequence.
ePt_570240	YES	2.90243e-26	127.522	AM290096	AM290096 Prunus persica fruit skin mature fruit Prunus persica cDNA clone Skin64E01, mRNA sequence.
ePt_570795	YES	2.80449e-26	129.325	DW147577	CLVX12633.b1_B16.ab1 CLV(XYZ) lettuce virosa Lactuca virosa cDNA clone CLVX12633, mRNA sequence.
ePt_642599	YES	2.80449e-26	129.325	DW147577	CLVX12633.b1_B16.ab1 CLV(XYZ) lettuce virosa Lactuca virosa cDNA clone CLVX12633, mRNA sequence.
ePt_574899	YES	2.75968e-26	127.522	FR624359	FR624359 WZOAFSAA Fagus sylvatica cDNA clone WZ0AFSAA9YF15FM1, mRNA sequence.
ePt_638394	YES	2.70263e-26	129.325	CX171168	E11_69-30_09.ab1 leaf inoculated with Marssonia pathogen of Populus deltoides Populus deltoides cDNA, mRNA sequence.
ePt_572365	YES	2.60505e-26	127.522	FR617986	FR617986 WZOAFSAA Fagus sylvatica cDNA clone WZ0AFSAA26YM10FM1, mRNA sequence.
ePt_639971	YES	2.5804e-26	129.325	DB945789	DB945789 full-length enriched cassava cDNA library Manihot esculenta cDNA clone CAS01_022_J24 3', mRNA sequence.
ePt_567685	YES	2.57701e-26	129.325	DB945789	DB945789 full-length enriched cassava cDNA library Manihot esculenta cDNA clone CAS01_022_J24 3', mRNA sequence.
ePt_639291	YES	2.5125e-26	129.325	EY656382	CS00-C1-100-119-A11-CT.F Sweet orange leaf, greenhouse plant Citrus sinensis cDNA, mRNA sequence.
ePt_572917	YES	2.47854e-26	129.325	GW835032	FES011A13_8227 Ficus elastica stem cDNA library (FES) Ficus elastica cDNA clone FES011A13, mRNA sequence.
ePt_570646	YES	2.45817e-26	129.325	GW835032	FES011A13_8227 Ficus elastica stem cDNA library (FES) Ficus elastica cDNA clone FES011A13, mRNA sequence.
ePt_639891	YES	2.44799e-26	129.325	GW835032	FES011A13_8227 Ficus elastica stem cDNA library (FES) Ficus elastica cDNA clone FES011A13, mRNA sequence.
ePt_639992	YES	2.43851e-26	127.522	ES595919	000001603752_F10.ab1 Eucalyptus globulus under low temperature Eucalyptus globulus cDNA, mRNA sequence.
ePt_600612	YES	2.41064e-26	129.325	DT463768	GH_CHX14B10.r GH_CHX Gossypium hirsutum cDNA clone GH_CHX14B10 3', mRNA sequence.
ePt_643054	YES	2.40045e-26	129.325	GW835032	FES011A13_8227 Ficus elastica stem cDNA library (FES) Ficus elastica cDNA clone FES011A13, mRNA sequence.
ePt_504872	YES	2.38687e-26	129.325	CO131395	GR__Eb43K17.f GR__Eb Gossypium raimondii cDNA clone GR__Eb43K17 5', mRNA sequence.
ePt_566960	YES	2.29859e-26	129.325	CD669115	eef1c.pk004.b13 eef1c Eucalyptus tereticornis cDNA clone eef1c.pk004.b13 5' end, mRNA sequence.
ePt_563391	YES	2.26464e-26	129.325	CV270566	WS0152.B21_F09 PTxN-IB-A-6 Populus trichocarpa x Populus nigra cDNA clone WS0152_F09 3', mRNA sequence.
ePt_641068	YES	2.25446e-26	129.325	AM267432	AM267432 Ricinus phloem library Ricinus communis cDNA clone cDNA_112, mRNA sequence.
ePt_639548	YES	2.22468e-26	129.325	GO514851	Mdrtb1018N17.g1 Apple_EST_Mdrtb Malus x domestica cDNA 5' similar to ref|NP_568063.1| expressed protein [Arabidopsis thaliana], mRNA sequence.
ePt_568075	YES	1.79267e-26	129.325	EC605380	Y01F03 YLX600 Hevea brasiliensis cDNA clone Y01F03 5', mRNA sequence.
ePt_503984	YES	1.76205e-26	129.325	EL893186	CGF2003815_F02 WLN-02: walnut leaf from plants infected with Pratylenchus vulnus Juglans hindsii x Juglans regia cDNA clone WLN-02-8_III_F02 5', mRNA sequence.
ePt_564021	YES	1.70082e-26	129.325	FL810302	CCGG11730.b1 CCGG Panicum virgatum late flowering buds + seed development (H) Panicum virgatum cDNA clone CCGG11730 5', mRNA sequence.
ePt_575356	YES	1.40488e-26	129.325	CX706502	gmrtDrNS01_12-C_M13R_G08_052.s1 Water stressed 5h segment 1 gmrtDrNS01 Glycine max cDNA 3', mRNA sequence.
ePt_572005	YES	1.37451e-26	131.129	DN619412	UCRCS11_03O06_f Parent Washington Navel Orange Scale-Infested Rind cDNA Library UCRCS11 Citrus sinensis cDNA clone CS_WEd0003O06, mRNA sequence.
ePt_574401	YES	1.21099e-26	129.325	GW827196	FES018P05_0391 Ficus elastica stem cDNA library (FES) Ficus elastica cDNA clone FES018P05, mRNA sequence.
ePt_565176	YES	1.19398e-26	129.325	FR618862	FR618862 WZOAFSAA Fagus sylvatica cDNA clone WZ0AFSAA31YA17FM1, mRNA sequence.
ePt_566660	YES	1.11914e-26	129.325	DV446401	CV01018B2H01.f1 CV01-normalized library Manihot esculenta cDNA clone CV01018B2H01.f1, mRNA sequence.
ePt_571985	YES	1.0409e-26	129.325	FR600905	FR600905 WZOAFSCA Fagus sylvatica cDNA clone WZ0AFSCA20YB21NM1, mRNA sequence.
ePt_575429	YES	1.0409e-26	129.325	CV627496	Mdst6011n10.y1 Mdst Malus x domestica cDNA clone Mdst6011n10 5' similar to TR:O80330 O80330 GLUTAMINE AMIDOTRANSFERASE/CYCLASE. ;, mRNA sequence.
ePt_569340	YES	1.0239e-26	129.325	CX706630	gmrtDrNS01_14-C_M13R_B11_093.s3 Water stressed 48h segment 1 gmrtDrNS01 Glycine max cDNA 3', mRNA sequence.
ePt_642190	YES	9.91736e-27	129.325	DT560672	EST1071312 GH_TMO Gossypium hirsutum cDNA, mRNA sequence.
ePt_644384	YES	9.28013e-27	131.129	FP044074	FP044074 LG0AAC Quercus petraea cDNA clone LG0AAC30YK14RM1, mRNA sequence.
ePt_565547	YES	9.26984e-27	129.325	FN734045	FN734045 WZOAQPAC Quercus petraea cDNA clone WZ0AQPAC7YJ02FM1, mRNA sequence.
ePt_575721	YES	9.26984e-27	129.325	CV880330	Mdst6018e24.y3 Mdst Malus x domestica cDNA clone Mdst6018e24 5' similar to TR:Q9S7A8 Q9S7A8 F28J7.10 PROTEIN. ;, mRNA sequence.
ePt_563416	YES	9.08558e-27	131.129	BB910206	BB910206 Trifolium pratense three week-old plant Trifolium pratense cDNA clone RCE09125, mRNA sequence.
ePt_599238	YES	8.99719e-27	129.325	FP941555	FP941555 Clytia hemisphaerica library Clytia hemisphaerica cDNA clone SA0AAB144YC04 5', mRNA sequence.
ePt_637817	YES	8.17118e-27	131.129	EL452381	CHTM5198.b1_K04.ab1 CHT(LMS) Jerusalem artichoke Helianthus tuberosus cDNA clone CHTM5198, mRNA sequence.
ePt_563183	YES	8.08363e-27	131.129	EL899995	WRO-PSAB-aaa03h01_g1 WRO-01: Walnut root Juglans hindsii x Juglans regia cDNA clone WRO-PSAB-aaa03h01 5', mRNA sequence.
ePt_600613	YES	7.4295e-27	129.325	CU402792	CU402792 LG0ABA Eucalyptus gunnii cDNA, mRNA sequence.
ePt_572000	YES	7.36134e-27	129.325	AU308458	AU308458 zinnia cultured mesophyll cell equalized cDNA Zinnia violacea cDNA clone Z18468, mRNA sequence.
ePt_574180	YES	7.36134e-27	129.325	CK752307	eca01-10cs4-g11 Eca01 Eschscholzia californica cDNA clone eca01-10cs4-g11 5', mRNA sequence.
ePt_569127	YES	7.34434e-27	131.129	CX168474	A08_69-75_02.ab1 leaf inoculated with Marssonia pathogen of Populus deltoides Populus deltoides cDNA, mRNA sequence.
ePt_503471	YES	7.26651e-27	131.129	DT512313	WS02418.B21_P02 PTxD-ICC-N-A-14 Populus trichocarpa x Populus deltoides cDNA clone WS02418_P02 3', mRNA sequence.
ePt_565993	YES	7.15951e-27	131.129	GT690644	CA00-XX-CA1-039-H04-AB.R Coffea arabica CA1 Coffea arabica cDNA clone CA00-XX-CA1-039-H04-AB, mRNA sequence.
ePt_568365	YES	6.31533e-27	131.129	EY765733	CR05-C1-100-088-G01-CT.F Mandarin leaf, greenhouse plant Citrus reticulata cDNA, mRNA sequence.
ePt_642927	YES	6.31533e-27	131.129	EY765733	CR05-C1-100-088-G01-CT.F Mandarin leaf, greenhouse plant Citrus reticulata cDNA, mRNA sequence.
ePt_573606	YES	6.30485e-27	129.325	FG479120	021010KALA010913HT (KALA) Dormant kiwifruit buds three days after hydrogen cyanamide treatment Actinidia deliciosa cDNA clone KALAA01091, mRNA sequence.
ePt_637523	YES	6.27077e-27	129.325	FG479120	021010KALA010913HT (KALA) Dormant kiwifruit buds three days after hydrogen cyanamide treatment Actinidia deliciosa cDNA clone KALAA01091, mRNA sequence.
ePt_640201	YES	6.27077e-27	129.325	FG479120	021010KALA010913HT (KALA) Dormant kiwifruit buds three days after hydrogen cyanamide treatment Actinidia deliciosa cDNA clone KALAA01091, mRNA sequence.
ePt_574713	YES	6.21787e-27	131.129	CK087678	A017P58.3pR Hybrid aspen plasmid library Populus tremula x Populus tremuloides cDNA clone A017P58 3', mRNA sequence.
ePt_642292	YES	6.19838e-27	131.129	GW910155	PVUSE4NG-RP-013_K05_2APR2009_021 PVUSE4NG Phaseolus vulgaris cDNA, mRNA sequence.
ePt_563731	YES	6.09117e-27	131.129	EY666874	CS00-C1-102-019-E05-CT.F Sweet orange leaf, infected with Xylella fastidiosa (stage 2 of 2) Citrus sinensis cDNA, mRNA sequence.
ePt_565132	YES	5.99372e-27	131.129	FG464663	020312KAMA004854HT (KAMA) Actinidia hemsleyana roots with nematodes Actinidia hemsleyana cDNA clone KAMAA00485, mRNA sequence.
ePt_637028	YES	5.91575e-27	131.129	FN763685	FN763685 WZOAQPAA Quercus petraea cDNA clone WZ0AQPAH1YB06FM1, mRNA sequence.
ePt_564639	YES	5.75007e-27	131.129	ES597092	000001604452_P22.ab1 Eucalyptus globulus under low temperature Eucalyptus globulus cDNA, mRNA sequence.
ePt_504666	YES	5.64286e-27	131.129	GE539504	CCHS2589.b1_I24.ab1 CCHS Espina Barnadesia spinosa cDNA clone CCHS2589, mRNA sequence.
ePt_564600	YES	5.26277e-27	131.129	FC895597	IC0AAA95BD06RM1 IVIA1 Citrus clementina cDNA clone IC0AAA95BD06, mRNA sequence.
ePt_640629	YES	5.2043e-27	131.129	DV466004	MTUNUL1.P46.A11 NUL Populus fremontii x Populus angustifolia cDNA, mRNA sequence.
ePt_504067	YES	5.18481e-27	131.129	FG346059	EST h2h01 - [Humulus lupulus] Humulus lupulus Hermaphrodite flower cDNA Humulus lupulus cDNA clone h2h01, mRNA sequence.
ePt_570680	YES	5.18481e-27	131.129	FG346059	EST h2h01 - [Humulus lupulus] Humulus lupulus Hermaphrodite flower cDNA Humulus lupulus cDNA clone h2h01, mRNA sequence.
ePt_572309	YES	5.18481e-27	131.129	FG346059	EST h2h01 - [Humulus lupulus] Humulus lupulus Hermaphrodite flower cDNA Humulus lupulus cDNA clone h2h01, mRNA sequence.
ePt_503959	YES	5.0776e-27	131.129	CN900628	010715ABBA001555HT (ABBA) Pacific Rose spur buds from OFF trees Malus x domestica cDNA clone ABBA001555, mRNA sequence.
ePt_504146	YES	5.03862e-27	131.129	BU548633	GM880022B10G05 Gm-r1088 Glycine max cDNA clone Gm-r1088-8385 3', mRNA sequence.
ePt_639668	YES	4.91192e-27	131.129	ES595919	000001603752_F10.ab1 Eucalyptus globulus under low temperature Eucalyptus globulus cDNA, mRNA sequence.
ePt_599973	YES	4.45387e-27	131.129	ES589247	000001480252_O12.ab1 Eucalyptus globulus under low temperature Eucalyptus globulus cDNA, mRNA sequence.
ePt_572763	YES	4.35641e-27	131.129	HS250546	CCXA1859.b1 CCXA Euonymus alatus seed tissues collected from 8/14 to 9/19/2007 normalized Euonymus alatus cDNA clone CCXA1859 5', mRNA sequence.
ePt_569104	YES	3.85937e-27	131.129	EH772339	CNSM4873.b1_A20.ab1 CNS(LMS) yellow starthistle Centaurea solstitialis cDNA clone CNSM4873, mRNA sequence.
ePt_568592	YES	3.55725e-27	131.129	CA824617	R45E12 two-month-old roots from clone 'Beaupre' Populus trichocarpa x Populus deltoides cDNA 5', mRNA sequence.
ePt_568616	YES	3.55725e-27	131.129	CA824617	R45E12 two-month-old roots from clone 'Beaupre' Populus trichocarpa x Populus deltoides cDNA 5', mRNA sequence.
ePt_575625	YES	3.55725e-27	131.129	CA824617	R45E12 two-month-old roots from clone 'Beaupre' Populus trichocarpa x Populus deltoides cDNA 5', mRNA sequence.
ePt_503359	YES	3.52801e-27	131.129	FN015432	FN015432 Petunia axillaris subsp. axillaris pool of root and petal tissue Petunia axillaris subsp. axillaris cDNA clone dr004P0029C17_F.ab1 2007-08-10, mRNA sequence.
ePt_639501	YES	3.52801e-27	131.129	FN015432	FN015432 Petunia axillaris subsp. axillaris pool of root and petal tissue Petunia axillaris subsp. axillaris cDNA clone dr004P0029C17_F.ab1 2007-08-10, mRNA sequence.
ePt_567907	YES	3.38182e-27	131.129	CT983855	CT983855 Eucalyptus gunnii differentiating xylem AFOCEL clone 832 Eucalyptus gunnii cDNA, mRNA sequence.
ePt_571752	YES	3.0797e-27	131.129	CD669802	eep1c.pk001.i10 eep1c Eucalyptus grandis cDNA clone eep1c.pk001.i10 5' end, mRNA sequence.
ePt_571440	YES	2.93901e-27	131.129	CF608045	GEMMA01_001579 Grape Bud pSPORT1 Library Vitis vinifera cDNA 5', mRNA sequence.
ePt_504908	YES	2.89996e-27	131.129	FG512159	030704KAYB002651HT (KAYB) Actinidia chinensis young leaf library Actinidia chinensis cDNA clone KAYBB00265, mRNA sequence.
ePt_570771	YES	2.89996e-27	131.129	FG512159	030704KAYB002651HT (KAYB) Actinidia chinensis young leaf library Actinidia chinensis cDNA clone KAYBB00265, mRNA sequence.
ePt_565743	YES	2.88043e-27	131.129	FG512159	030704KAYB002651HT (KAYB) Actinidia chinensis young leaf library Actinidia chinensis cDNA clone KAYBB00265, mRNA sequence.
ePt_566283	YES	2.59727e-27	131.129	CF608045	GEMMA01_001579 Grape Bud pSPORT1 Library Vitis vinifera cDNA 5', mRNA sequence.
ePt_599281	YES	2.59727e-27	131.129	CF608045	GEMMA01_001579 Grape Bud pSPORT1 Library Vitis vinifera cDNA 5', mRNA sequence.
ePt_570920	YES	2.5875e-27	131.129	CF608045	GEMMA01_001579 Grape Bud pSPORT1 Library Vitis vinifera cDNA 5', mRNA sequence.
ePt_567205	YES	2.32993e-27	132.932	HS256178	CCXA4862.b1 CCXA Euonymus alatus seed tissues collected from 8/14 to 9/19/2007 normalized Euonymus alatus cDNA clone CCXA4862 5', mRNA sequence.
ePt_641579	YES	2.26862e-27	132.932	CK098332	A011P49.5pR Hybrid aspen plasmid library Populus tremula x Populus tremuloides cDNA clone A011P49 5', mRNA sequence.
ePt_563279	YES	2.26305e-27	132.932	DW147577	CLVX12633.b1_B16.ab1 CLV(XYZ) lettuce virosa Lactuca virosa cDNA clone CLVX12633, mRNA sequence.
ePt_562742	YES	2.10697e-27	132.932	CK098332	A011P49.5pR Hybrid aspen plasmid library Populus tremula x Populus tremuloides cDNA clone A011P49 5', mRNA sequence.
ePt_569490	YES	2.10697e-27	132.932	CK098332	A011P49.5pR Hybrid aspen plasmid library Populus tremula x Populus tremuloides cDNA clone A011P49 5', mRNA sequence.
ePt_571713	YES	2.09583e-27	132.932	CK098332	A011P49.5pR Hybrid aspen plasmid library Populus tremula x Populus tremuloides cDNA clone A011P49 5', mRNA sequence.
ePt_599887	YES	1.99271e-27	132.932	EY153953	CBTN5060.g1_G17.ab1:P Triphysaria pusilla root tip normalized cDNA library Triphysaria pusilla cDNA, mRNA sequence.
ePt_572423	YES	1.94812e-27	132.932	FC056968	sT7aVVM_AER82E07 VVM Vitis vinifera cDNA clone VVM_AER82E07 5' similar to emb_CAO44820.1 unnamed protein product [Vitis vinifera]. Expect = 1e-85, mRNA sequence.
ePt_641201	YES	1.85057e-27	132.932	AM267432	AM267432 Ricinus phloem library Ricinus communis cDNA clone cDNA_112, mRNA sequence.
ePt_563194	YES	1.8345e-27	132.932	ES595808	000001603752_A06.ab1 Eucalyptus globulus under low temperature Eucalyptus globulus cDNA, mRNA sequence.
ePt_571796	YES	1.70047e-27	132.932	DT598693	yfi01-4ms3-g12 Yfi01 Yucca filamentosa cDNA clone yfi01-4ms3-g12 5', mRNA sequence.
ePt_566915	YES	1.67534e-27	132.932	FN763685	FN763685 WZOAQPAA Quercus petraea cDNA clone WZ0AQPAH1YB06FM1, mRNA sequence.
ePt_641473	YES	1.59995e-27	132.932	CK098332	A011P49.5pR Hybrid aspen plasmid library Populus tremula x Populus tremuloides cDNA clone A011P49 5', mRNA sequence.
ePt_572765	YES	1.58041e-27	132.932	FC891203	IC0AAA35DE07RM2 IVIA1 Citrus clementina cDNA clone IC0AAA35DE07, mRNA sequence.
ePt_504348	YES	1.55528e-27	132.932	ES588673	000001480052_O12.ab1 Eucalyptus globulus under low temperature Eucalyptus globulus cDNA, mRNA sequence.
ePt_571658	YES	1.53852e-27	132.932	CU400493	CU400493 LG0ABA Eucalyptus gunnii cDNA, mRNA sequence.
ePt_642931	YES	1.48826e-27	132.932	CO514874	s13dSG56D0500046_328408 Glandular trichomes Medicago sativa cDNA, mRNA sequence.
ePt_640749	YES	1.39333e-27	132.932	DR997659	Mdfb8004K06.g1 Apple_EST_Mdfb Malus x domestica cDNA similar to ref|NP_199351.1| urea active transporter-related protein [Arabidopsis thaliana] dbj|BAB09166.1| urea active transporter-like protein [Arabidopsis thaliana], mRNA sequence.
ePt_642093	YES	1.34586e-27	132.932	ES596812	000001604452_D10.ab1 Eucalyptus globulus under low temperature Eucalyptus globulus cDNA, mRNA sequence.
ePt_504553	YES	1.31794e-27	132.932	ES596812	000001604452_D10.ab1 Eucalyptus globulus under low temperature Eucalyptus globulus cDNA, mRNA sequence.
ePt_643992	YES	1.31794e-27	132.932	ES596812	000001604452_D10.ab1 Eucalyptus globulus under low temperature Eucalyptus globulus cDNA, mRNA sequence.
ePt_637245	YES	1.29839e-27	132.932	DT516616	WS02431.B21_O23 PTxD-ICC-N-A-14 Populus trichocarpa x Populus deltoides cDNA clone WS02431_O23 3', mRNA sequence.
ePt_570658	YES	1.17553e-27	132.932	EY844847	CA26-C1-002-042-D08-CT.F Sour orange leaf, field plant Citrus aurantium cDNA, mRNA sequence.
ePt_563588	YES	1.1532e-27	132.932	EC771077	EST 7573 Guarana fruits cDNA library Paullinia cupana var. sorbilis cDNA, mRNA sequence.
ePt_563136	YES	1.14203e-27	132.932	CV045889	EST 7596 Green Apricot Fruit Lambda Zap II Library Prunus armeniaca cDNA clone bga007c12q 5', mRNA sequence.
ePt_599609	YES	1.10573e-27	132.932	AM823999	AM823999 COL, cold overnight library Nicotiana tabacum cDNA clone nt006162018, mRNA sequence.
ePt_565897	YES	1.08618e-27	132.932	CX629821	GCW003J05r GCW Hordeum vulgare cDNA clone GCW003J05 5-PRIME, mRNA sequence.
ePt_565029	YES	1.07501e-27	132.932	EY076504	CAZI12329.fwd CAZI Artemisia annua normalized leaf library Artemisia annua cDNA clone CAZI12329 5', mRNA sequence.
ePt_638473	YES	1.07222e-27	132.932	EC923135	WIN019.C21_C20 Cab Sauv pericarp non-normalized (WIN01) Vitis vinifera cDNA clone WIN019_C20 3', mRNA sequence.
ePt_503649	YES	1.0443e-27	132.932	CU397648	CU397648 LG0ABA Eucalyptus gunnii cDNA, mRNA sequence.
ePt_572752	YES	9.82869e-28	132.932	GW827196	FES018P05_0391 Ficus elastica stem cDNA library (FES) Ficus elastica cDNA clone FES018P05, mRNA sequence.
ePt_573365	YES	9.63323e-28	132.932	EY844847	CA26-C1-002-042-D08-CT.F Sour orange leaf, field plant Citrus aurantium cDNA, mRNA sequence.
ePt_642858	YES	9.32609e-28	132.932	EY832466	PT11-C2-300-088-E07-CT.F Poncirus trifoliata bark, greenhouse plant Citrus trifoliata cDNA, mRNA sequence.
ePt_565352	YES	9.2144e-28	132.932	CK093488	G121P83.3pR Populus tension wood cDNA library Populus tremula x Populus tremuloides cDNA clone G121P83 3', mRNA sequence.
ePt_562970	YES	8.79556e-28	132.932	EY832466	PT11-C2-300-088-E07-CT.F Poncirus trifoliata bark, greenhouse plant Citrus trifoliata cDNA, mRNA sequence.
ePt_638823	YES	8.73972e-28	132.932	ES589528	000001480352_L08.ab1 Eucalyptus globulus under low temperature Eucalyptus globulus cDNA, mRNA sequence.
ePt_640334	YES	8.46049e-28	132.932	ES593507	000001602652_J06.ab1 Eucalyptus globulus under low temperature Eucalyptus globulus cDNA, mRNA sequence.
ePt_643539	YES	8.19661e-28	132.932	DT560672	EST1071312 GH_TMO Gossypium hirsutum cDNA, mRNA sequence.
ePt_640394	YES	7.61759e-28	134.736	FC056922	sT7aVVM_AER67B01 VVM Vitis vinifera cDNA clone VVM_AER67B01 5' similar to emb_CAO17942.1 unnamed protein product [Vitis vinifera]. Expect = 1e-83, mRNA sequence.
ePt_573560	YES	7.2175e-28	132.932	CU400691	CU400691 LG0ABA Eucalyptus gunnii cDNA, mRNA sequence.
ePt_573310	YES	6.46218e-28	132.932	FP032582	FP032582 LG0AAB Quercus robur cDNA clone LG0AAB7YO21RM1, mRNA sequence.
ePt_571236	YES	6.37825e-28	132.932	BP070484	BP070484 Lotus corniculatus var. japonicus nodulating root Lotus japonicus cDNA clone GNf042g06 3', mRNA sequence.
ePt_566568	YES	6.18243e-28	132.932	BG511424	sad17f04.y1 Gm-c1074 Glycine max cDNA clone GENOME SYSTEMS CLONE ID: Gm-c1074-632 5' similar to TR:O23286 O23286 HYPOTHETICAL 93.7 KD PROTEIN. ;, mRNA sequence.
ePt_503631	YES	5.95863e-28	132.932	DB883749	DB883749 full-length enriched poplar cDNA library, mixture of leaf, bud, stem, root Populus nigra cDNA clone PnFL2-051_J13 5', mRNA sequence.
ePt_504214	YES	5.78107e-28	134.736	ES595801	000001603452_P19.ab1 Eucalyptus globulus under low temperature Eucalyptus globulus cDNA, mRNA sequence.
ePt_504902	YES	5.56547e-28	134.736	CA993957	pGH730 pGH Gossypium hirsutum cDNA 5', mRNA sequence.
ePt_639434	YES	5.41376e-28	134.736	CT983855	CT983855 Eucalyptus gunnii differentiating xylem AFOCEL clone 832 Eucalyptus gunnii cDNA, mRNA sequence.
ePt_642373	YES	5.29399e-28	134.736	CX295397	C05071G07SK PhIFruit1 Citrus clementina cDNA clone C05071G07, mRNA sequence.
ePt_572442	YES	5.16794e-28	134.736	AM846483	AM846483 seedling library, SL Nicotiana tabacum cDNA clone nt002335039, mRNA sequence.
ePt_573545	YES	5.15194e-28	134.736	CA993957	pGH730 pGH Gossypium hirsutum cDNA 5', mRNA sequence.
ePt_639849	YES	4.84794e-28	134.736	EY666874	CS00-C1-102-019-E05-CT.F Sweet orange leaf, infected with Xylella fastidiosa (stage 2 of 2) Citrus sinensis cDNA, mRNA sequence.
ePt_640626	YES	4.42395e-28	134.736	FG477362	020911KALA007951HT (KALA) Dormant kiwifruit buds three days after hydrogen cyanamide treatment Actinidia deliciosa cDNA clone KALAA00795, mRNA sequence.
ePt_599716	YES	4.23195e-28	134.736	FG477362	020911KALA007951HT (KALA) Dormant kiwifruit buds three days after hydrogen cyanamide treatment Actinidia deliciosa cDNA clone KALAA00795, mRNA sequence.
ePt_599299	YES	4.19995e-28	134.736	EE068254	C3B00423 Clusters 4 cm (VvC3) Vitis vinifera cDNA clone C3B00423, mRNA sequence.
ePt_640929	YES	4.16795e-28	134.736	CN900628	010715ABBA001555HT (ABBA) Pacific Rose spur buds from OFF trees Malus x domestica cDNA clone ABBA001555, mRNA sequence.
ePt_570232	YES	3.73596e-28	134.736	DV155620	CV03098B1B01.f1 CV03-normalized library Euphorbia esula cDNA clone CV03098B1B01.f1 5, mRNA sequence.
ePt_503686	YES	3.21596e-28	134.736	ES590544	000001601652_A09.ab1 Eucalyptus globulus under low temperature Eucalyptus globulus cDNA, mRNA sequence.
ePt_566145	YES	3.21596e-28	134.736	FR618862	FR618862 WZOAFSAA Fagus sylvatica cDNA clone WZ0AFSAA31YA17FM1, mRNA sequence.
ePt_571714	YES	3.16796e-28	134.736	EH772339	CNSM4873.b1_A20.ab1 CNS(LMS) yellow starthistle Centaurea solstitialis cDNA clone CNSM4873, mRNA sequence.
ePt_575337	YES	3.13596e-28	134.736	GW827196	FES018P05_0391 Ficus elastica stem cDNA library (FES) Ficus elastica cDNA clone FES018P05, mRNA sequence.
ePt_563434	YES	3.11996e-28	134.736	CX704966	gmrtDrNS01_37-B_M13R_C01_011.s2 Water stressed 5h segment 2 gmrtDrNS01 Glycine max cDNA 3', mRNA sequence.
ePt_564893	YES	3.00796e-28	134.736	EH772339	CNSM4873.b1_A20.ab1 CNS(LMS) yellow starthistle Centaurea solstitialis cDNA clone CNSM4873, mRNA sequence.
ePt_568136	YES	2.96796e-28	134.736	CT986058	CT986058 Eucalyptus gunnii differentiating xylem AFOCEL clone 832 Eucalyptus gunnii cDNA, mRNA sequence.
ePt_569277	YES	2.96796e-28	134.736	EV046629	BNSCS3CT_UP_126_D08_09MAY2007_058 Brassica napus BNSCS3CT Brassica napus cDNA 5', mRNA sequence.
ePt_575268	YES	2.92797e-28	134.736	ES595064	000001603252_J12.ab1 Eucalyptus globulus under low temperature Eucalyptus globulus cDNA, mRNA sequence.
ePt_643746	YES	2.90397e-28	134.736	ES593285	000001602552_M22.ab1 Eucalyptus globulus under low temperature Eucalyptus globulus cDNA, mRNA sequence.
ePt_644093	YES	2.89597e-28	134.736	FN015432	FN015432 Petunia axillaris subsp. axillaris pool of root and petal tissue Petunia axillaris subsp. axillaris cDNA clone dr004P0029C17_F.ab1 2007-08-10, mRNA sequence.
ePt_566813	YES	2.84797e-28	134.736	CT986058	CT986058 Eucalyptus gunnii differentiating xylem AFOCEL clone 832 Eucalyptus gunnii cDNA, mRNA sequence.
ePt_569640	YES	2.81597e-28	134.736	FN015432	FN015432 Petunia axillaris subsp. axillaris pool of root and petal tissue Petunia axillaris subsp. axillaris cDNA clone dr004P0029C17_F.ab1 2007-08-10, mRNA sequence.
ePt_575769	YES	2.79197e-28	134.736	CT983855	CT983855 Eucalyptus gunnii differentiating xylem AFOCEL clone 832 Eucalyptus gunnii cDNA, mRNA sequence.
ePt_567708	YES	2.71197e-28	134.736	EX571113	N1385 Pisum sativum shoot apical meristem ESTs Pisum sativum cDNA clone N1385, mRNA sequence.
ePt_571889	YES	2.68797e-28	134.736	GT001229	TransId-210663 CACATN1 Coffea arabica cDNA clone CACATN1-3929TV similar to DEAD-box ATP-dependent RNA helicase 50 - Arabidopsis thaliana (Mouse-ear cress), mRNA sequence.
ePt_573944	YES	2.67197e-28	134.736	ES595064	000001603252_J12.ab1 Eucalyptus globulus under low temperature Eucalyptus globulus cDNA, mRNA sequence.
ePt_504159	YES	2.45597e-28	134.736	EC951517	WIN0552.C21_O03 Cab Sauv flower, leaf and root normalized (WIN05) Vitis vinifera cDNA clone WIN0552_O03 3', mRNA sequence.
ePt_639165	YES	2.43197e-28	134.736	CB288398	V-B-14E02 VAN-Baker-1 Vitis aestivalis cDNA clone V-B-14E02 5', mRNA sequence.
ePt_570164	YES	2.41354e-28	136.539	EY770604	CR05-C1-102-047-G03-CT.F Mandarin leaf, infected with Xylella fastidiosa (stage 1 of 2) Citrus reticulata cDNA, mRNA sequence.
ePt_568981	YES	2.28771e-28	136.539	FC906105	IC0AAA79BD03RM1 IVIA1 Citrus clementina cDNA clone IC0AAA79BD03, mRNA sequence.
ePt_568194	YES	1.85991e-28	136.539	BF646839	NF076B08EC1F1064 Elicited cell culture Medicago truncatula cDNA clone NF076B08EC 5', mRNA sequence.
ePt_644176	YES	1.74781e-28	136.539	GT702568	CA00-XX-FB2-061-B07-SB.F Coffea arabica FB2 Coffea arabica cDNA clone CA00-XX-FB2-061-B07-SB, mRNA sequence.
ePt_573100	YES	1.71807e-28	136.539	EY655197	CS00-C1-100-071-H07-CT.F Sweet orange leaf, greenhouse plant Citrus sinensis cDNA, mRNA sequence.
ePt_640884	YES	1.6746e-28	136.539	EH727243	CNMM13680.b1_O12.ab1 CNM(LMS) spotted knapweed Centaurea maculosa cDNA clone CNMM13680, mRNA sequence.
ePt_637508	YES	1.53277e-28	136.539	GW910155	PVUSE4NG-RP-013_K05_2APR2009_021 PVUSE4NG Phaseolus vulgaris cDNA, mRNA sequence.
ePt_567806	YES	1.48522e-28	136.539	EY765733	CR05-C1-100-088-G01-CT.F Mandarin leaf, greenhouse plant Citrus reticulata cDNA, mRNA sequence.
ePt_503782	YES	1.47376e-28	136.539	FP028787	FP028787 LG0AAA Quercus robur cDNA clone LG0AAA18YJ11RM1, mRNA sequence.
ePt_599674	YES	1.45772e-28	136.539	GE633178	LINN_XX_111_F24_LINN111.CR_F24 R. communis developing seed Ricinus communis cDNA, mRNA sequence.
ePt_575352	YES	1.45084e-28	136.539	DT467355	GH_CHX20E14.r GH_CHX Gossypium hirsutum cDNA clone GH_CHX20E14 3', mRNA sequence.
ePt_637584	YES	1.4348e-28	136.539	CO514874	s13dSG56D0500046_328408 Glandular trichomes Medicago sativa cDNA, mRNA sequence.
ePt_574446	YES	1.27894e-28	136.539	CK092339	G079P36.3pR Populus tension wood cDNA library Populus tremula x Populus tremuloides cDNA clone G079P36 3', mRNA sequence.
ePt_567373	YES	1.21247e-28	136.539	EL902045	CGF2003441_G07 WRO-02: Walnut root Juglans hindsii x Juglans regia cDNA clone WRO-02-5_IV_G07 5', mRNA sequence.
ePt_568515	YES	1.20789e-28	136.539	EX900653	RS2CA44JQ RS2(RS) Raphanus sativus cDNA 3', mRNA sequence.
ePt_571806	YES	1.20789e-28	136.539	AW933836	EST359679 tomato fruit mature green, TAMU Solanum lycopersicum cDNA clone cLEF56N19 5', mRNA sequence.
ePt_574617	YES	1.20789e-28	136.539	AW933836	EST359679 tomato fruit mature green, TAMU Solanum lycopersicum cDNA clone cLEF56N19 5', mRNA sequence.
ePt_572089	YES	1.2056e-28	136.539	CT981924	CT981924 Eucalyptus gunnii differentiating xylem AFOCEL clone 832 Eucalyptus gunnii cDNA, mRNA sequence.
ePt_637427	YES	1.16205e-28	136.539	DT455512	PP_YEb0037H01 Peach developing fruit mesocarp Stage S4 Prunus persica cDNA clone PP_YEb0037H01, mRNA sequence.
ePt_568901	YES	1.14142e-28	136.539	DT587425	she01-29ms4-b11 She01 Saruma henryi cDNA clone she01-29ms4-b11 5', mRNA sequence.
ePt_572949	YES	1.14142e-28	136.539	DT587425	she01-29ms4-b11 She01 Saruma henryi cDNA clone she01-29ms4-b11 5', mRNA sequence.
ePt_638304	YES	1.14142e-28	136.539	GO499216	Mdstw6032K21.g1 Apple_EST_Mdstw Malus x domestica cDNA 5' similar to gb|AAO62352.1| subtilase [Casuarina glauca], mRNA sequence.
ePt_571477	YES	1.13684e-28	136.539	DT587425	she01-29ms4-b11 She01 Saruma henryi cDNA clone she01-29ms4-b11 5', mRNA sequence.
ePt_563025	YES	9.94733e-29	136.539	ES594806	000001603052_M21.ab1 Eucalyptus globulus under low temperature Eucalyptus globulus cDNA, mRNA sequence.
ePt_643848	YES	8.45752e-29	136.539	CU397648	CU397648 LG0ABA Eucalyptus gunnii cDNA, mRNA sequence.
ePt_639244	YES	8.36584e-29	136.539	CA824617	R45E12 two-month-old roots from clone 'Beaupre' Populus trichocarpa x Populus deltoides cDNA 5', mRNA sequence.
ePt_504142	YES	8.27416e-29	136.539	CV825518	Mdlv4-4040h09.y1 Mdlv4 Malus x domestica cDNA clone Mdlv4-4040h09 5' similar to TR:O22678 O22678 UDP-GLUCOSE:STEROL GLUCOSYLTRANSFERASE ;, mRNA sequence.
ePt_567502	YES	7.4032e-29	136.539	EX571113	N1385 Pisum sativum shoot apical meristem ESTs Pisum sativum cDNA clone N1385, mRNA sequence.
ePt_562810	YES	6.82004e-29	136.539	FG512159	030704KAYB002651HT (KAYB) Actinidia chinensis young leaf library Actinidia chinensis cDNA clone KAYBB00265, mRNA sequence.
ePt_565164	YES	6.79708e-29	136.539	FG512159	030704KAYB002651HT (KAYB) Actinidia chinensis young leaf library Actinidia chinensis cDNA clone KAYBB00265, mRNA sequence.
ePt_638201	YES	6.36078e-29	136.539	CU401246	CU401246 LG0ABA Eucalyptus gunnii cDNA, mRNA sequence.
ePt_504873	YES	5.79409e-29	138.342	DT477718	WS02520.BR_M14 PT-MB-N-A-15 Populus trichocarpa cDNA clone WS02520_M14 5', mRNA sequence.
ePt_644184	YES	5.27629e-29	138.342	CX171168	E11_69-30_09.ab1 leaf inoculated with Marssonia pathogen of Populus deltoides Populus deltoides cDNA, mRNA sequence.
ePt_567725	YES	5.07966e-29	138.342	EY737003	CS00-C3-705-023-D06-CT.F Sweet orange fruit, development stadium (6 of 6) Citrus sinensis cDNA, mRNA sequence.
ePt_567236	YES	5.02892e-29	136.539	FR617986	FR617986 WZOAFSAA Fagus sylvatica cDNA clone WZ0AFSAA26YM10FM1, mRNA sequence.
ePt_574509	YES	5.01412e-29	138.342	CX288362	C01019F05SK Veg1 Citrus clementina cDNA clone C01019F05, mRNA sequence.
ePt_504036	YES	4.96824e-29	138.342	EL902291	CGF2003445_A07 WRO-02: Walnut root Juglans hindsii x Juglans regia cDNA clone WRO-02-6_IV_A07 5', mRNA sequence.
ePt_573823	YES	4.96824e-29	138.342	EL902291	CGF2003445_A07 WRO-02: Walnut root Juglans hindsii x Juglans regia cDNA clone WRO-02-6_IV_A07 5', mRNA sequence.
ePt_563014	YES	4.95513e-29	138.342	EY666874	CS00-C1-102-019-E05-CT.F Sweet orange leaf, infected with Xylella fastidiosa (stage 2 of 2) Citrus sinensis cDNA, mRNA sequence.
ePt_639224	YES	4.94857e-29	138.342	EX232847	PY01078X1C09.f1 PY01 Carica papaya cDNA, mRNA sequence.
ePt_565789	YES	4.22897e-29	138.342	FG500622	030701KAWC016224HT (KAWC) Actinidia chinensis - active meristems Actinidia chinensis cDNA clone KAWCC01622, mRNA sequence.
ePt_575450	YES	4.2224e-29	138.342	FS589454	FS589454 Acacia mangium developing secondary xylem and shoot normalized cDNA library Acacia mangium cDNA clone AM1018B18 5', mRNA sequence.
ePt_638419	YES	3.97943e-29	138.342	EY666874	CS00-C1-102-019-E05-CT.F Sweet orange leaf, infected with Xylella fastidiosa (stage 2 of 2) Citrus sinensis cDNA, mRNA sequence.
ePt_565256	YES	3.9269e-29	138.342	EC953750	WIN0559.C21_K16 Cab Sauv flower, leaf and root normalized (WIN05) Vitis vinifera cDNA clone WIN0559_K16 3', mRNA sequence.
ePt_504293	YES	3.91377e-29	138.342	DN238608	MUC4LH1009_H01_.b_012. Musa acuminata leaves HOT stress Musa acuminata subsp. burmannicoides cDNA 5', mRNA sequence.
ePt_567811	YES	3.81527e-29	138.342	DT598693	yfi01-4ms3-g12 Yfi01 Yucca filamentosa cDNA clone yfi01-4ms3-g12 5', mRNA sequence.
ePt_573165	YES	3.81527e-29	138.342	DT598693	yfi01-4ms3-g12 Yfi01 Yucca filamentosa cDNA clone yfi01-4ms3-g12 5', mRNA sequence.
ePt_567365	YES	3.74303e-29	138.342	CU396657	CU396657 LG0ABA Eucalyptus gunnii cDNA, mRNA sequence.
ePt_568057	YES	3.74303e-29	138.342	CU396657	CU396657 LG0ABA Eucalyptus gunnii cDNA, mRNA sequence.
ePt_503865	YES	3.58543e-29	138.342	CD668843	eec1c.pk007.i10 eec1c Eucalyptus tereticornis cDNA clone eec1c.pk007.i10 5' end, mRNA sequence.
ePt_641150	YES	3.52633e-29	138.342	EH719778	CNML6251.b1_F03.ab1 CNM(LMS) spotted knapweed Centaurea maculosa cDNA clone CNML6251, mRNA sequence.
ePt_567331	YES	3.20456e-29	138.342	ES592398	000001602252_N02.ab1 Eucalyptus globulus under low temperature Eucalyptus globulus cDNA, mRNA sequence.
ePt_637404	YES	3.20456e-29	138.342	EY765410	CR05-C1-100-086-C02-CT.F Mandarin leaf, greenhouse plant Citrus reticulata cDNA, mRNA sequence.
ePt_575673	YES	2.92876e-29	138.342	DV155620	CV03098B1B01.f1 CV03-normalized library Euphorbia esula cDNA clone CV03098B1B01.f1 5, mRNA sequence.
ePt_636880	YES	2.79742e-29	138.342	ES592398	000001602252_N02.ab1 Eucalyptus globulus under low temperature Eucalyptus globulus cDNA, mRNA sequence.
ePt_640318	YES	2.61356e-29	138.342	CX629821	GCW003J05r GCW Hordeum vulgare cDNA clone GCW003J05 5-PRIME, mRNA sequence.
ePt_504987	YES	2.60042e-29	138.342	EX251816	PY04107X1H05.f1 PY04 Carica papaya cDNA, mRNA sequence.
ePt_504477	YES	2.55445e-29	138.342	CX629821	GCW003J05r GCW Hordeum vulgare cDNA clone GCW003J05 5-PRIME, mRNA sequence.
ePt_503387	YES	2.51505e-29	138.342	EL472740	CHTS19068.b1_G16.ab1 CHT(LMS) Jerusalem artichoke Helianthus tuberosus cDNA clone CHTS19068, mRNA sequence.
ePt_565916	YES	2.51505e-29	138.342	EY076504	CAZI12329.fwd CAZI Artemisia annua normalized leaf library Artemisia annua cDNA clone CAZI12329 5', mRNA sequence.
ePt_637295	YES	2.43625e-29	138.342	CU397648	CU397648 LG0ABA Eucalyptus gunnii cDNA, mRNA sequence.
ePt_571720	YES	2.32462e-29	138.342	FR599756	FR599756 WZOAFSCA Fagus sylvatica cDNA clone WZ0AFSCA18YP08FM1, mRNA sequence.
ePt_504218	YES	2.19329e-29	138.342	CB628546	OSIIEb04C23.f OSIIEb Oryza sativa Indica Group cDNA clone OSIIEb04C23 5', mRNA sequence.
ePt_563119	YES	2.09478e-29	138.342	FC865005	PPN005A10-T7 PPN Prunus persica cDNA clone PPN005A10, mRNA sequence.
ePt_575602	YES	1.9145e-29	138.342	ES593183	000001602552_G16.ab1 Eucalyptus globulus under low temperature Eucalyptus globulus cDNA, mRNA sequence.
ePt_599646	YES	1.8835e-29	140.146	FC906105	IC0AAA79BD03RM1 IVIA1 Citrus clementina cDNA clone IC0AAA79BD03, mRNA sequence.
ePt_572845	YES	1.87223e-29	140.146	EY874755	CL06-C4-501-029-H07-CT.F Rangpur lime root, plant with hydric stress Citrus limonia cDNA, mRNA sequence.
ePt_574815	YES	1.86472e-29	140.146	EY874755	CL06-C4-501-029-H07-CT.F Rangpur lime root, plant with hydric stress Citrus limonia cDNA, mRNA sequence.
ePt_567757	YES	1.78292e-29	138.342	FN754118	FN754118 WZOAQRAP Quercus robur cDNA clone WZ0AQRAP4YD02FM1, mRNA sequence.
ePt_563876	YES	1.73891e-29	140.146	CU396554	CU396554 LG0ABA Eucalyptus gunnii cDNA, mRNA sequence.
ePt_638623	YES	1.70135e-29	140.146	CU396554	CU396554 LG0ABA Eucalyptus gunnii cDNA, mRNA sequence.
ePt_504403	YES	1.66755e-29	140.146	FP031225	FP031225 LG0AAA Quercus robur cDNA clone LG0AAA11YM04RM1 similar to PplGI.3|TC64475 similar to GB|CAB43627.1|4914424|ATT22F8 Inositol monophosphatase-like protein {Arabidopsis thaliana}, mRNA sequence.
ePt_504232	YES	1.3239e-29	140.146	CD669030	eef1c.pk003.f22 eef1c Eucalyptus tereticornis cDNA clone eef1c.pk003.f22 5' end, mRNA sequence.
ePt_639570	YES	1.28291e-29	138.342	CU404949	CU404949 LG0ABA Eucalyptus gunnii cDNA, mRNA sequence.
ePt_640771	YES	1.24503e-29	140.146	GW910155	PVUSE4NG-RP-013_K05_2APR2009_021 PVUSE4NG Phaseolus vulgaris cDNA, mRNA sequence.
ePt_573324	YES	1.23043e-29	140.146	EY764872	CR05-C1-100-089-C11-CT.F Mandarin leaf, greenhouse plant Citrus reticulata cDNA, mRNA sequence.
ePt_600400	YES	1.23043e-29	140.146	EY764872	CR05-C1-100-089-C11-CT.F Mandarin leaf, greenhouse plant Citrus reticulata cDNA, mRNA sequence.
ePt_599738	YES	1.22667e-29	140.146	FG488575	030114KAWC001852HT (KAWC) Actinidia chinensis - active meristems Actinidia chinensis cDNA clone KAWCC00185, mRNA sequence.
ePt_639589	YES	1.17399e-29	140.146	EL890971	CGF2003235_B04 WLN-02: walnut leaf from plants infected with Pratylenchus vulnus Juglans hindsii x Juglans regia cDNA clone WLN-02-1_II_B04 5', mRNA sequence.
ePt_637476	YES	1.14953e-29	140.146	GW877151	JC006666 Seed specific Normalized cDNA library from Jatropha curcas L. Jatropha curcas cDNA clone N11232 5' similar to Trafficking protein particle complex subunit, mRNA sequence.
ePt_566629	YES	1.11379e-29	140.146	CA993959	pGH737 pGH Gossypium hirsutum cDNA 5', mRNA sequence.
ePt_644300	YES	1.11379e-29	140.146	CA993959	pGH737 pGH Gossypium hirsutum cDNA 5', mRNA sequence.
ePt_575146	YES	1.10814e-29	140.146	ES595889	000001603752_E03.ab1 Eucalyptus globulus under low temperature Eucalyptus globulus cDNA, mRNA sequence.
ePt_503764	YES	9.82089e-30	140.146	HO799175	vsu-ars_024208_LI15contig_11304 VSU-ARS-L15 Phaseolus acutifolius cDNA, mRNA sequence.
ePt_638598	YES	8.59799e-30	140.146	AM823999	AM823999 COL, cold overnight library Nicotiana tabacum cDNA clone nt006162018, mRNA sequence.
ePt_639248	YES	8.39103e-30	140.146	DV155620	CV03098B1B01.f1 CV03-normalized library Euphorbia esula cDNA clone CV03098B1B01.f1 5, mRNA sequence.
ePt_503900	YES	7.95831e-30	140.146	EL966679	S348 SI, cDNA forward subtractive library from peanut leaves inoculated with Cercosporidium personatum Arachis hypogaea subsp. fastigiata cDNA clone AHBGSI2001C05, mRNA sequence.
ePt_564193	YES	7.75136e-30	140.146	CO417366	Mdfr3012d05.y2 Mdfr Malus x domestica cDNA clone Mdfr3012d05 5', mRNA sequence.
ePt_504669	YES	6.77303e-30	140.146	FN713588	FN713588 WZOAQPAB Quercus petraea cDNA clone WZ0AQPAB12YM10FM1, mRNA sequence.
ePt_571601	YES	6.56382e-30	141.949	CB968034	egx28f01_F Differentiating xylem Eucalyptus grandis cDNA clone egx28f01 5', mRNA sequence.
ePt_570580	YES	6.55844e-30	141.949	CB968034	egx28f01_F Differentiating xylem Eucalyptus grandis cDNA clone egx28f01 5', mRNA sequence.
ePt_600703	YES	6.34031e-30	140.146	CB628546	OSIIEb04C23.f OSIIEb Oryza sativa Indica Group cDNA clone OSIIEb04C23 5', mRNA sequence.
[truncated: 4,898 more rows]
